# Supplementary material for: Generation of formaldehyde and formaldehyde-d2 for hydroxymethylations and hydroxydeuteromethylations of difluoroenolates and difluorobenzyl carbanions
Source: Royal Society of Chemistry journal article supplement (doi:10.1039/d2cc01518h), 2022-01-01

Supporting Information for

## Generation of Formaldehyde and Formaldehyde- $d_2$ for Hydroxymethylations and Hydroxydeuteromethylations of Difluoroenolates and Difluorobenzyl Carbanions

Hari R. Khatri,<sup>†</sup> Changho Han,<sup>‡</sup> Reem A. Alkhodier,<sup>†</sup> Amna T. Adam,<sup>†</sup> Baharul Islam,<sup>†</sup> and David A. Colby<sup>\*,†</sup>

<sup>†</sup> *Department of BioMolecular Sciences, University of Mississippi, University, Mississippi 38677*

<sup>‡</sup> *Department of Medicinal Chemistry and Molecular Pharmacology, Purdue University, West Lafayette, Indiana 47907*

### Table of Contents:

|      |                                                                                                                           |     |
|------|---------------------------------------------------------------------------------------------------------------------------|-----|
| I.   | Experimental and Characterization Data.....                                                                               | S1  |
| 1.   | <b>Table S1.</b> Optimization of the Preparation of Difluoroethanol <b>1</b> .....                                        | S2  |
| II.  | Computations.....                                                                                                         | S11 |
| 1.   | <b>Table S2.</b> Free energies (G) and enthalpies (H) of intermediates and products in the proposed mechanism.....        | S11 |
| 2.   | <b>Figure S1.</b> Free energies (G) and enthalpies (H) of the three investigated processes (in kcal/mol at 298.15K) ..... | S12 |
| III. | References.....                                                                                                           | S12 |
| IV.  | Spectral Data.....                                                                                                        | S14 |

### I. Experimental and Characterization Data

**General Procedures.** Experiments requiring anhydrous conditions were performed under argon atmosphere and organic solvents were dried over molecular sieves. All solvents and reagents were purchased from commercial sources unless otherwise noted. Starting materials for compounds **1–6** and **10–14** were prepared according to our laboratory's published methods.<sup>1–4</sup> Thin-layer chromatography was conducted using MilliporeSigma TLC silica gel 60 F<sub>254</sub> plates. Preparative thin-layer chromatography was performed using Sorbent Technologies silica G prep TLC plates with UV254. Flash chromatography was conducted using SiliCycle Siliaflash silica gel P60 (40–63 μm) 60Å. Melting points were taken on an OptiMelt apparatus from Stanford Research Systems and are not corrected. NMR spectra were recorded on a Bruker ARX 300 MHz, a Bruker Topspin Avance III HD 500 MHz spectrometer equipped with prodigy cryoprobe, or a Bruker Avance III HD 400 MHz spectrometer. The residual solvent peaks were used as an internal standard for <sup>1</sup>H and <sup>13</sup>C NMR spectra whereas trifluorotoluene was used as an added internal standard for <sup>19</sup>F NMR spectra. Mass spectrometry was acquired by the Department of Chemistry at the University of Mississippi using SYNAPT HD Mass Spectrometer from Waters. Infrared spectra were recorded on Agilent Technologies Cary 630 FTIR.

**Table S1.** Optimization of the Preparation of Difluoroethanol **1**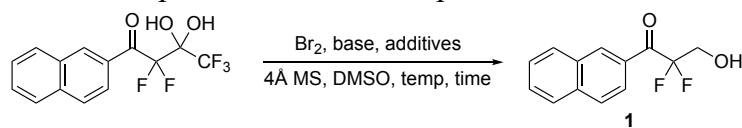

| Entry | Base                            | Additive                            | Temp  | Time | Yield ( <sup>19</sup> F NMR) |
|-------|---------------------------------|-------------------------------------|-------|------|------------------------------|
| 1     | Li <sub>2</sub> CO <sub>3</sub> | -                                   | rt    | 12 h | 0%                           |
| 2     | Na <sub>2</sub> CO <sub>3</sub> | -                                   | 50 °C | 12 h | 30%                          |
| 3     | K <sub>2</sub> CO <sub>3</sub>  | -                                   | rt    | 12 h | 33%                          |
| 4     | Cs <sub>2</sub> CO <sub>3</sub> | LiBr                                | rt    | 12 h | 61%                          |
| 5     | Cs <sub>2</sub> CO <sub>3</sub> | LiBr, proton sponge                 | rt    | 20 h | 73%                          |
| 6     | K <sub>2</sub> CO <sub>3</sub>  | LiBr, proton sponge                 | rt    | 20 h | 61%                          |
| 7     | Na <sub>2</sub> CO <sub>3</sub> | LiBr, proton sponge                 | rt    | 20 h | 52%                          |
| 8     | Cs <sub>2</sub> CO <sub>3</sub> | LiBr, proton sponge                 | rt    | 12 h | 78%                          |
| 9     | Cs <sub>2</sub> CO <sub>3</sub> | LiBr, <i>i</i> -Pr <sub>2</sub> NEt | rt    | 12 h | 64%                          |

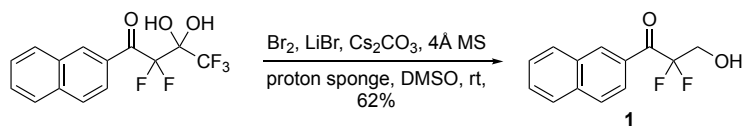

**2,2-Difluoro-3-hydroxy-1-(naphthalen-2-yl)propan-1-one (1).** A mixture of activated 4Å molecular sieves (100 mg), Cs<sub>2</sub>CO<sub>3</sub> (106 mg, 0.325 mmol), LiBr (14 mg, 0.16 mmol), and proton sponge (14 mg, 0.07 mmol) in DMSO (1.0 mL) was cooled to 10 °C and treated with the dropwise addition of bromine (15 μL, 0.29 mmol). After 15 min, a solution of the *gem*-diol<sup>2</sup> (10 mg, 0.031 mmol) in DMSO (0.3 mL) was added to the reaction mixture across 1 h via syringe pump. The reaction mixture was then stirred for 12 h at rt. Next, the reaction mixture was treated with saturated aqueous NH<sub>4</sub>Cl (2 mL), diluted EtOAc (50 mL), and stirred for 1 h. The resultant mixture was filtered through Celite, and the organics were washed with brine (3 × 5 mL), dried over Na<sub>2</sub>SO<sub>4</sub>, and concentrated under reduced pressure. Preparative TLC (3% EtOAc in CHCl<sub>3</sub>) afforded the title compound **1** as a pale yellow solid (4.5 mg, 62%): mp 42–44 °C; <sup>1</sup>H NMR (500 MHz, CDCl<sub>3</sub>) δ 8.75 (s, 1H), 8.10 (d, *J* = 8.5 Hz, 1H), 8.02 (d, *J* = 8.1 Hz, 1H), 7.93 (d, *J* = 8.7 Hz, 1H), 7.90 (d, *J* = 8.1 Hz, 1H), 7.66 (ddd, *J* = 8.3, 7.0, 1.5 Hz, 1H), 7.59 (ddd, *J* = 8.0, 7.0, 1.0 Hz, 1H), 4.22 (td, *J* = 12.9, 7.5 Hz, 2H), 2.39 (br s, 1H); <sup>13</sup>C NMR (125 MHz, CDCl<sub>3</sub>) δ 189.6 (t, *J*<sub>CF</sub> = 30.8 Hz, 1C), 136.2, 133.3 (t, *J*<sub>CF</sub> = 4.5 Hz, 1C), 132.2, 130.2, 129.6, 128.8 (t, *J*<sub>CF</sub> = 3.1 Hz, 1C), 128.7, 127.8, 127.1, 124.5, 116.2 (t, *J*<sub>CF</sub> = 257.0 Hz, 1C), 62.8 (t, *J*<sub>CF</sub> = 28.8 Hz, 1C); <sup>19</sup>F NMR (376 MHz, CDCl<sub>3</sub>) δ -109.1 (t, *J*<sub>HF</sub> = 12.8 Hz, 2F); IR (film) ν<sub>max</sub> 3390, 3062, 2924, 2853, 1692, 1626, 1597, 1467 cm<sup>-1</sup>; HRMS (ESI-TOF) *m/z* calcd for C<sub>13</sub>H<sub>9</sub>F<sub>2</sub>O<sub>2</sub> [M-H]<sup>-</sup> 235.0571, found 235.0563.

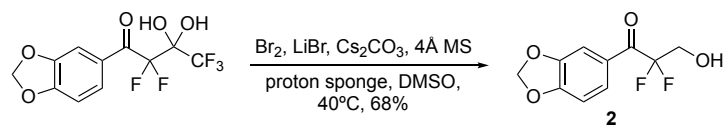

**1-(Benzo[1,3]dioxol-5-yl)-2,2-difluoro-3-hydroxypropan-1-one (2).** A mixture of activated 4Å molecular sieves (150 mg), Cs<sub>2</sub>CO<sub>3</sub> (135 mg, 0.414 mmol), LiBr (17 mg, 0.20 mmol), and proton sponge (17 mg, 0.079 mmol) in DMSO (1.5 mL) was cooled to 10 °C and treated with the dropwise addition of bromine (20 μL, 0.39 mmol). After 15 min, a solution of the *gem*-diol<sup>2</sup> (12 mg, 0.038 mmol) in DMSO (1.0 mL) was added to the reaction mixture across 1 h via syringe pump. The

reaction mixture was then stirred for 20 h at 40 °C. Next, the reaction mixture was cooled to rt, treated with saturated aqueous NH<sub>4</sub>Cl (3 mL), diluted EtOAc (50 mL), and stirred for 1 h. The resultant mixture was filtered through Celite, and the organics were washed with brine (3 × 5 mL), dried over Na<sub>2</sub>SO<sub>4</sub>, and concentrated under reduced pressure. Preparative TLC (10% EtOAc in CHCl<sub>3</sub>) afforded the title compound **2** as a yellow oil (6 mg, 68%): <sup>1</sup>H NMR (500 MHz, CDCl<sub>3</sub>) δ 7.81 (dd, *J* = 8.4, 1.5 Hz, 1H), 7.54 (s, 1H), 6.90 (d, *J* = 8.3 Hz, 1H), 6.08 (s, 2H), 4.12 (t, *J* = 12.9 Hz, 2H), 2.49 (s, 1H); <sup>13</sup>C NMR (125 MHz, CDCl<sub>3</sub>) δ 187.6 (t, *J*<sub>CF</sub> = 27.7 Hz, 1C), 152.8, 148.0, 127.0 (t, *J*<sub>CF</sub> = 4.1 Hz, 1C), 126.5 (t, *J*<sub>CF</sub> = 1.4 Hz, 1C), 117.8 (t, *J*<sub>CF</sub> = 253.9 Hz, 1C), 108.6 (t, *J*<sub>CF</sub> = 2.7 Hz, 1C), 108.4, 102.5, 61.8 (t, *J*<sub>CF</sub> = 27.9 Hz, 1C); <sup>19</sup>F NMR (471 MHz, CDCl<sub>3</sub>) δ -108.0 (t, *J*<sub>HF</sub> = 13.0 Hz, 2F); IR (film) ν<sub>max</sub> 3463, 2916, 1685, 1606, 1491, 1448, 1359, 1255 cm<sup>-1</sup>; HRMS (ESI-TOF) *m/z* calcd for C<sub>10</sub>H<sub>7</sub>F<sub>2</sub>O<sub>4</sub> [M-H]<sup>-</sup> 229.0312, found 229.0292.

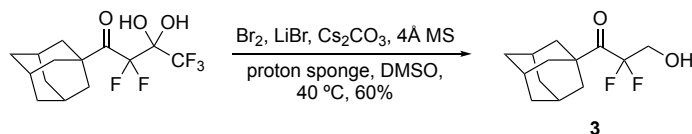

**1-(Adamantan-1-yl)-2,2-difluoro-3-hydroxypropan-1-one (3).** A mixture of activated 4Å molecular sieves (200 mg), Cs<sub>2</sub>CO<sub>3</sub> (210 mg, 0.645 mmol), LiBr (25 mg, 0.29 mmol), and proton sponge (25 mg, 0.12 mmol) in DMSO (2 mL) was cooled to 10 °C and treated with the dropwise addition of bromine (30 μL, 0.58 mmol). After 15 min, a solution of the *gem*-diol<sup>2</sup> (20 mg, 0.06 mmol) in DMSO (0.3 mL) was added to the reaction mixture across 30 min via syringe pump. The reaction mixture was then stirred for 12 h at 40 °C. Next, the reaction mixture was cooled to rt, treated with saturated aqueous NH<sub>4</sub>Cl (4 mL), diluted EtOAc (50 mL), and stirred for 1 h. The resultant mixture was filtered through Celite, and the organics were washed with brine (3 × 5 mL), dried over Na<sub>2</sub>SO<sub>4</sub>, and concentrated under reduced pressure. Preparative TLC (1% Et<sub>2</sub>O in CH<sub>2</sub>Cl<sub>2</sub>) afforded the title compound **3** as a yellow oil (9 mg, 60%): <sup>1</sup>H NMR (500 MHz, CDCl<sub>3</sub>) δ 3.94 (t, *J* = 12.9 Hz, 2H), 2.08 (br s, 3H), 1.99 (br s, 6H), 1.75 (dd, *J* = 20.5, 12.5 Hz, 6H), 1.61 (br s, 1H); <sup>13</sup>C NMR (125 MHz, CDCl<sub>3</sub>) δ 204.7 (t, *J*<sub>CF</sub> = 27.7 Hz, 1C), 116.9 (t, *J*<sub>CF</sub> = 258.7 Hz, 1C), 62.8 (t, *J*<sub>CF</sub> = 29.2 Hz, 1C), 46.3 (t, *J*<sub>CF</sub> = 2.6 Hz, 1C), 37.2 (3C), 36.3 (3C), 27.8 (3C); <sup>19</sup>F NMR (471 MHz, CDCl<sub>3</sub>) δ -111.3 (t, *J*<sub>HF</sub> = 13.0 Hz, 2F); IR (film) ν<sub>max</sub> 3408, 2906, 2853, 1715, 1454 cm<sup>-1</sup>; HRMS (ESI-TOF) *m/z* calcd for C<sub>13</sub>H<sub>17</sub>F<sub>2</sub>O<sub>2</sub> [M-H]<sup>-</sup> 243.1197, found 243.1193.

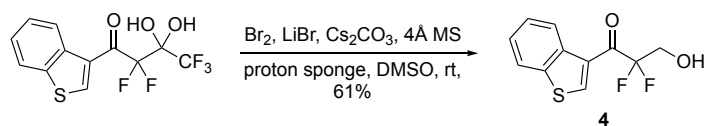

**1-(Benzothiophen-3-yl)-2,2-difluoro-3-hydroxypropan-1-one (4).** A mixture of activated 4Å molecular sieves (200 mg), Cs<sub>2</sub>CO<sub>3</sub> (220 mg, 0.675 mmol), LiBr (27 mg, 0.31 mmol), and proton sponge (27 mg, 0.13 mmol) in DMSO (2 mL) was cooled to 10 °C and treated with the dropwise addition of bromine (32 μL, 0.62 mmol). After 15 min, a solution of the *gem*-diol<sup>3</sup> (20 mg, 0.061 mmol) in DMSO (1.0 mL) was added to the reaction mixture across 30 min via syringe pump. The reaction mixture was then stirred for 20 h at rt. Next, the reaction mixture was treated with saturated aqueous NH<sub>4</sub>Cl (4 mL), diluted EtOAc (50 mL), and stirred for 1 h. The resultant mixture was filtered through Celite, and the organics were washed with brine (3 × 5 mL), dried over Na<sub>2</sub>SO<sub>4</sub>, and concentrated under reduced pressure. Preparative TLC (20% acetone in hexanes) afforded the title compound **4** as a brown oil (9 mg, 61%): <sup>1</sup>H NMR (500 MHz, DMSO-*d*<sub>6</sub>) δ 9.08 (s, 1H), 8.59 (d, *J* = 8.1 Hz, 1H), 8.16 (d, *J* = 8.0 Hz, 1H), 7.58 (t, *J* = 7.7 Hz, 1H), 7.52 (t, *J* = 7.0,

7.1, 1.3 Hz, 1H), 5.85 (t,  $J = 6.3$  Hz, 2H), 4.05 (td,  $J = 14.2, 6.3$  Hz 1H);  $^{13}\text{C}$  NMR (125 MHz, DMSO- $d_6$ )  $\delta$  184.3 (t,  $J_{\text{CF}} = 27.9$  Hz, 1C), 144.4 (t,  $J_{\text{CF}} = 8.2$  Hz, 1C), 138.8, 136.6, 128.3, 126.4, 125.9, 124.3, 123.1, 117.6 (t,  $J_{\text{CF}} = 257.0$  Hz, 1C), 61.9 (t,  $J_{\text{CF}} = 28.2$  Hz, 1C);  $^{19}\text{F}$  NMR (471 MHz,  $\text{CDCl}_3$ )  $\delta$  -107.9 (t,  $J_{\text{HF}} = 12.9$  Hz, 2F); IR (film)  $\nu_{\text{max}}$  3423, 3119, 2929, 1677, 1490, 1460, 1174  $\text{cm}^{-1}$ ; HRMS (ESI-TOF)  $m/z$  calcd for  $\text{C}_{11}\text{H}_7\text{F}_2\text{O}_2\text{S}$   $[\text{M}-\text{H}]^-$  241.0135, found 241.0110.

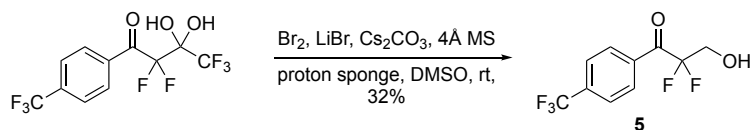

**2,2-Difluoro-3-hydroxy-1-(4-(trifluoromethyl)phenyl)propan-1-one (5).** A mixture of activated 4Å molecular sieves (300 mg),  $\text{Cs}_2\text{CO}_3$  (290 mg, 0.89 mmol), LiBr (38 mg, 0.44 mmol), and proton sponge (38 mg, 0.18 mmol) in DMSO (3 mL) was cooled to 10 °C and treated with the dropwise addition of bromine (38  $\mu\text{L}$ , 0.74 mmol). After 15 min, a solution of the *gem*-diol<sup>4</sup> (25 mg, 0.074 mmol) in DMSO (1.0 mL) was added to the reaction mixture across 1 h via syringe pump. The reaction mixture was then stirred for 12 h at rt. Next, the reaction mixture was treated with saturated aqueous  $\text{NH}_4\text{Cl}$  (6 mL), diluted EtOAc (50 mL), and stirred for 1 h. The resultant mixture was filtered through Celite, and the organics were washed with brine ( $3 \times 5$  mL), dried over  $\text{Na}_2\text{SO}_4$ , and concentrated under reduced pressure. Preparative TLC (6% EtOAc in  $\text{CHCl}_3$ ) afforded the title compound **5** as a yellow oil (6 mg, 32%):  $^1\text{H}$  NMR (500 MHz, DMSO- $d_6$ )  $\delta$  8.20 (d,  $J = 8.1$  Hz, 2H), 7.99 (d,  $J = 8.7$  Hz, 2H), 5.94 (s, 1H), 4.04 (t,  $J = 13.9, 3.1$  Hz, 2H);  $^{13}\text{C}$  NMR (125 MHz, DMSO- $d_6$ )  $\delta$  189.9 (t,  $J_{\text{CF}} = 28.8$  Hz, 1C), 135.7, 133.5 (q,  $J_{\text{CF}} = 32.2$  Hz, 1C), 130.4 (t,  $J_{\text{CF}} = 3.2$  Hz, 2C), 126.0 (q,  $J_{\text{CF}} = 3.9$  Hz, 2C), 123.6 (q,  $J_{\text{CF}} = 272.9$  Hz, 1C), 117.6 (t,  $J_{\text{CF}} = 254.3$  Hz, 1C), 61.6 (t,  $J_{\text{CF}} = 28.2$  Hz, 1C);  $^{19}\text{F}$  NMR (471 MHz,  $\text{CDCl}_3$ )  $\delta$  -63.5 (s, 3F), -109.3 (t,  $J_{\text{HF}} = 12.8$  Hz, 2F); IR (film)  $\nu_{\text{max}}$  3362, 2867, 1709, 1413, 1329, 1174  $\text{cm}^{-1}$ ; HRMS (ESI-TOF)  $m/z$  calcd for  $\text{C}_{10}\text{H}_6\text{F}_5\text{O}_2$   $[\text{M}-\text{H}]^-$  253.0288, found 253.0287.

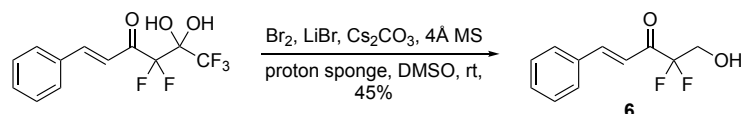

**(E)-4,4-Difluoro-5-hydroxy-1-phenylpent-1-en-3-one (6).** A mixture of activated 4Å molecular sieves (150 mg),  $\text{Cs}_2\text{CO}_3$  (153 mg, 0.47 mmol), LiBr (20 mg, 0.23 mmol), and proton sponge (20 mg, 0.09 mmol) in DMSO (1.5 mL) was cooled to 10 °C and treated with the dropwise addition of bromine (15  $\mu\text{L}$ , 0.29 mmol). After 15 min, a solution of the *gem*-diol<sup>3</sup> (14 mg, 0.047 mmol) in DMSO (0.5 mL) was added to the reaction mixture across 1 h via syringe pump. The reaction mixture was then stirred for 12 h at rt. Next, the reaction mixture was treated with saturated aqueous  $\text{NH}_4\text{Cl}$  (3 mL), diluted EtOAc (25 mL), and stirred for 1 h. The resultant mixture was filtered through Celite, and the organics were washed with brine ( $3 \times 5$  mL), dried over  $\text{Na}_2\text{SO}_4$ , and concentrated under reduced pressure. Preparative TLC (6% EtOAc in  $\text{CHCl}_3$ ) afforded the title compound **6** as a yellow oil (4.5 mg, 45%):  $^1\text{H}$  NMR (500 MHz,  $\text{CDCl}_3$ )  $\delta$  7.92 (d,  $J = 15.9$  Hz, 1H), 7.64 (dd,  $J = 7.6, 1.7$  Hz, 2H), 7.46 (m, 3H), 7.17 (dt,  $J = 16.0, 1.3$  Hz, 1H), 4.08 (td,  $J = 12.9, 7.3$  Hz, 2H), 2.17 (t,  $J = 7.2$  Hz, 1H);  $^{13}\text{C}$  NMR (125 MHz,  $\text{CDCl}_3$ )  $\delta$  189.3 (t,  $J_{\text{CF}} = 30.0$  Hz, 1C), 148.5 (t,  $J_{\text{CF}} = 1.4$  Hz, 1C), 134.0, 132.0, 129.3 (2C), 129.2 (2C) 118.1, 115.3 (t,  $J_{\text{CF}} = 254.9$  Hz, 1C), 62.4 (t,  $J_{\text{CF}} = 29.1$  Hz, 1C);  $^{19}\text{F}$  NMR (471 MHz,  $\text{CDCl}_3$ )  $\delta$  -116.8 (t,  $J_{\text{HF}} = 12.6$  Hz, 2F); IR (film)  $\nu_{\text{max}}$  3388, 2958, 2926, 1701, 1610, 1451, 1329, 1181  $\text{cm}^{-1}$ ; HRMS (ESI-TOF)  $m/z$  calcd for  $\text{C}_{11}\text{H}_9\text{F}_2\text{O}_2$   $[\text{M}-\text{H}]^-$  211.0571, found 211.0580.

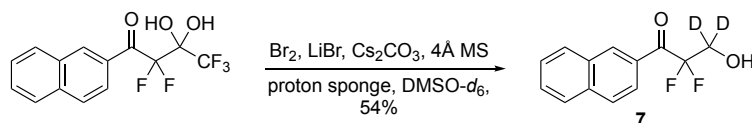

**3,3-Dideutero-2,2-difluoro-3-hydroxy-1-(naphthalen-2-yl)propan-1-one (7).** A mixture of activated 4Å molecular sieves (200 mg), LiBr (27 mg, 0.31 mmol), proton sponge (27 mg, 0.13 mmol), Cs<sub>2</sub>CO<sub>3</sub> (242 mg, 0.743 mmol) in DMSO-*d*<sub>6</sub> (1.6 mL) was cooled to 10 °C and treated with the dropwise addition of bromine (32 μL, 0.62 mmol). After 15 min, a solution of the *gem*-diol<sup>2</sup> (20 mg, 0.062 mmol) in DMSO-*d*<sub>6</sub> (0.5 mL) was added to the reaction mixture across 1 h via syringe pump. The reaction mixture was then stirred for 12 h at rt. Next, the reaction mixture was cooled to rt, treated with saturated aqueous NH<sub>4</sub>Cl (5 mL), diluted EtOAc (50 mL), and stirred for 1 h. The resultant mixture was filtered through Celite, and the organics were washed with brine (3 × 5 mL), dried over Na<sub>2</sub>SO<sub>4</sub>, and concentrated under reduced pressure. Preparative TLC (5% EtOAc in CHCl<sub>3</sub>) afforded the title compound **7** as a colorless solid (8 mg, 54%): mp 43–44 °C; <sup>1</sup>H NMR (400 MHz, CDCl<sub>3</sub>) δ 8.75 (s, 1H), 8.10 (d, *J* = 8.5 Hz, 1H), 8.01 (d, *J* = 8.1 Hz, 1H), 7.93 (d, *J* = 8.7 Hz, 1H), 7.89 (d, *J* = 8.1 Hz, 1H), 7.66 (td, *J* = 7.8, 1.1 Hz, 1H), 7.59 (td, *J* = 7.5, 1.2 Hz, 1H), 2.40 (s, 1H); <sup>13</sup>C NMR (125 MHz, CDCl<sub>3</sub>) δ 189.6 (t, *J*<sub>CF</sub> = 30.5 Hz, 1C), 136.2, 133.3 (t, *J*<sub>CF</sub> = 4.5 Hz, 1C), 132.2, 130.2, 129.6, 128.9 (t, *J*<sub>CF</sub> = 3.0 Hz, 1C), 128.7, 127.8, 127.2, 124.5, 116.2 (t, *J*<sub>CF</sub> = 257.0 Hz, 1C), 62.8 (m, 1C); <sup>19</sup>F NMR (471 MHz, CDCl<sub>3</sub>) δ -108.4 (s, 2F); IR (film) ν<sub>max</sub> 3439, 3062, 2958, 2928, 2864, 1689, 1627, 1467, 1296, 1371 cm<sup>-1</sup>; HRMS (ESI-TOF) *m/z* calcd for C<sub>13</sub>H<sub>7</sub>D<sub>2</sub>F<sub>2</sub>O<sub>2</sub> [M-H]<sup>-</sup> 237.0696, found 237.0710.

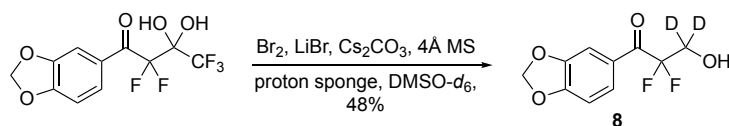

**3,3-Dideutero-1-(benzo[1,3]dioxol-5-yl)-2,2-difluoro-3-hydroxypropan-1-one (8).** A mixture of activated 4Å molecular sieves (150 mg), LiBr (19 mg, 0.22 mmol), proton sponge (19 mg, 0.18 mmol), Cs<sub>2</sub>CO<sub>3</sub> (160 mg, 0.492 mmol) in DMSO-*d*<sub>6</sub> (1.7 mL) was cooled to 10 °C and treated with the dropwise addition of bromine (32 μL, 0.62 mmol). After 15 min, a solution of the *gem*-diol<sup>2</sup> (14 mg, 0.044 mmol) in DMSO-*d*<sub>6</sub> (1.0 mL) was added to the reaction mixture across 1 h via syringe pump. The reaction mixture was then stirred for 24 h at 40 °C. Next, the reaction mixture was cooled to rt, treated with saturated aqueous NH<sub>4</sub>Cl (5 mL), diluted EtOAc (50 mL), and stirred for 1 h. The resultant mixture was filtered through Celite, and the organics were washed with brine (3 × 5 mL), dried over Na<sub>2</sub>SO<sub>4</sub>, and concentrated under reduced pressure. Preparative TLC (30% acetone in hexanes) afforded the title compound **8** as a yellow oil (5 mg, 48%): <sup>1</sup>H NMR (500 MHz, CDCl<sub>3</sub>) δ 7.82 (d, *J* = 10.1 Hz, 1H), 7.55 (s, 1H), 6.90 (d, *J* = 8.4 Hz, 1H), 6.08 (s, 2H), 2.44 (s, 1H); <sup>13</sup>C NMR (125 MHz, CDCl<sub>3</sub>) δ 187.7 (t, *J*<sub>CF</sub> = 30.4 Hz, 1C), 153.4, 148.2, 127.7 (t, *J*<sub>CF</sub> = 4.3 Hz, 1C), 126.1 (t, *J*<sub>CF</sub> = 3.2 Hz, 1C), 116.0 (t, *J*<sub>CF</sub> = 257.0 Hz, 1C), 109.5 (t, *J*<sub>CF</sub> = 2.7 Hz, 1C), 108.3, 102.2, 62.7 (m, 1C); <sup>19</sup>F NMR (471 MHz, CDCl<sub>3</sub>) δ -108.2 (s, 2F); IR (film) ν<sub>max</sub> 3420, 2916, 1681, 1605, 1446, 1247 cm<sup>-1</sup>; HRMS (ESI-TOF) *m/z* calcd for C<sub>10</sub>H<sub>6</sub>D<sub>2</sub>F<sub>2</sub>O<sub>4</sub> (M+H)<sup>+</sup> 233.0594, found 233.0595.

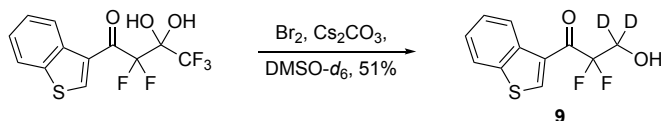

**3,3-Dideutero-1-(benzothiophen-3-yl)-2,2-difluoro-3-hydroxypropan-1-one (9).** A mixture of activated 4Å molecular sieves (250 mg), LiBr (35 mg, 0.40 mmol), proton sponge (35 mg, 0.16 mmol), Cs<sub>2</sub>CO<sub>3</sub> (285 mg, 0.875 mmol) in DMSO-*d*<sub>6</sub> (3 mL) was cooled to 10 °C and treated with the dropwise addition of bromine (40 μL, 0.78 mmol). After 15 min, a solution of the *gem*-diol<sup>3</sup> (26 mg, 0.080 mmol) in DMSO-*d*<sub>6</sub> (1.0 mL) was added to the reaction mixture across 1 h via syringe pump. The reaction mixture was then stirred for 24 h at 40 °C. Next, the reaction mixture was cooled to rt, treated with saturated aqueous NH<sub>4</sub>Cl (5 mL), diluted EtOAc (50 mL), and stirred for 1 h. The resultant mixture was filtered through Celite, and the organics were washed with brine (3 × 5 mL), dried over Na<sub>2</sub>SO<sub>4</sub>, and concentrated under reduced pressure. Preparative TLC (5% EtOAc in hexanes) afforded the title compound **9** as a brown oil (10 mg, 51%): <sup>1</sup>H NMR (500 MHz, CDCl<sub>3</sub>) δ 8.80 (t, *J* = 1.8 Hz, 1H), 8.72 (d, *J* = 8.9 Hz, 1H), 7.90 (d, *J* = 8.0 Hz, 1H), 7.54 (t, *J* = 7.7 Hz, 1H), 7.47 (t, *J* = 7.6 Hz, 1H), 2.33 (s, 1H); <sup>13</sup>C NMR (125 MHz, CDCl<sub>3</sub>) δ 184.3 (t, *J*<sub>CF</sub> = 30.1 Hz, 1C), 142.7 (t, *J*<sub>CF</sub> = 8.4 Hz, 1C), 139.0, 136.9, 128.5 (t, *J*<sub>CF</sub> = 3.0 Hz, 1C), 126.4, 126.0, 125.1, 122.3, 116.0 (t, *J*<sub>CF</sub> = 257.0 Hz, 1C), 62.1 (m, 1C); <sup>19</sup>F NMR (471 MHz, CDCl<sub>3</sub>) δ -108.0 (s, 2F); IR (film) ν<sub>max</sub> 3405, 3119, 3063, 1673, 1490, 1219, 1100 cm<sup>-1</sup>; HRMS (ESI-TOF) *m/z* calcd for C<sub>11</sub>H<sub>5</sub>D<sub>2</sub>F<sub>2</sub>O<sub>2</sub>S (M-H)<sup>-</sup>, 243.0260, found 243.0254.

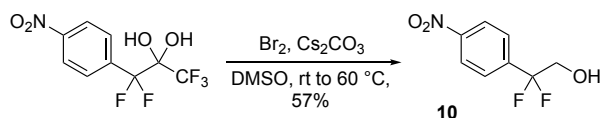

**2,2-Difluoro-2-(4-nitrophenyl)ethan-1-ol (10).** A mixture of activated 4Å molecular sieves (130 mg) and Cs<sub>2</sub>CO<sub>3</sub> (115 mg, 0.350 mmol) in DMSO (1.2 mL) was cooled to 10 °C and treated with the dropwise addition of bromine (17 μL, 0.33 mmol). After 15 min, a solution of the *gem*-diol<sup>1</sup> (10 mg, 0.035 mmol) in DMSO (0.3 mL) was added to the reaction mixture across 1 h via syringe pump. The reaction mixture was then stirred for 18 h at 60 °C. Next, the reaction mixture was cooled to rt, treated with saturated aqueous NH<sub>4</sub>Cl (2 mL), diluted EtOAc (50 mL), and stirred for 1 h. The resultant mixture was filtered through Celite, and the organics were washed with brine (3 × 5 mL), dried over Na<sub>2</sub>SO<sub>4</sub>, and concentrated under reduced pressure. Preparative TLC (3% EtOAc in CHCl<sub>3</sub>) afforded the title compound **10** as a colorless solid (4 mg, 57%): mp 86–89 °C; <sup>1</sup>H NMR (500 MHz, CDCl<sub>3</sub>) δ 8.31 (d, *J* = 8.4 Hz, 2H), 7.74 (d, *J* = 8.6 Hz, 2H), 4.02 (t, *J* = 12.7 Hz, 2H), 1.84 (br s, 1H); <sup>13</sup>C NMR (125 MHz, CDCl<sub>3</sub>) δ 149.4, 140.7 (t, *J*<sub>CF</sub> = 26.1 Hz, 1C), 127.0 (t, *J*<sub>CF</sub> = 6.1 Hz, 2C), 123.7 (2C), 119.6 (t, *J*<sub>CF</sub> = 253.1 Hz, 1C), 65.6 (t, *J*<sub>CF</sub> = 32.9 Hz, 1C); <sup>19</sup>F NMR (376 MHz, CDCl<sub>3</sub>) δ -107.1 (t, *J*<sub>HF</sub> = 12.8 Hz, 2F); IR (film) ν<sub>max</sub> 3519, 1519, 1352, 1314 cm<sup>-1</sup>; HRMS (EI-BE) *m/z* calcd for C<sub>8</sub>H<sub>7</sub>F<sub>2</sub>NO<sub>3</sub> [M]<sup>+</sup> 203.0394, found, 203.0392.

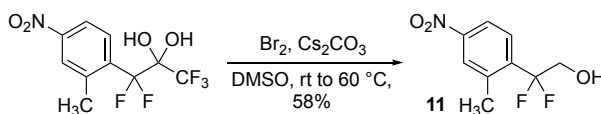

**2,2-Difluoro-2-(2-methyl-4-nitrophenyl)ethan-1-ol (11).** A mixture of activated 4Å molecular sieves (170 mg) and Cs<sub>2</sub>CO<sub>3</sub> (130 mg, 0.40 mmol) in DMSO (1.5 mL) was cooled to 10 °C and treated with the dropwise addition of bromine (20 μL, 0.39 mmol). After 15 min, a solution of the *gem*-diol<sup>1</sup> (12 mg, 0.04 mmol) in DMSO (0.5 mL) was added to the reaction mixture across 1 h via syringe pump. The reaction mixture was then stirred for 24 h at 65 °C. Next, the reaction mixture was cooled to rt, treated with saturated aqueous NH<sub>4</sub>Cl (3 mL), diluted EtOAc (50 mL), and stirred for 1 h. The resultant mixture was filtered through Celite, and the organics were washed with brine (3 × 5 mL), dried over Na<sub>2</sub>SO<sub>4</sub>, and concentrated under reduced pressure. Preparative

TLC (3% EtOAc in CHCl<sub>3</sub>) afforded the title compound **11** as a colorless solid (5 mg, 58%): mp 106–107 °C; <sup>1</sup>H NMR (500 MHz, CDCl<sub>3</sub>) δ 8.09 (s, 1H), 8.08 (d, *J* = 8.5 Hz, 1H), 7.69 (d, *J* = 8.2 Hz, 1H), 4.06 (t, *J* = 13.3 Hz, 2H), 2.59 (s, 3H), 1.96 (br s, 1H); <sup>13</sup>C NMR (125 MHz, CDCl<sub>3</sub>) δ 148.7, 138.8 (t, *J*<sub>CF</sub> = 2.3 Hz, 1C) 138.5 (t, *J*<sub>CF</sub> = 24.4 Hz, 1C), 128.4 (t, *J*<sub>CF</sub> = 8.7 Hz, 1C), 126.6, 120.8 (t, *J*<sub>CF</sub> = 246.1 Hz, 1C), 120.8, 64.9 (t, *J*<sub>CF</sub> = 31.7 Hz, 1C), 20.5 (t, *J*<sub>CF</sub> = 4.0 Hz, 1C); <sup>19</sup>F NMR (471 MHz, CDCl<sub>3</sub>) δ –105.0 (t, *J*<sub>HF</sub> = 13.4 Hz, 2F); IR (film) ν<sub>max</sub> 3521, 3096, 2946, 1520, 1351 cm<sup>-1</sup>; HRMS (ESI–TOF) *m/z* calcd for C<sub>9</sub>H<sub>8</sub>F<sub>2</sub>NO<sub>3</sub> [M–H]<sup>-</sup> 216.0472, found 216.0473.

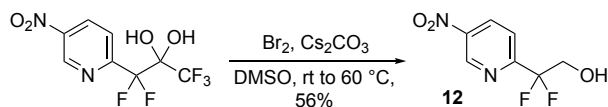

**2,2-Difluoro-2-(5-nitropyridin-2-yl)ethan-1-ol (12).** A mixture of activated 4Å molecular sieves (100 mg) and Cs<sub>2</sub>CO<sub>3</sub> (110 mg, 0.338 mmol) in DMSO (1.2 mL) was cooled to 10 °C and treated with the dropwise addition of bromine (15 μL, 0.29 mmol). After 15 min, a solution of the *gem*-diol<sup>1</sup> (10 mg, 0.033 mmol) in DMSO (0.5 mL) was added to the reaction mixture across 1 h via syringe pump. The reaction mixture was then stirred for 24 h at 60 °C. Next, the reaction mixture was cooled to rt, treated with saturated aqueous NH<sub>4</sub>Cl (2 mL), diluted EtOAc (50 mL), and stirred for 1 h. The resultant mixture was filtered through Celite, and the organics were washed with brine (3 × 5 mL), dried over Na<sub>2</sub>SO<sub>4</sub>, and concentrated under reduced pressure. Preparative TLC (10% EtOAc in CHCl<sub>3</sub>) afforded the title compound **12** as a colorless oil (4 mg, 56%): <sup>1</sup>H NMR (500 MHz, CDCl<sub>3</sub>) δ 9.45 (s, 1H), 8.65 (dd, *J* = 8.6, 2.6 Hz, 1H), 7.95 (d, *J* = 8.6 Hz, 1H), 4.28 (t, *J* = 12.5 Hz, 2H), 2.70 (br s, 1H); <sup>13</sup>C NMR (125 MHz, CDCl<sub>3</sub>) δ 158.5 (t, *J*<sub>CF</sub> = 30.1 Hz, 1C), 144.8, 144.6, 132.7, 121.8 (t, *J*<sub>CF</sub> = 3.6 Hz, 1C), 117.7 (t, *J*<sub>CF</sub> = 244.6 Hz, 1C), 63.7 (t, *J*<sub>CF</sub> = 30.7 Hz, 1C). <sup>19</sup>F NMR (471 MHz, CDCl<sub>3</sub>) δ –107.1 (t, *J*<sub>HF</sub> = 12.5 Hz, 2F); IR (film) ν<sub>max</sub> 3585, 3109, 2936, 1607, 1530, 1358, 1320 cm<sup>-1</sup>; HRMS (ESI–TOF) *m/z* calcd for C<sub>7</sub>H<sub>7</sub>F<sub>2</sub>N<sub>2</sub>O<sub>3</sub> [M+H]<sup>+</sup> 205.0425, found 205.0424.

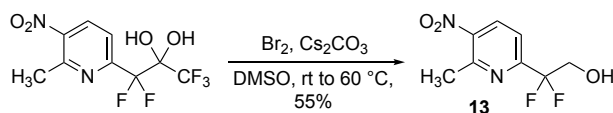

**2,2-Difluoro-2-(6-methyl-5-nitropyridin-2-yl)ethan-1-ol (13).** A mixture of activated 4Å molecular sieves (100 mg) and Cs<sub>2</sub>CO<sub>3</sub> (110 mg, 0.338 mmol) in DMSO (1.0 mL) was cooled to 10 °C and treated with the dropwise addition of bromine (15 μL, 0.29 mmol). After 15 min, a solution of the *gem*-diol<sup>1</sup> (10 mg, 0.033 mmol) in DMSO (0.4 mL) was added to the reaction mixture across 1 h via syringe pump. The reaction mixture was then stirred for 24 h at 60 °C. Next, the reaction mixture was cooled to rt, treated with saturated aqueous NH<sub>4</sub>Cl (2 mL), diluted EtOAc (50 mL), and stirred for 1 h. The resultant mixture was filtered through Celite, and the organics were washed with brine (3 × 5 mL), dried over Na<sub>2</sub>SO<sub>4</sub>, and concentrated under reduced pressure. Preparative TLC (10% EtOAc in CHCl<sub>3</sub>) afforded the title compound **13** as a colorless solid (4 mg, 55%): mp 73–75 °C; <sup>1</sup>H NMR (400 MHz, CDCl<sub>3</sub>) δ 8.42 (d, *J* = 8.4 Hz, 1H), 7.78 (d, *J* = 8.6 Hz, 1H), 4.27 (td, *J* = 12.3, 6.2 Hz, 3H), 2.90 (s, 3H), 2.74 (t, *J* = 6.8 Hz, 1H); <sup>13</sup>C NMR (100 MHz, CDCl<sub>3</sub>) δ 156.3 (t, *J*<sub>CF</sub> = 30.1 Hz, 1C), 153.6, 146.3, 134.0, 119.6 (t, *J*<sub>CF</sub> = 3.6 Hz, 1C) 117.5 (t, *J*<sub>CF</sub> = 244.9 Hz, 1C), 63.8 (t, *J*<sub>CF</sub> = 30.6 Hz, 1C), 23.8; <sup>19</sup>F NMR (376 MHz, CDCl<sub>3</sub>) δ –108.2 (t, *J*<sub>HF</sub> = 12.6 Hz, 2F); IR (film) ν<sub>max</sub> 3400, 3094, 2934, 1602, 1582, 1530, 1350, 1332 cm<sup>-1</sup>; HRMS (ESI–TOF) *m/z* calcd for C<sub>8</sub>H<sub>7</sub>F<sub>2</sub>N<sub>2</sub>O<sub>3</sub> [M–H]<sup>-</sup> 217.0425, found 217.0415.

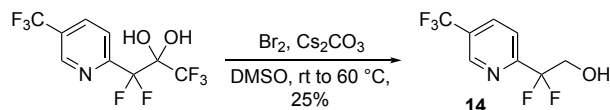

**2,2-Difluoro-2-(5-(trifluoromethyl)pyridin-2-yl)ethan-1-ol (14).** A mixture of activated 4Å molecular sieves (200 mg) and  $\text{Cs}_2\text{CO}_3$  (208 mg, 0.638 mmol) in DMSO (2.0 mL) was cooled to 10 °C and treated with the dropwise addition of bromine (30  $\mu\text{L}$ , 0.59 mmol). After 15 min, a solution of the *gem*-diol<sup>1</sup> (18 mg, 0.058 mmol) in DMSO (0.5 mL) was added to the reaction mixture across 1 h via syringe pump. The reaction mixture was then stirred for 24 h at 60 °C. Next, the reaction mixture was cooled to rt, treated with saturated aqueous  $\text{NH}_4\text{Cl}$  (4 mL), diluted EtOAc (50 mL), and stirred for 1 h. The resultant mixture was filtered through Celite, and the organics were washed with brine (3  $\times$  10 mL), dried over  $\text{Na}_2\text{SO}_4$ , and concentrated under reduced pressure. Preparative TLC (25% acetone in hexanes) afforded the title compound **14** as a colorless oil (4 mg, 25%):  $^1\text{H}$  NMR (500 MHz,  $\text{CDCl}_3$ )  $\delta$  8.91 (s, 1H), 8.13 (dd,  $J = 8.2$  Hz, 1H), 7.88 (d,  $J = 8.2$  Hz, 1H), 4.27 (t,  $J = 12.5$  Hz, 2H), 2.83 (s, 1H);  $^{13}\text{C}$  NMR (125 MHz,  $\text{CDCl}_3$ )  $\delta$  157.1 (t,  $J_{\text{CF}} = 29.6$  Hz, 1C), 146.2 (q,  $J_{\text{CF}} = 3.9$  Hz, 1C), 135.1 (q,  $J_{\text{CF}} = 3.7$  Hz, 1C), 128.2 (q,  $J_{\text{CF}} = 33.7$  Hz, 1C), 122.9 (q,  $J_{\text{CF}} = 272.5$  Hz, 1C), 121.3 (t,  $J_{\text{CF}} = 3.3$  Hz, 1C), 117.9 (t,  $J_{\text{CF}} = 244.0$  Hz, 1C), 64.1 (t,  $J_{\text{CF}} = 30.8$  Hz, 1C);  $^{19}\text{F}$  NMR (471 MHz,  $\text{CDCl}_3$ )  $\delta$  -62.7 (s, 3F), -106.9 (t,  $J_{\text{HF}} = 12.6$  Hz, 2F); IR (film)  $\nu_{\text{max}}$  3339, 2930, 2854, 1735, 1689, 1556, 1350, 1463, 1325  $\text{cm}^{-1}$ ; HRMS (ESI-TOF)  $m/z$  calcd for  $\text{C}_8\text{H}_7\text{F}_5\text{NO}$   $[\text{M}+\text{H}]^+$  228.0448, found 228.0457.

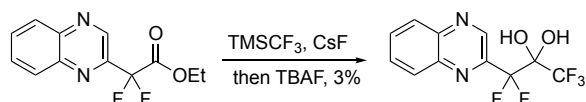

**1,1,1,3,3-Pentafluoro-3-(quinoxalin-2-yl)propane-2,2-diol.** A solution of ethyl 2,2-difluoro-2-(2-quinoxalinyloxy)acetate<sup>5</sup> (603 mg, 2.39 mmol) in  $\text{CH}_3\text{CN}$  (6 mL) was treated with trimethyl(trifluoromethyl)silane (0.71 mL, 4.8 mmol). The mixture was stirred for 20 min at rt and then cooled to -30 °C. Next, a mixture of cesium fluoride (182 mg, 1.20 mmol) in  $\text{CH}_3\text{CN}$  (12 mL) was added, and the resultant mixture was stirred for 18 h at rt. The reaction mixture was quenched with saturated aqueous  $\text{NH}_4\text{Cl}$  (20 mL) at -20 °C and stirred for 1 h. The mixture was filtered through Celite and extracted with  $\text{CH}_2\text{Cl}_2$  (20 mL  $\times$  3). The organic layer was dried over  $\text{Na}_2\text{SO}_4$ , filtered, and concentrated under reduced pressure. The crude reaction mixture was treated with TBAF (3 mL, 1.0 M in THF) in  $\text{CH}_2\text{Cl}_2$  (6 mL) and stirred at rt for 20 h. Then, the mixture was quenched with saturated aqueous  $\text{NH}_4\text{Cl}$  (10 mL) and filtered through Celite. Next, the mixture was extracted with  $\text{CH}_2\text{Cl}_2$  (10 mL  $\times$  3), filtered, and concentrated under reduced pressure. Preparative TLC (10% isopropanol/40% dichloromethane/50% hexanes, then 7% isopropanol/13% dichloromethane/80% hexanes) afforded 1,1,1,3,3-pentafluoro-3-(quinoxalin-2-yl)propane-2,2-diol as a yellow oil (20 mg, 3%):  $^1\text{H}$  NMR (400 MHz,  $\text{CDCl}_3$ )  $\delta$  9.37 (s, 1H), 8.25 (dd,  $J = 8.2, 1.8$  Hz, 1H), 8.12 (dd,  $J = 8.1, 1.8$  Hz, 1H), 7.99–7.89 (m, 2H), 5.92 (s, 2H);  $^{13}\text{C}$  NMR (125 MHz,  $\text{CDCl}_3$ )  $\delta$  146.7 (t,  $J_{\text{CF}} = 29.1$  Hz, 1C), 143.6, 141.8 (t,  $J_{\text{CF}} = 5.1$  Hz, 1C), 139.0, 132.5, 132.1, 129.7, 128.9, 121.3 (q,  $J_{\text{CF}} = 288.3$  Hz, 1C), 113.1 (t,  $J_{\text{CF}} = 256.0$  Hz, 1C), 93.6 (ddt,  $J_{\text{CF}} = 32.6, 28.2, 4.8$  Hz, 1C);  $^{19}\text{F}$  NMR (376 MHz,  $\text{CDCl}_3$ )  $\delta$  -80.73 (t,  $J_{\text{FF}} = 10.9$  Hz, 3F), -111.80 (q,  $J_{\text{FF}} = 11.2$  Hz, 2F); IR (film)  $\nu_{\text{max}}$   $\text{cm}^{-1}$  3067.6, 1267.3, 1161.1, 1073.5; HRMS (ESI-TOF)  $m/z$  calcd for  $\text{C}_{11}\text{H}_6\text{F}_5\text{N}_2\text{O}_2$   $(\text{M}-\text{H})^-$  293.0349, found 293.0343.



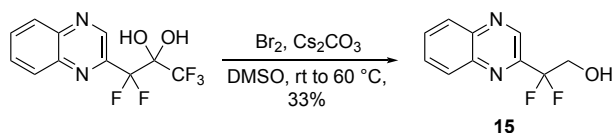

**2,2-Difluoro-2-(quinoxalin-2-yl)ethan-1-ol (15).** A mixture of activated 4Å molecular sieves (600 mg) and Cs<sub>2</sub>CO<sub>3</sub> (692 mg, 2.13 mmol) in DMSO (8.0 mL) was cooled to 10 °C and treated with the dropwise addition of bromine (90 μL, 1.8 mmol). After 15 min, a solution of the 1,1,1,3,3-pentafluoro-3-(quinoxalin-2-yl)propane-2,2-diol (50 mg, 0.17 mmol) in DMSO (1.0 mL) was added to the reaction mixture across 1 h via syringe pump. The reaction mixture was then stirred for 24 h at 60 °C. Next, the reaction mixture was cooled to rt, treated with saturated aqueous NH<sub>4</sub>Cl (15 mL), diluted EtOAc (50 mL), and stirred for 1 h. The resultant mixture was filtered through Celite, and the organics were washed with brine (4 × 25 mL), dried over Na<sub>2</sub>SO<sub>4</sub>, and concentrated under reduced pressure. Preparative TLC (10% *i*-PrOH, 40% CH<sub>2</sub>Cl<sub>2</sub>, 50% hexanes) afforded the title compound **15** as a yellow solid (11 mg, 31%): mp 99–100 °C; <sup>1</sup>H NMR (400 MHz, CDCl<sub>3</sub>) δ 9.25 (s, 1H), 8.20 (dd, *J* = 7.2, 2.3 Hz, 1H), 8.13 (dd, *J* = 8.0, 1.8 Hz, 1H), 7.91–7.83 (m, 2H), 4.41 (t, *J* = 12.4 Hz, 2H), 2.75 (brs, 1H); <sup>13</sup>C NMR (100 MHz, CDCl<sub>3</sub>) δ 148.2 (t, *J*<sub>CF</sub> = 30.1 Hz, 1C), 143.3, 142.5, 140.6, 131.8, 131.3, 129.7, 129.7, 118.3 (t, *J*<sub>CF</sub> = 243.6 Hz, 1C), 64.1 (t, *J*<sub>CF</sub> = 30.5 Hz, 1C); <sup>19</sup>F NMR (376 MHz, CDCl<sub>3</sub>) δ –106.11 (t, *J*<sub>HF</sub> = 12.5 Hz, 2F); IR (film) ν<sub>max</sub> 3259, 3060, 2967, 2924, 2853, 1498, 1256, 1088 cm<sup>-1</sup>; HRMS (ESI–TOF) *m/z* calcd for C<sub>10</sub>H<sub>9</sub>F<sub>2</sub>N<sub>2</sub>O [M+H]<sup>+</sup> 211.0683, found 211.0679.

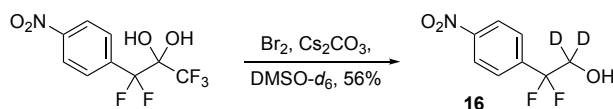

**1,1-Dideutero-2,2-difluoro-2-(4-nitrophenyl)ethan-1-ol (16).** A mixture of activated 4Å molecular sieves (100 mg) and Cs<sub>2</sub>CO<sub>3</sub> (115 mg, 0.350 mmol) in DMSO-*d*<sub>6</sub> (1.2 mL) was cooled to 10 °C and treated with the dropwise addition of bromine (17 μL, 0.33 mmol). After 15 min, a solution of the *gem*-diol<sup>1</sup> (10 mg, 0.035 mmol) in DMSO-*d*<sub>6</sub> (0.3 mL) was added to the reaction mixture across 1 h via syringe pump. The reaction mixture was then stirred for 24 h at 65 °C. Next, the reaction mixture was cooled to rt, treated with saturated aqueous NH<sub>4</sub>Cl (2 mL), diluted EtOAc (50 mL), and stirred for 1 h. The resultant mixture was filtered through Celite, and the organics were washed with brine (3 × 5 mL), dried over Na<sub>2</sub>SO<sub>4</sub>, and concentrated under reduced pressure. Preparative TLC (5% EtOAc in CHCl<sub>3</sub>) afforded the title compound **16** as a colorless solid (4 mg, 56%): mp 86–89 °C; <sup>1</sup>H NMR (500 MHz, CDCl<sub>3</sub>) δ 8.31 (d, *J* = 8.9 Hz, 2H), 7.73 (d, *J* = 8.9 Hz, 2H), 2.17 (br s, 1H); <sup>13</sup>C NMR (125 MHz, CDCl<sub>3</sub>) δ 149.1, 140.7 (t, *J*<sub>CF</sub> = 26.1 Hz, 1C), 127.0 (t, *J*<sub>CF</sub> = 6.1 Hz, 2C), 123.7 (2C), 119.6 (t, *J*<sub>CF</sub> = 244.8 Hz, 1C), 64.9 (m, 1C); <sup>19</sup>F NMR (471 MHz, CDCl<sub>3</sub>) δ –107.3; IR (film) ν<sub>max</sub> 3409, 3088, 2868, 1611, 1529, 1352, 1284, 1113 cm<sup>-1</sup>; HRMS (ESI–TOF) *m/z* calcd for C<sub>8</sub>H<sub>4</sub>D<sub>2</sub>F<sub>2</sub>NO<sub>3</sub> [M–H]<sup>-</sup> 204.0441, found 204.0418.

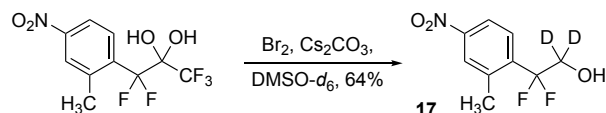

**1,1-Dideutero-2,2-difluoro-2-(2-methyl-4-nitrophenyl)ethan-1-ol (17).** A mixture of activated 4Å molecular sieves (200 mg) and Cs<sub>2</sub>CO<sub>3</sub> (170 mg, 0.522 mmol) in DMSO-*d*<sub>6</sub> (2 mL) was cooled to 10 °C and treated with the dropwise addition of bromine (25 μL, 0.49 mmol). After 15 min, a solution of the *gem*-diol<sup>1</sup> (15 mg, 0.05 mmol) in DMSO-*d*<sub>6</sub> (0.5 mL) was added to the reaction

mixture across 1 h via syringe pump. The reaction mixture was then stirred for 24 h at 65 °C. Next, the reaction mixture was cooled to rt, treated with saturated aqueous NH<sub>4</sub>Cl (5 mL), diluted EtOAc (50 mL), and stirred for 1 h. The resultant mixture was filtered through Celite, and the organics were washed with brine (3 × 5 mL), dried over Na<sub>2</sub>SO<sub>4</sub>, and concentrated under reduced pressure. Preparative TLC (5% EtOAc in CHCl<sub>3</sub>) afforded the title compound **17** as a colorless solid (7 mg, 64%): mp 107–108 °C; <sup>1</sup>H NMR (400 MHz, CDCl<sub>3</sub>) δ 8.10 (s, 1H), 8.09 (d, *J* = 8.3 Hz, 1H), 7.69 (d, *J* = 8.4 Hz, 1H), 2.59 (t, *J* = 2.4 Hz, 3H), 2.05 (br s, 1H); <sup>13</sup>C NMR (125 MHz, CDCl<sub>3</sub>) δ 148.9, 138.8 (t, *J* = 2.3 Hz), 138.7 (t, *J*<sub>CF</sub> = 24.4 Hz, 1C), 128.5 (t, *J*<sub>CF</sub> = 8.6 Hz, 1C), 126.8, 120.9 (t, *J*<sub>CF</sub> = 245.9 Hz, 1C), 120.9, 64.5 (m, 1C), 20.6 (t, *J*<sub>CF</sub> = 4.1 Hz, 1C); <sup>19</sup>F NMR (471 MHz, CDCl<sub>3</sub>) δ –104.3 (s, 2F); IR (film) ν<sub>max</sub> 3521, 3096, 2946, 1520, 1351 cm<sup>-1</sup>; HRMS (ESI–TOF) *m/z* calcd for C<sub>9</sub>H<sub>6</sub>F<sub>2</sub>D<sub>2</sub>NO<sub>3</sub> [M–H]<sup>-</sup> 218.0598, found 218.0605.

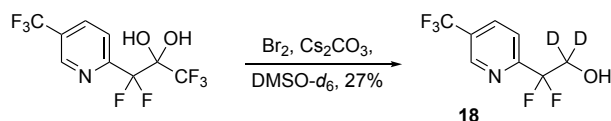

**1,1-Dideutero-2,2-difluoro-2-(5-(trifluoromethyl)pyridin-2-yl)ethan-1-ol (18).** A mixture of activated 4Å molecular sieves (150 mg) and Cs<sub>2</sub>CO<sub>3</sub> (208 mg, 0.638 mmol) in DMSO-*d*<sub>6</sub> (2 mL) was cooled to 10 °C and treated with the dropwise addition of bromine (25 μL, 0.48 mmol). After 15 min, a solution of the *gem*-diol<sup>1</sup> (15 mg, 0.05 mmol) in DMSO-*d*<sub>6</sub> (0.5 mL) was added to the reaction mixture across 1 h via syringe pump. The reaction mixture was then stirred for 24 h at 65 °C. Next, the reaction mixture was cooled to rt, treated with saturated aqueous NH<sub>4</sub>Cl (5 mL), diluted EtOAc (50 mL), and stirred for 1 h. The resultant mixture was filtered through Celite, and the organics were washed with brine (3 × 5 mL), dried over Na<sub>2</sub>SO<sub>4</sub>, and concentrated under reduced pressure. Preparative TLC (4% Et<sub>2</sub>O in CHCl<sub>3</sub>) afforded the title compound **18** as a colorless oil (3 mg, 27%): <sup>1</sup>H NMR (500 MHz, CDCl<sub>3</sub>) δ 8.91 (d, *J* = 2.5 Hz, 1H), 8.12 (d, *J* = 8.2 Hz, 1H), 7.88 (d, *J* = 8.2 Hz, 1H), 2.76 (br s, 1H); <sup>13</sup>C NMR (125 MHz, CDCl<sub>3</sub>) δ 156.9 (t, *J*<sub>CF</sub> = 30.2 Hz, 1C), 146.1 (q, *J* = 4.1 Hz, 1C), 135.0 (q, *J* = 3.6 Hz, 1C), 128.3 (q, *J*<sub>CF</sub> = 33.5 Hz, 1C), 122.9 (q, *J*<sub>CF</sub> = 272.9 Hz, 1C), 121.1 (t, *J*<sub>CF</sub> = 3.4 Hz), 117.8 (t, *J*<sub>CF</sub> = 243.9 Hz, 1C), 63.3 (m, 1C); <sup>19</sup>F NMR (471 MHz, CDCl<sub>3</sub>) δ –62.8 (s, 3F), –107.1 (s, 2F); IR (film) ν<sub>max</sub> 3343, 2918, 2850, 1724, 1609, 1398, 1332, 1143 cm<sup>-1</sup>; HRMS (ESI–TOF) *m/z* calcd for C<sub>8</sub>H<sub>5</sub>D<sub>2</sub>F<sub>5</sub>NO (M+H)<sup>+</sup> 230.0573, found 230.0572.

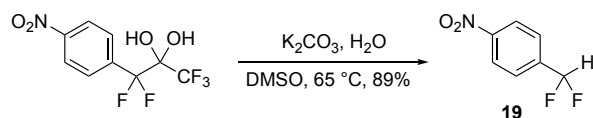

**1-(Difluoromethyl)-4-nitrobenzene (19).**<sup>6</sup> A solution of the *gem*-diol<sup>1</sup> (100 mg, 0.348 mmol) in DMSO (2.0 mL) was treated with H<sub>2</sub>O (19 μL) and K<sub>2</sub>CO<sub>3</sub> (194 mg, 1.40 mmol). The reaction mixture was stirred at 65 °C for 3 h. Next, the reaction mixture was cooled to rt, treated with saturated aqueous NH<sub>4</sub>Cl (2 mL), and extracted with CH<sub>2</sub>Cl<sub>2</sub> (5 × 5 mL). The organics were dried over Na<sub>2</sub>SO<sub>4</sub> and concentrated under reduced pressure. SiO<sub>2</sub> flash column chromatography (8:2 hexanes/EtOAc) afforded the title compound **19** as a colorless oil (54 mg, 89%): <sup>1</sup>H NMR (300 MHz, CDCl<sub>3</sub>) δ 8.33 (d, *J* = 8.9 Hz, 2H), 7.72 (d, *J* = 8.6 Hz, 2H), 6.65 (t, *J* = 55.7 Hz, 1H); <sup>19</sup>F NMR (282 MHz, CDCl<sub>3</sub>) δ –114.0 (d, *J*<sub>HF</sub> = 55.7 Hz, 2F). All spectral and characterization data matched the reported data.<sup>7</sup>

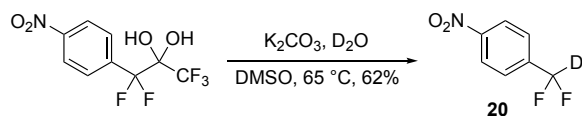

**1-(Deutrodifluoromethyl)-4-nitrobenzene (20).**<sup>6</sup> A solution of the *gem*-diol<sup>1</sup> (100 mg, 0.348 mmol) in DMSO (2.0 mL) was treated with D<sub>2</sub>O (19  $\mu$ L) and K<sub>2</sub>CO<sub>3</sub> (194 mg, 1.40 mmol). The reaction mixture was stirred at 65 °C for 30 min. Next, the reaction mixture was cooled to rt, treated with saturated aqueous NH<sub>4</sub>Cl (2 mL), and extracted with CH<sub>2</sub>Cl<sub>2</sub> (5  $\times$  5 mL). The organics were dried over Na<sub>2</sub>SO<sub>4</sub> and concentrated under reduced pressure. SiO<sub>2</sub> flash column chromatography (8:2 hexanes/EtOAc) afforded the title compound **20** as a colorless oil (38 mg, 62%): <sup>1</sup>H NMR (300 MHz, CDCl<sub>3</sub>)  $\delta$  8.33 (d, *J* = 9.0 Hz, 2H), 7.72 (d, *J* = 9.0 Hz, 2H); <sup>13</sup>C NMR (125 MHz, CDCl<sub>3</sub>)  $\delta$  149.3, 140.1 (t, *J*<sub>CF</sub> = 22.7 Hz, 1C), 126.8 (t, *J*<sub>CF</sub> = 5.9 Hz, 2C), 124.0 (2C), 112.8 (tt, *J*<sub>CF</sub> = 238.8, 28.4 Hz, 1C); <sup>19</sup>F NMR (282 MHz, CDCl<sub>3</sub>)  $\delta$  -114.5 (t, *J*<sub>DF</sub> = 8.5 Hz, 2F); IR (film)  $\nu_{\text{max}}$  1529, 1351, 1277 cm<sup>-1</sup>; HRMS (CI-Q) *m/z* calcd. for C<sub>7</sub>H<sub>4</sub>DF<sub>2</sub>NO<sub>2</sub> [M]<sup>+</sup>, 174.0351; found, 174.0353.

## II. Computations

Geometry optimization and frequency calculations were performed with the Gaussian 09<sup>8</sup> software package using hybrid density functional theory<sup>9</sup> with the M06-2X<sup>10</sup> level of theory and 6-311++G(3df, 3pd) basis set. Integral calculations utilized an UltraFine grid. and Cartesian coordinates were utilized in. all cases, except that a Z-matrix was used for (bromo(methyl)sulfonio)methanolate. Calculations included DMSO solvent effects using the Polarizable Continuum Model (PCM) with the integral equation formalism variant (IEFPCM). No imaginary frequencies were observed for the obtained minima. Free energies (G) and enthalpies (H) are reported in atomic units at 298.15 K (Table S1) and include the zero-point energy. The concerted fragmentation process has the lowest energies compared to both the reversible and the stepwise fragmentation processes (Figure S1).

**Table S2.** Free energies (G) and enthalpies (H) of intermediates and products in the proposed mechanism.

| Compound        | G (au)       | H (au)       |
|-----------------|--------------|--------------|
|                 | -3315.295323 | -3315.247698 |
|                 | -741.305751  | -741.262752  |
| Br <sub>2</sub> | -5148.358075 | -5148.330310 |

|                 |              |              |
|-----------------|--------------|--------------|
|                 | -114.494958  | -114.470157  |
| CO <sub>2</sub> | -188.600670  | -188.576452  |
|                 | -3012.257250 | -3012.223359 |
| Br <sup>⊖</sup> | -2574.376153 | -2574.357617 |
|                 | -3126.697791 | -3126.656971 |

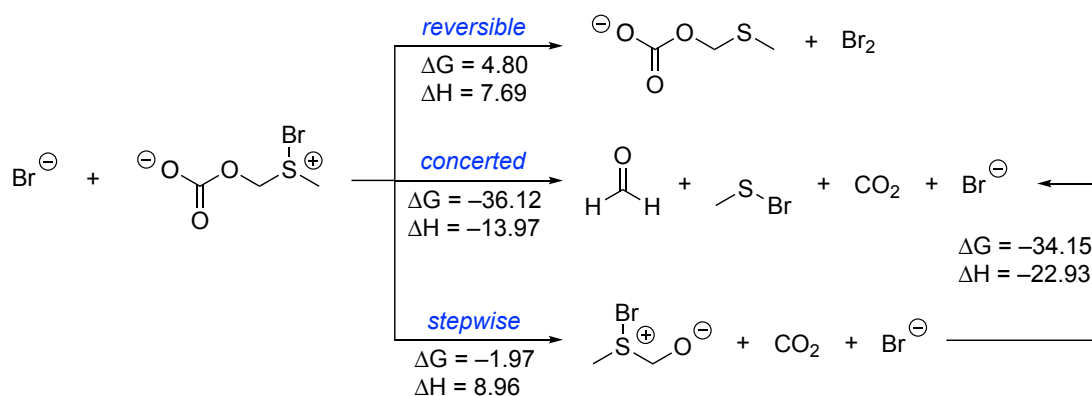

**Figure S1.** Free energies (G) and enthalpies (H) of the three investigated processes (in kcal/mol at 298.15K).

### III. References

1. H. R. Khatri, C. Han, E. Luong, X. Pan, A. T. Adam, M. D. Alshammari, Y. Shao and D. A. Colby, *J. Org. Chem.*, 2019, **84**, 11665–11675.
2. C. Han, E. H. Kim and D. A. Colby, *J. Am. Chem. Soc.*, 2011, **130**, 5802–5805.
3. J. P. John and D. A. Colby, *J. Org. Chem.*, 2011, **76**, 9163–9168.
4. A. L. Nguyen, H. R. Khatri, J. R. Woods, C. S. Baldwin, F. R. Fronczek and D. A. Colby, *J. Org. Chem.*, 2018, **83**, 3109–3118.
5. Eto, H.; Kaneko, Y.; Sakamoto, T. *Chem. Pharm. Bull.* **2000**, *48*, 982–990.
6. C. Han, Discovery of the Trifluoroacetate Release Process and Its Strategic Application Toward the Synthesis of Biologically Active Molecules. Ph.D. Dissertation, Purdue University: West Lafayette, IN, 2013.
7. H. Motohashi and K. Mikami, *Org. Lett.* **2018**, *20*, 5340–5343.
8. M. J. Frisch, G. W. Trucks, H. B. Schlegel, G. E. Scuseria, M. A. Robb, J. R. Cheeseman, G. Scalmani, V. Barone, B. Mennucci, G. A. Petersson, H. Nakatsuji, M. Caricato, X. Li, H. P.

Hratchian, A. F. Izmaylov, J. Bloino, G. Zheng, J. L. Sonnenberg, M. Hada, M. Ehara, K. Toyota, R. Fukuda, J. Hasegawa, M. Ishida, T. Nakajima, Y. Honda, O. Kitao, H. Nakai, T. Vreven, J. A. Montgomery, Jr. J. E. Peralta, F. Ogliaro, M. Bearpark, J. J. Heyd, E. Brothers, K. N. Kudin, V. N. Staroverov, T. Keith, R. Kobayashi, J. Normand, K. Raghavachari, A. Rendell, J. C. Burant, S. S. Iyengar, J. Tomasi, M. Cossi, N. Rega, J. M. Millam, R. E. Klene, J. E. Knox, J. B. Cross, V. Bakken, C. Adamo, J. Jaramillo, R. Gomperts, R. E. Stratmann, O. Yazyev, A. J. Austin, R. Cammi, C. Pomelli, J. W. Ochterski, R. L. Martin, K. Morokuma, V. G. Zakrzewski, G. A. Voth, P. Salvador, J. J. Dannenberg, S. Dapprich, A. D. Daniels, Ö. Farkas, J. B. Foresman, J. V. Ortiz, J. Cioslowski, D. J. Fox, Gaussian 09, Revision D.01. Gaussian, Inc., Wallingford CT, 2013.

9. A. D. Becke, *J. Chem. Phys.*, 2014, **140**, 18A301.

10. Y. Zhao, D. G. Truhlar, *Theor. Chem. Acc.*, 2008, **120**, 215–241.

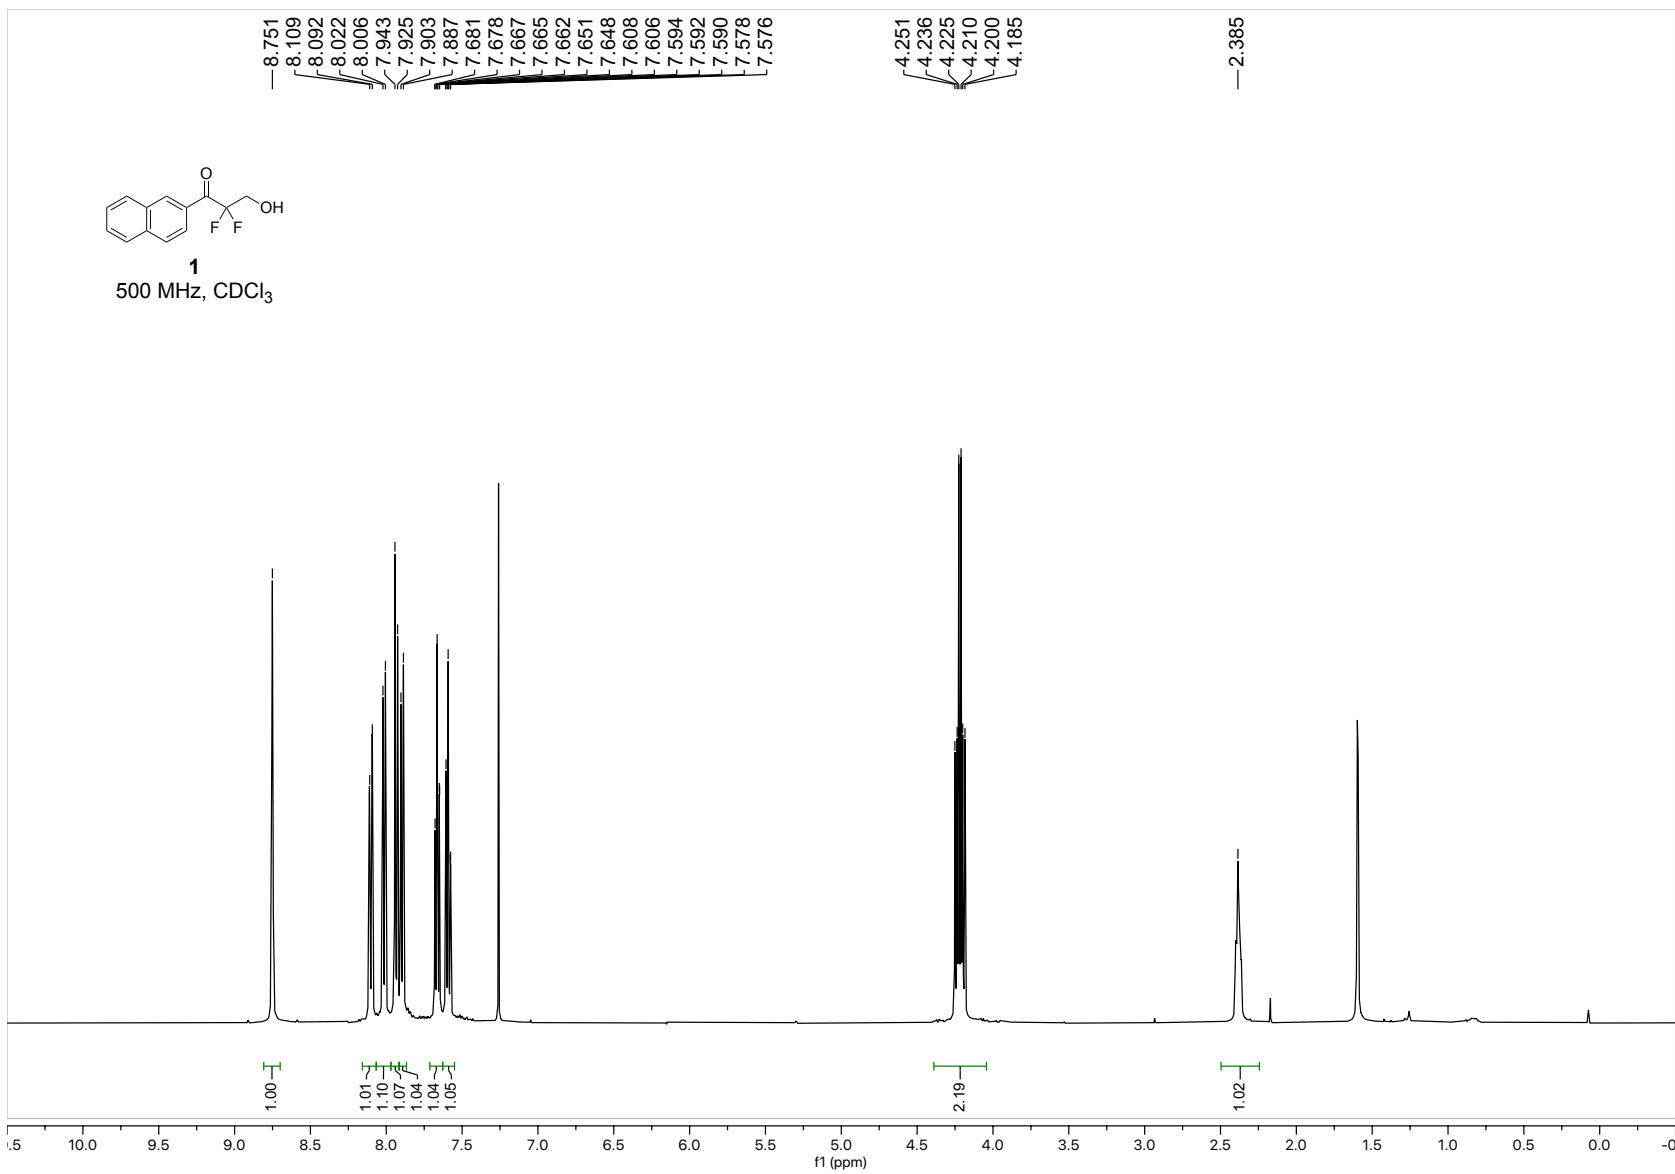

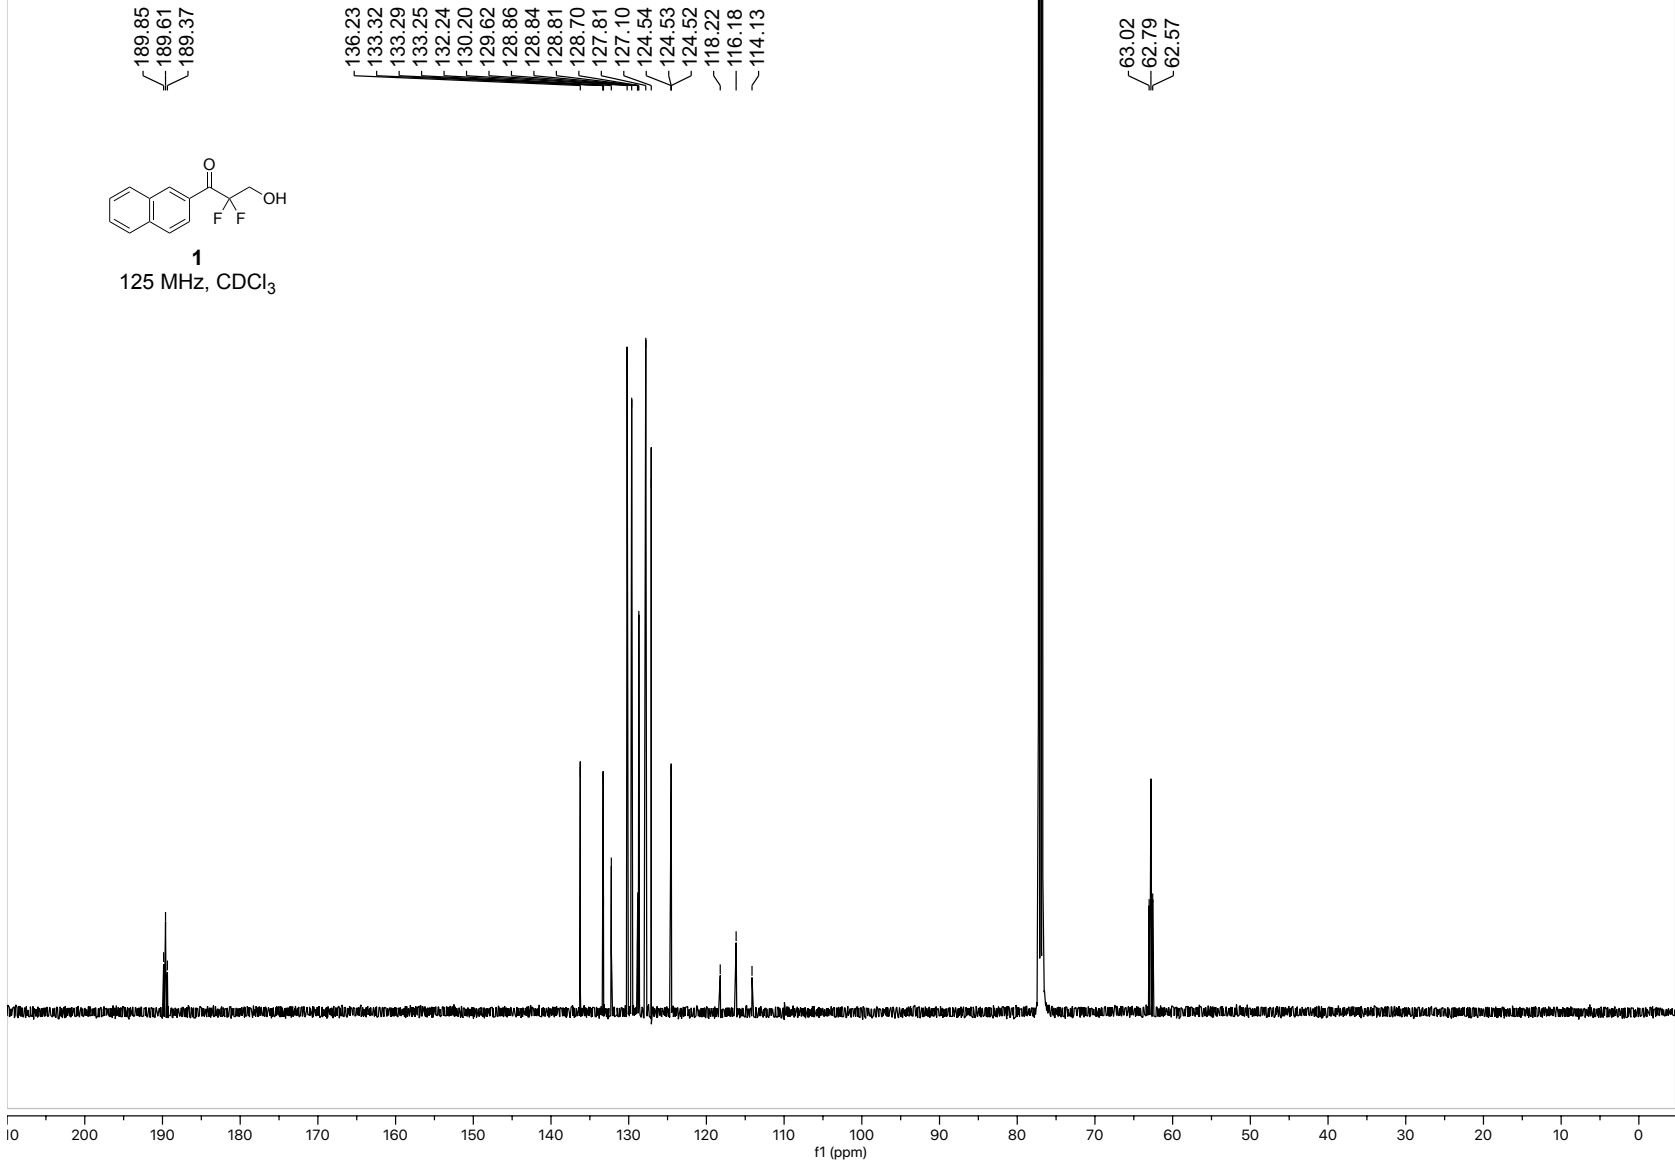

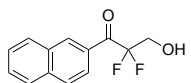

**1**  
376 MHz, CDCl<sub>3</sub>

-109.05  
-109.08  
-109.12

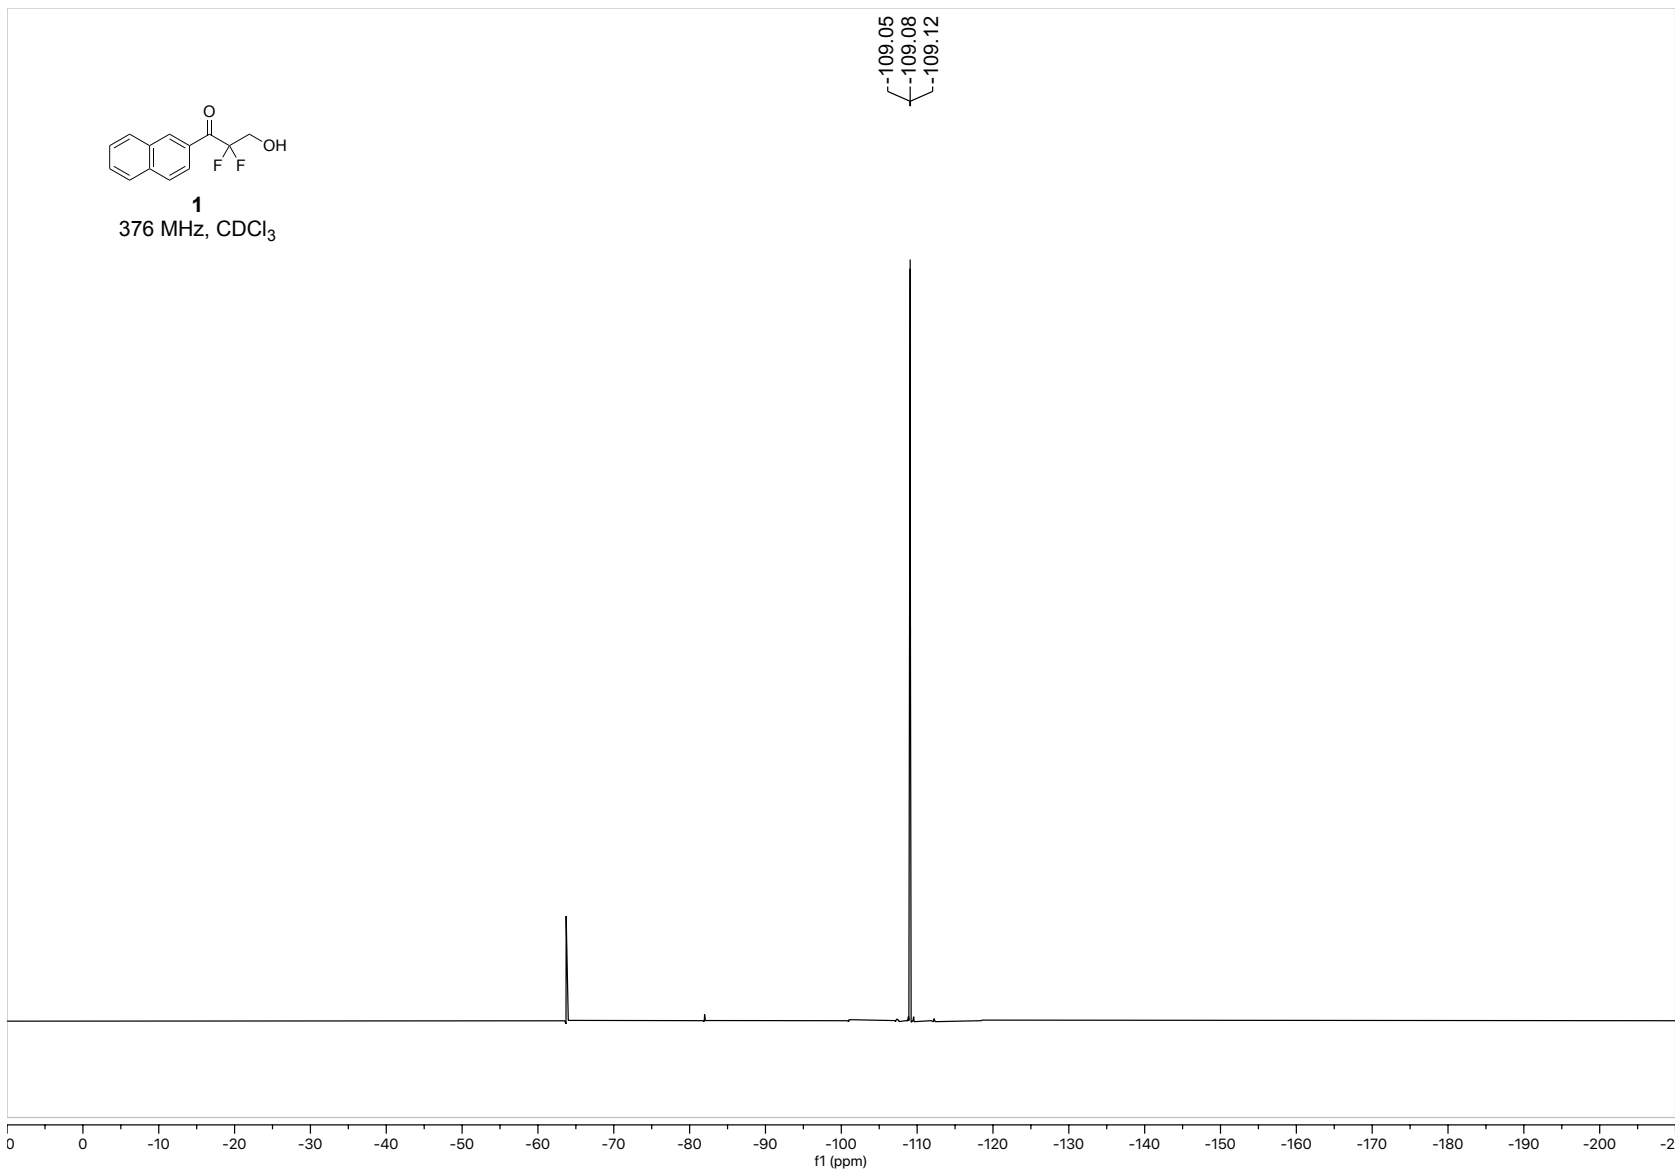



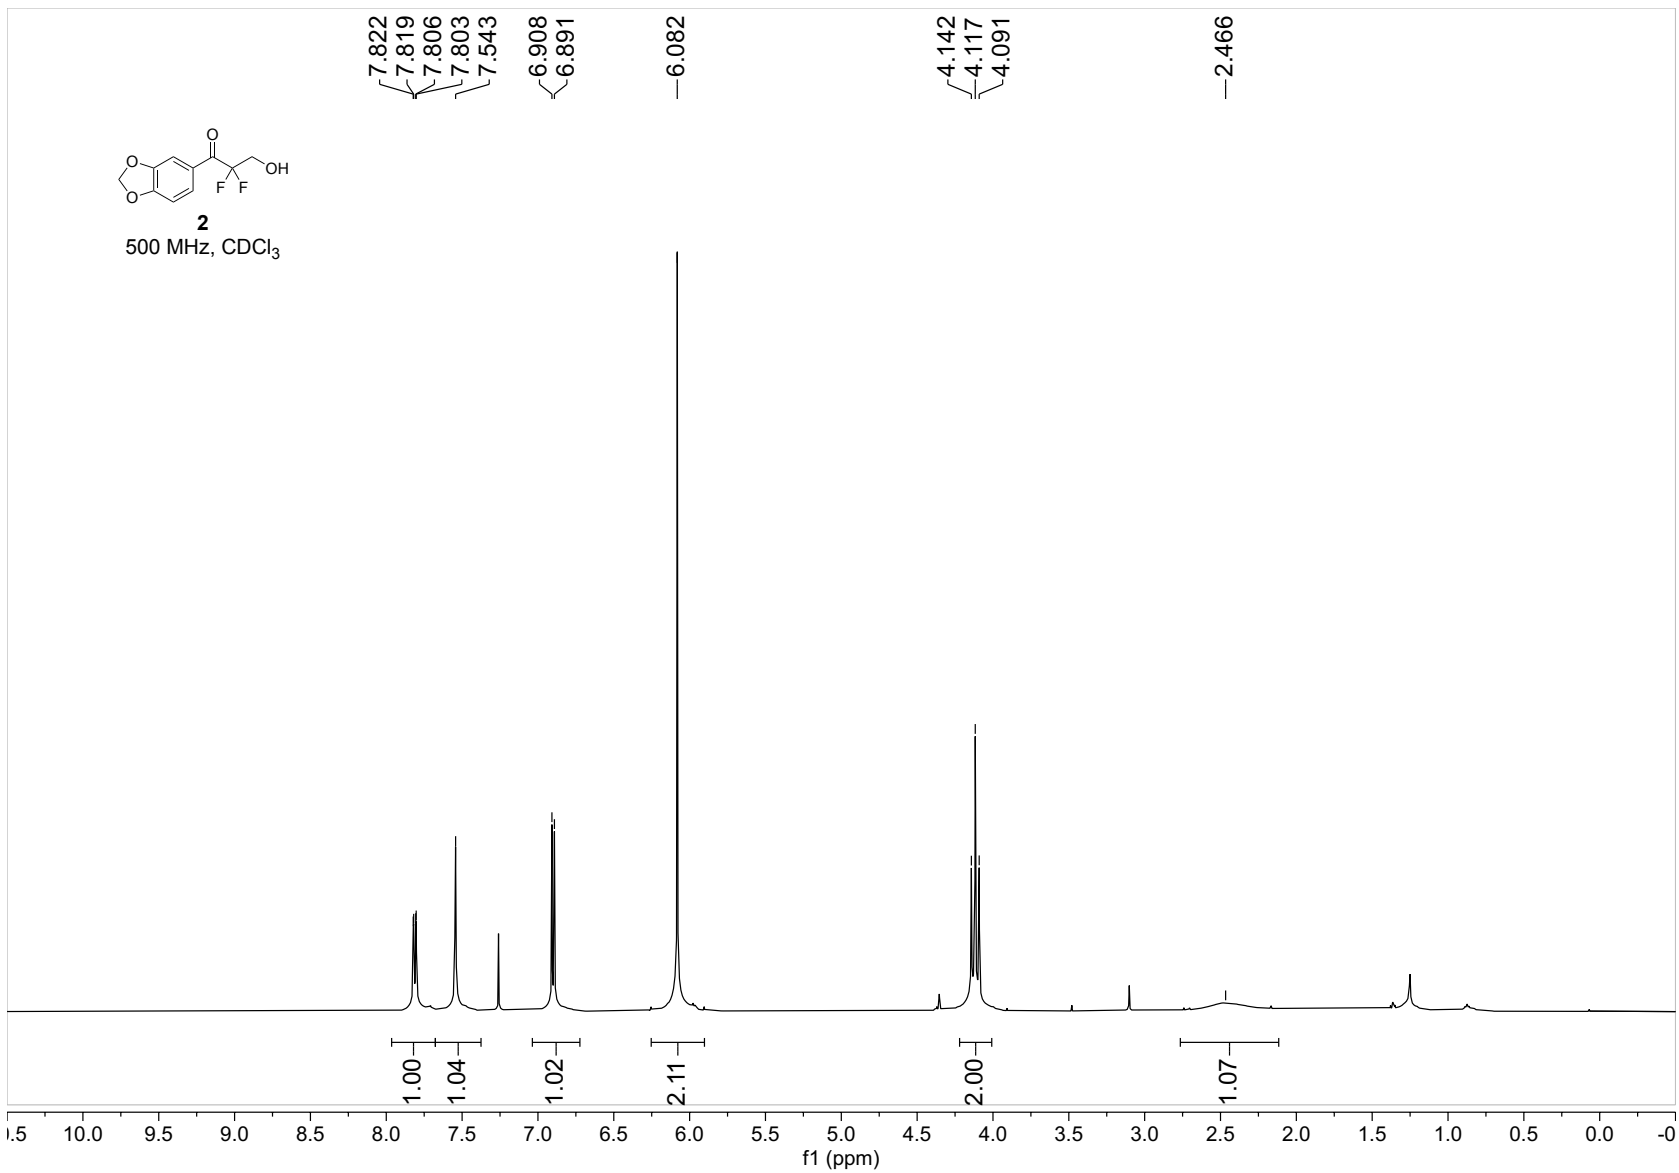

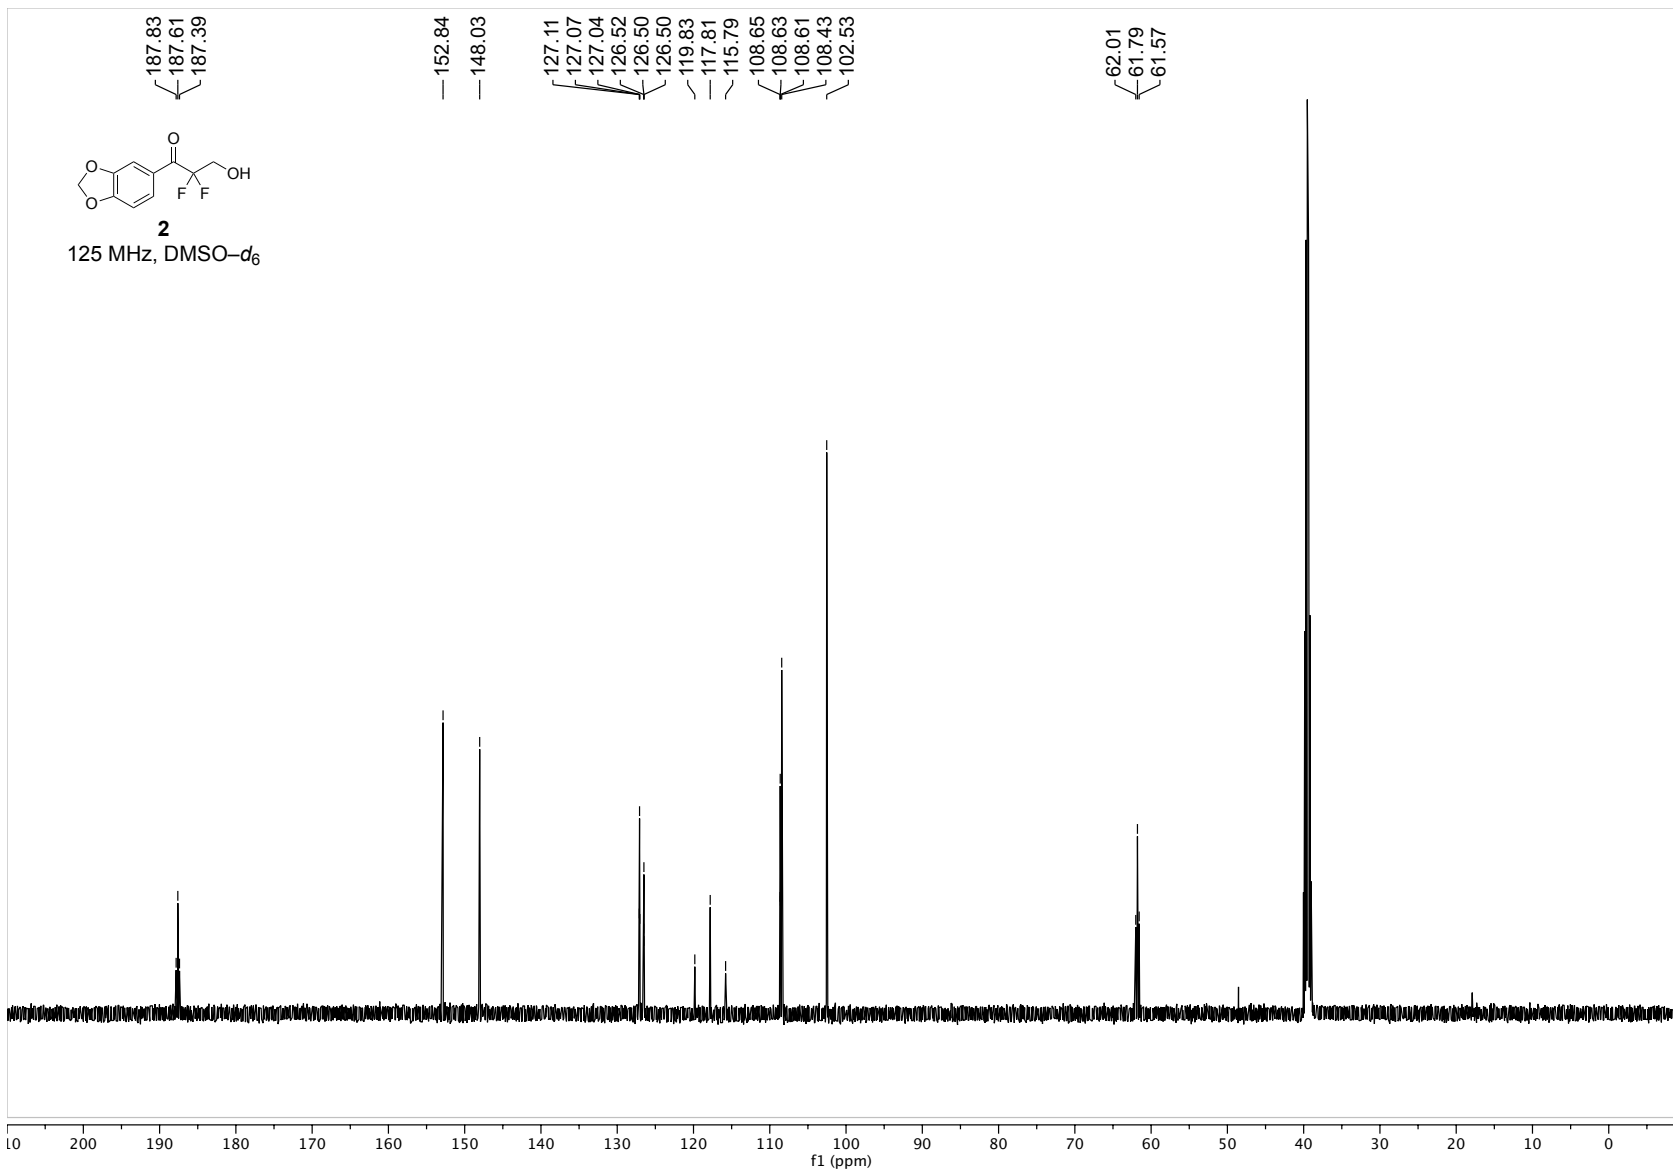

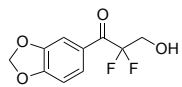

**2**  
471 MHz, CDCl<sub>3</sub>

107.96  
107.98  
108.01

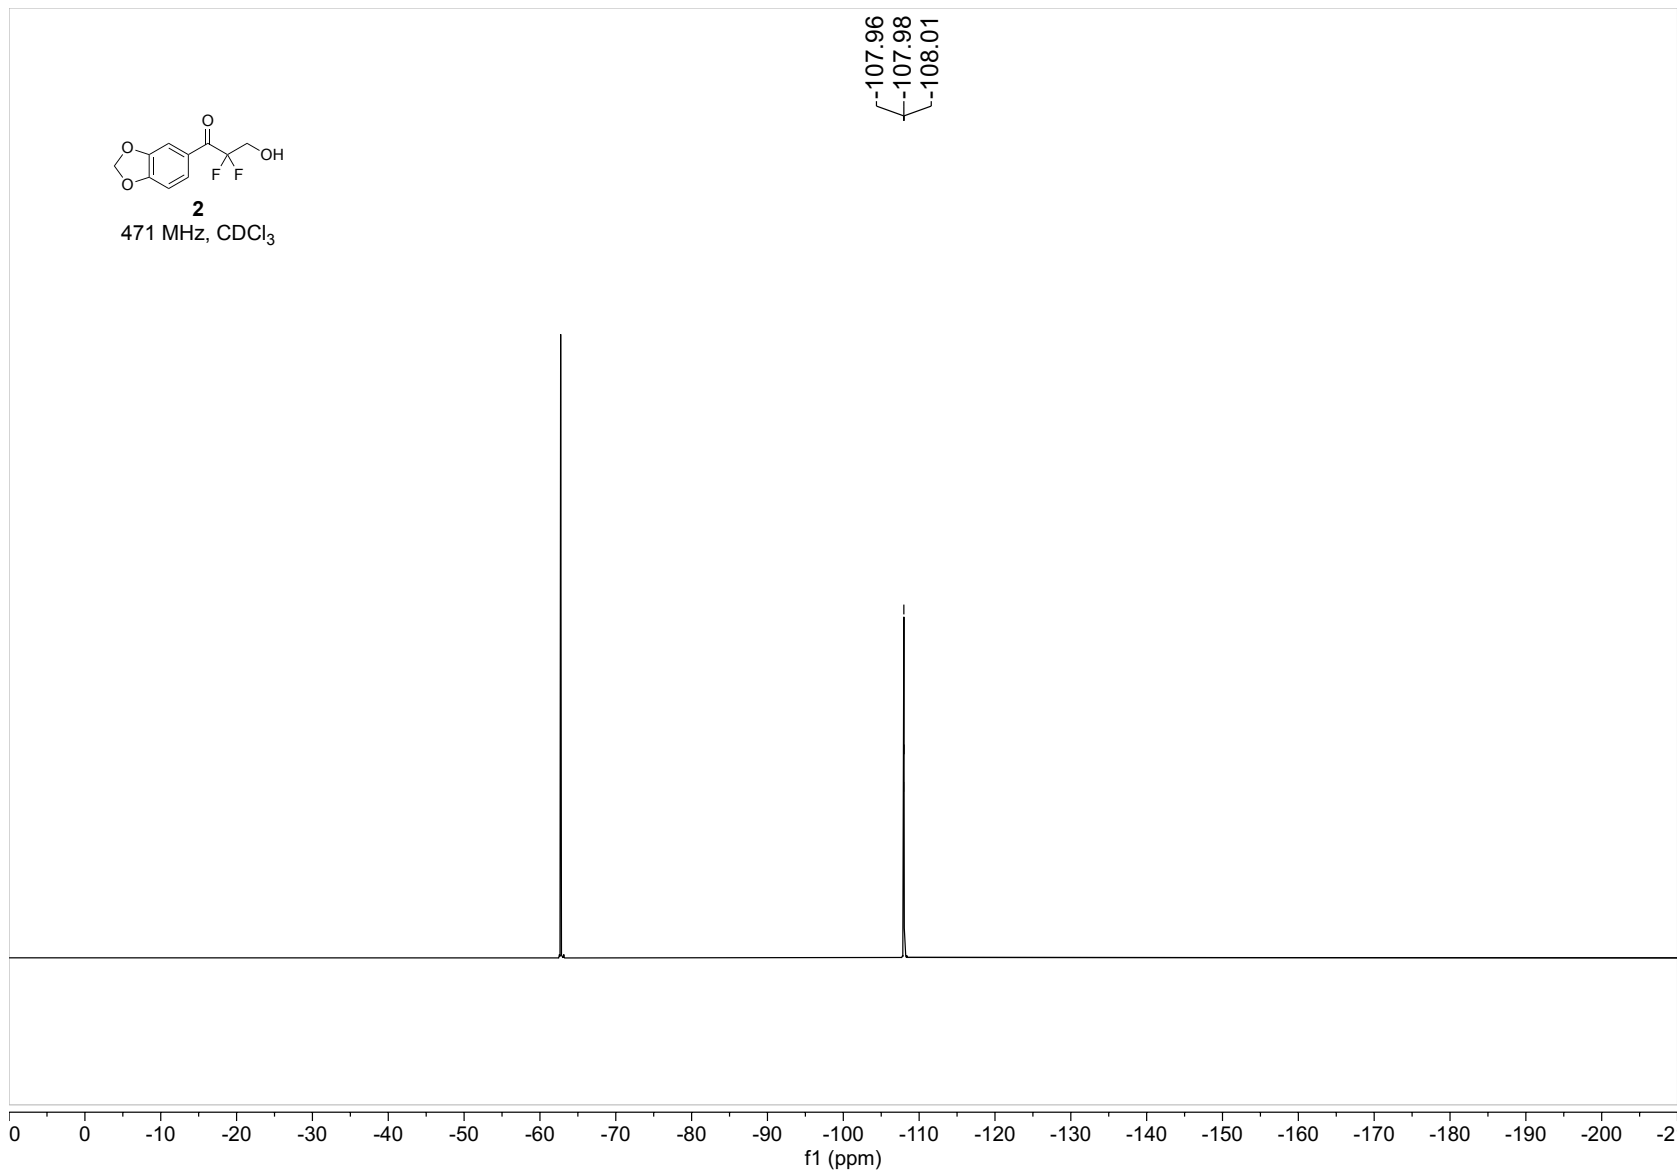

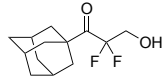

**3**  
500 MHz, CDCl<sub>3</sub>

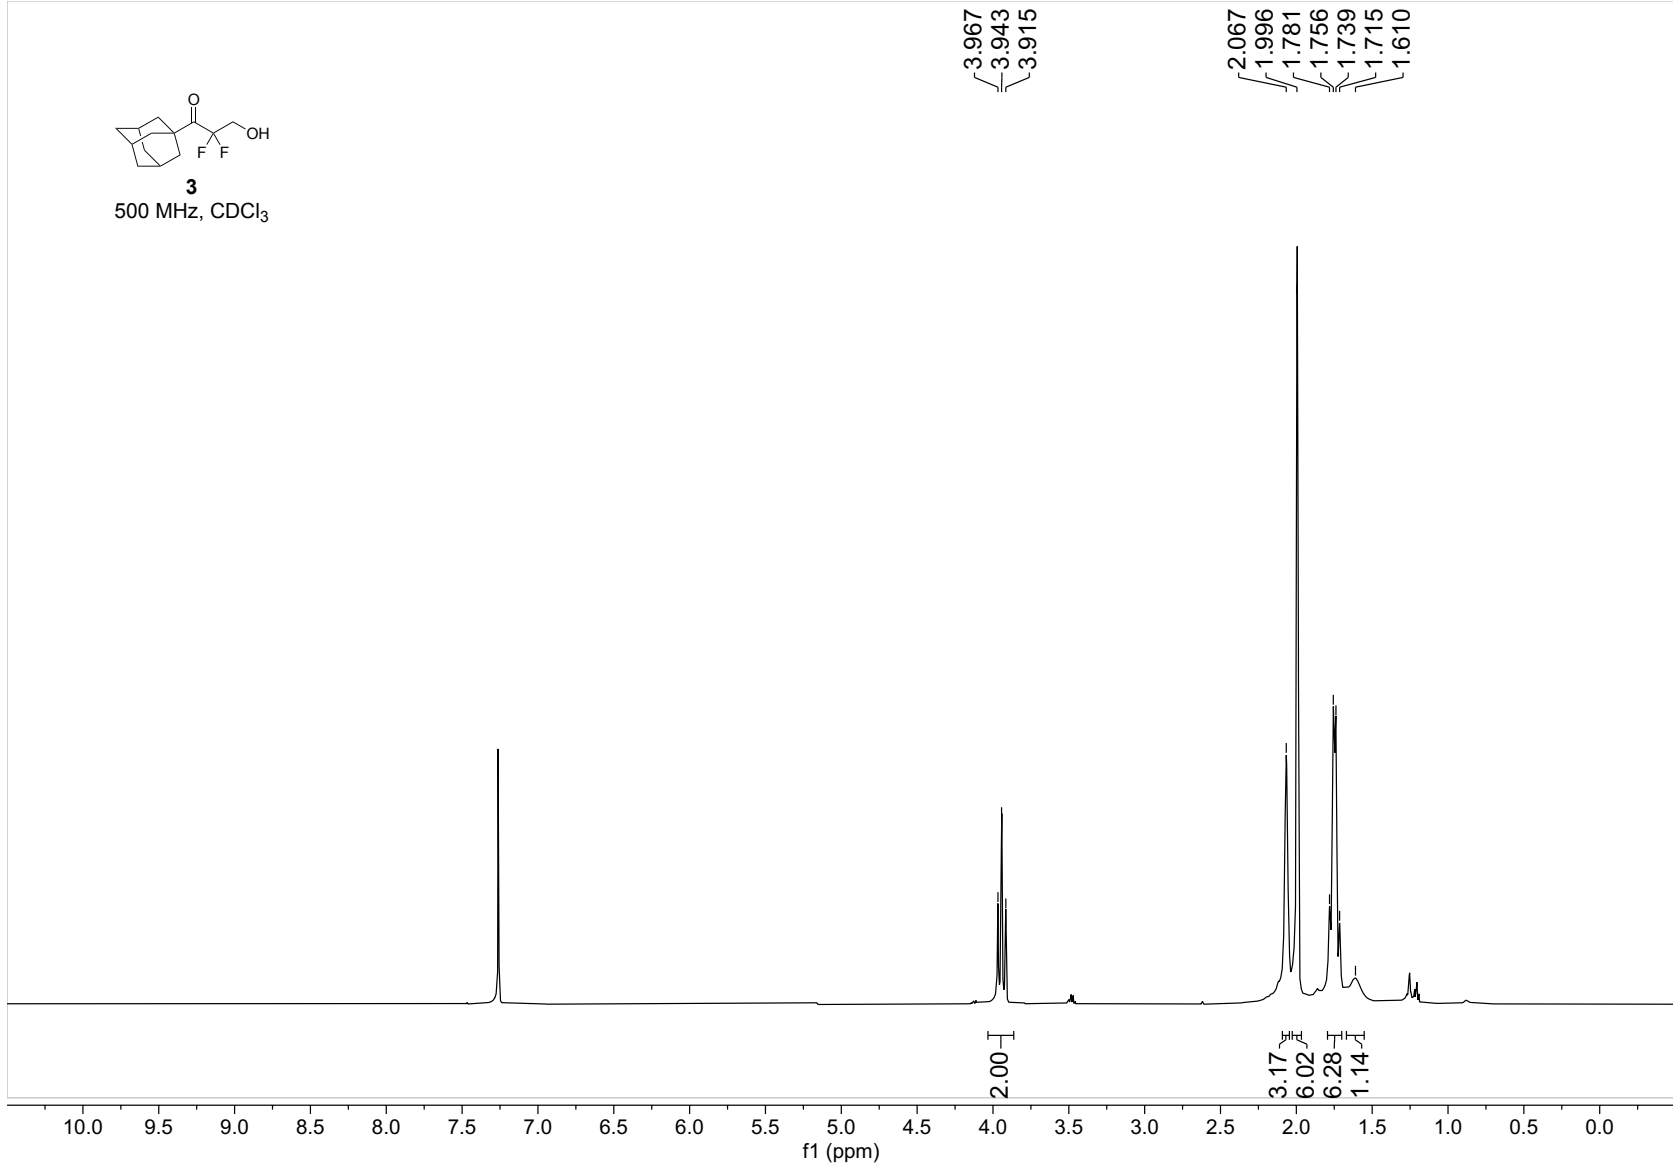

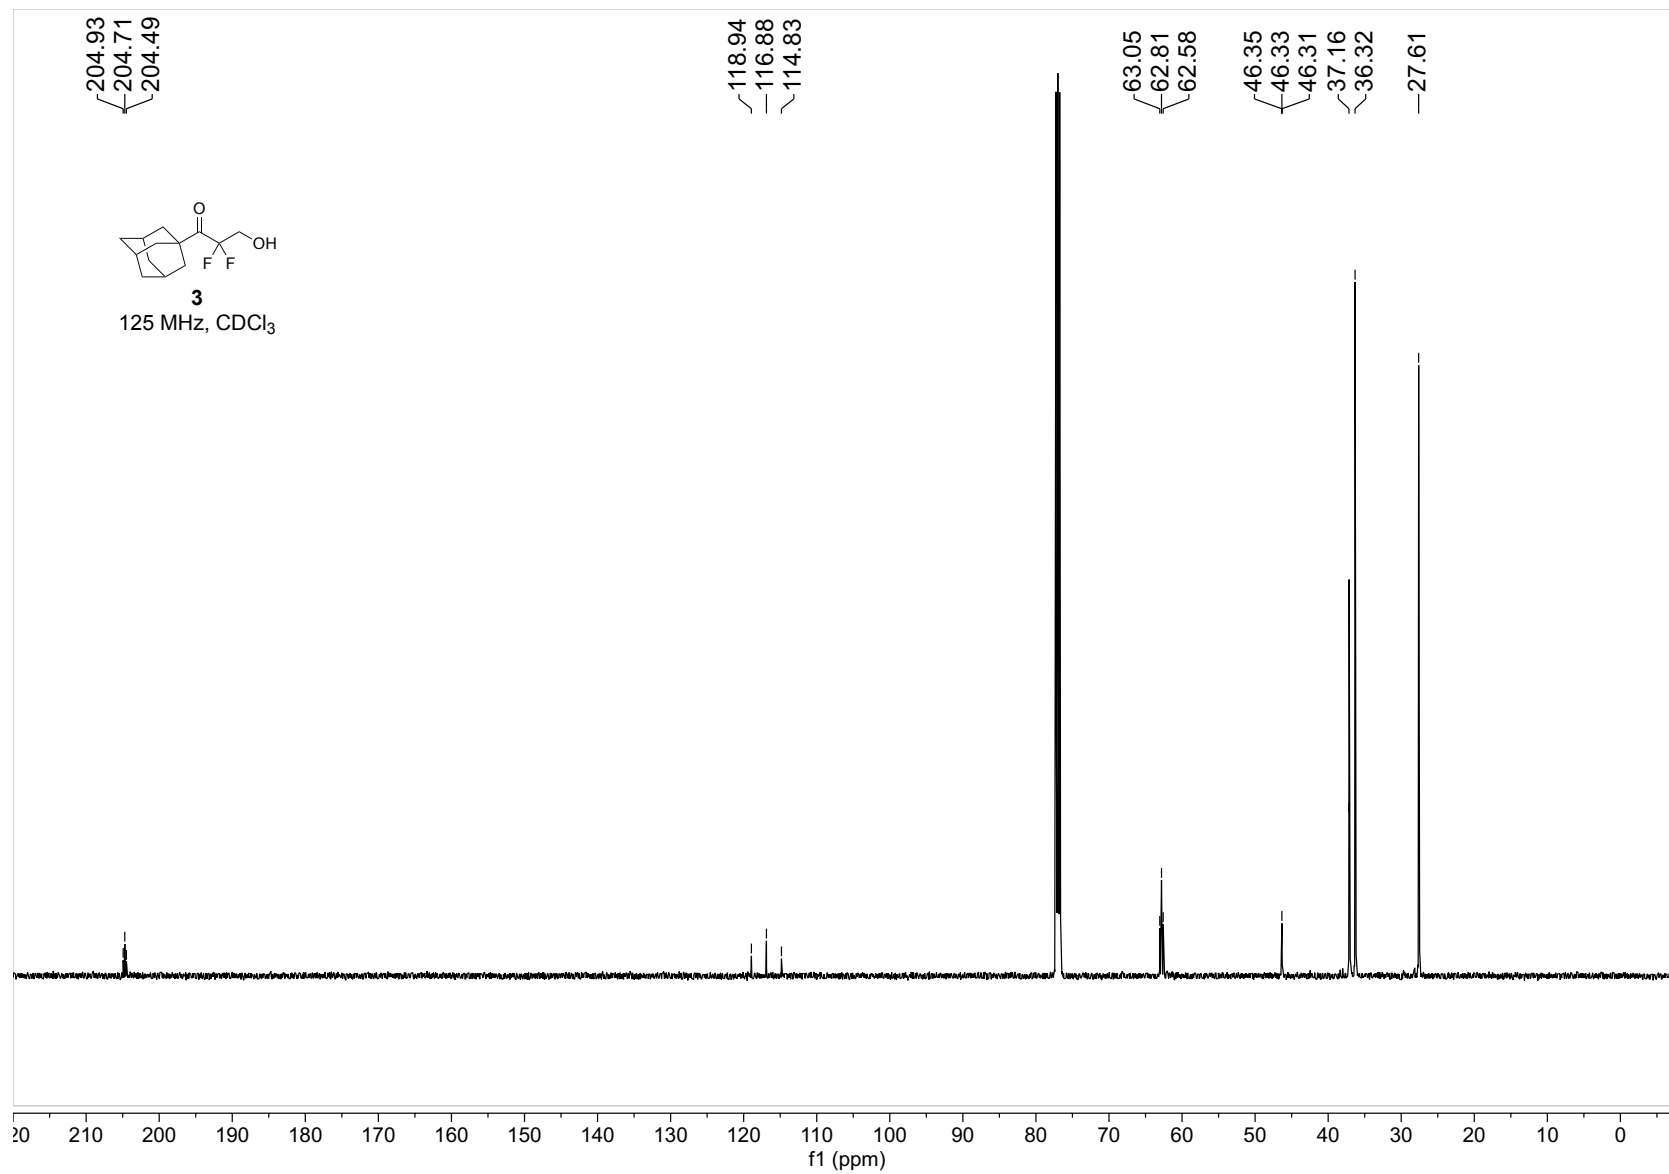

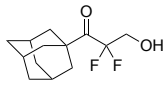

**3**

471 MHz, CDCl<sub>3</sub>

-111.27  
-111.30  
-111.33

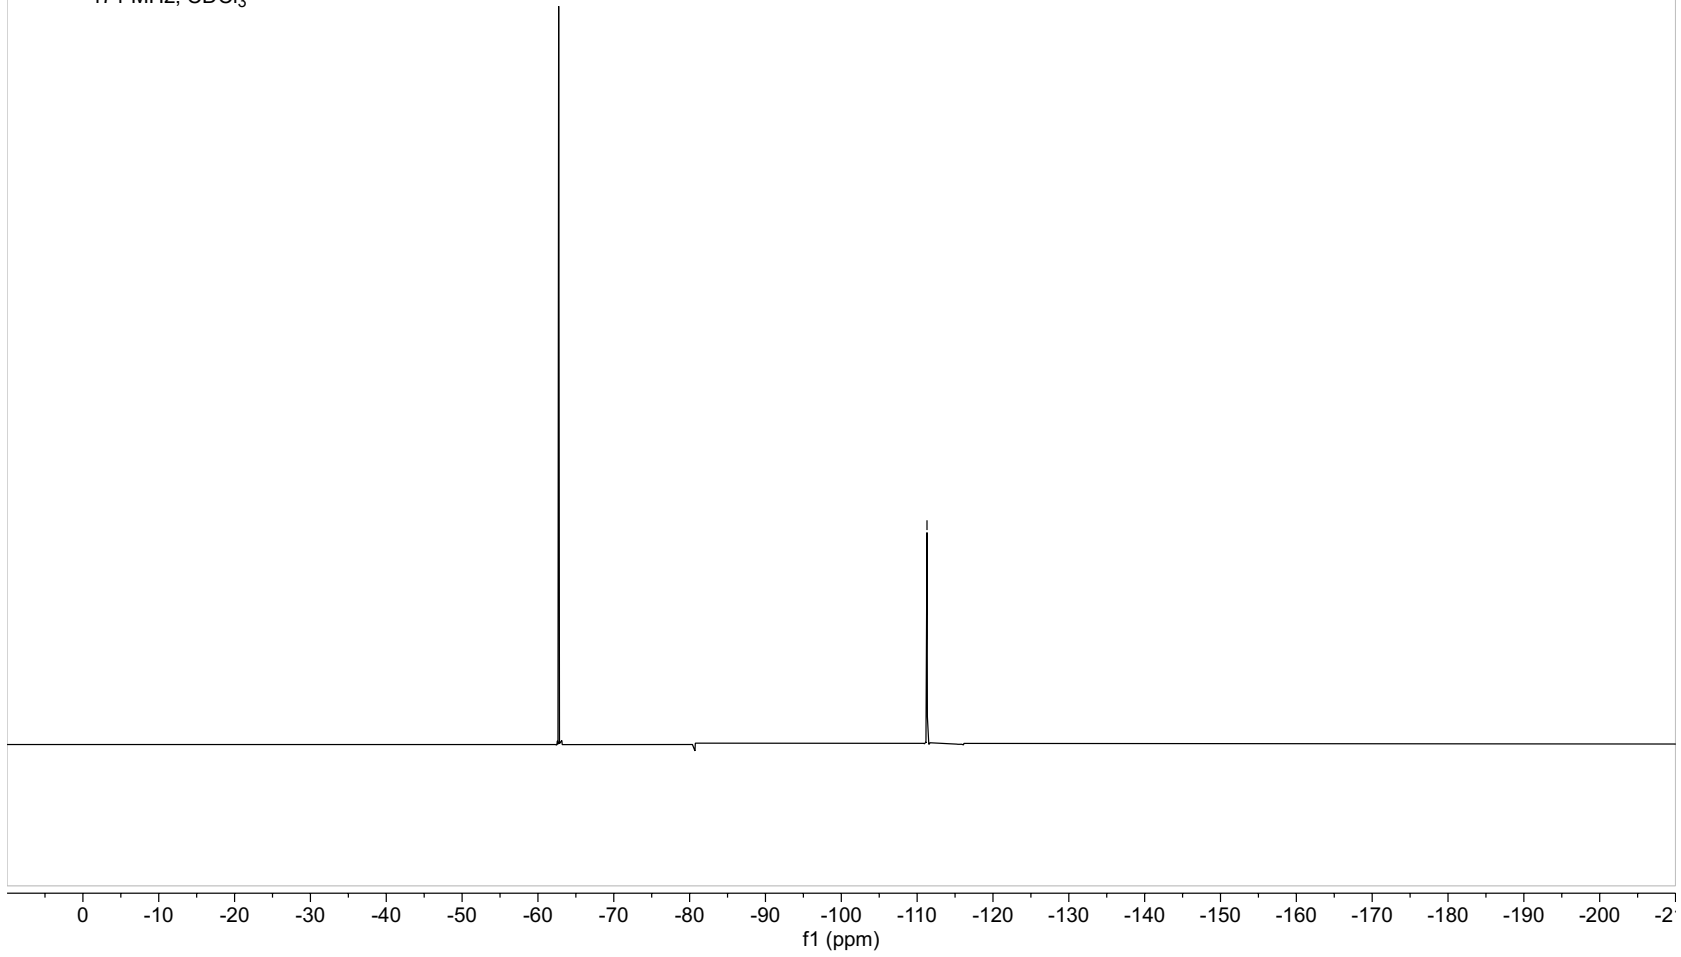

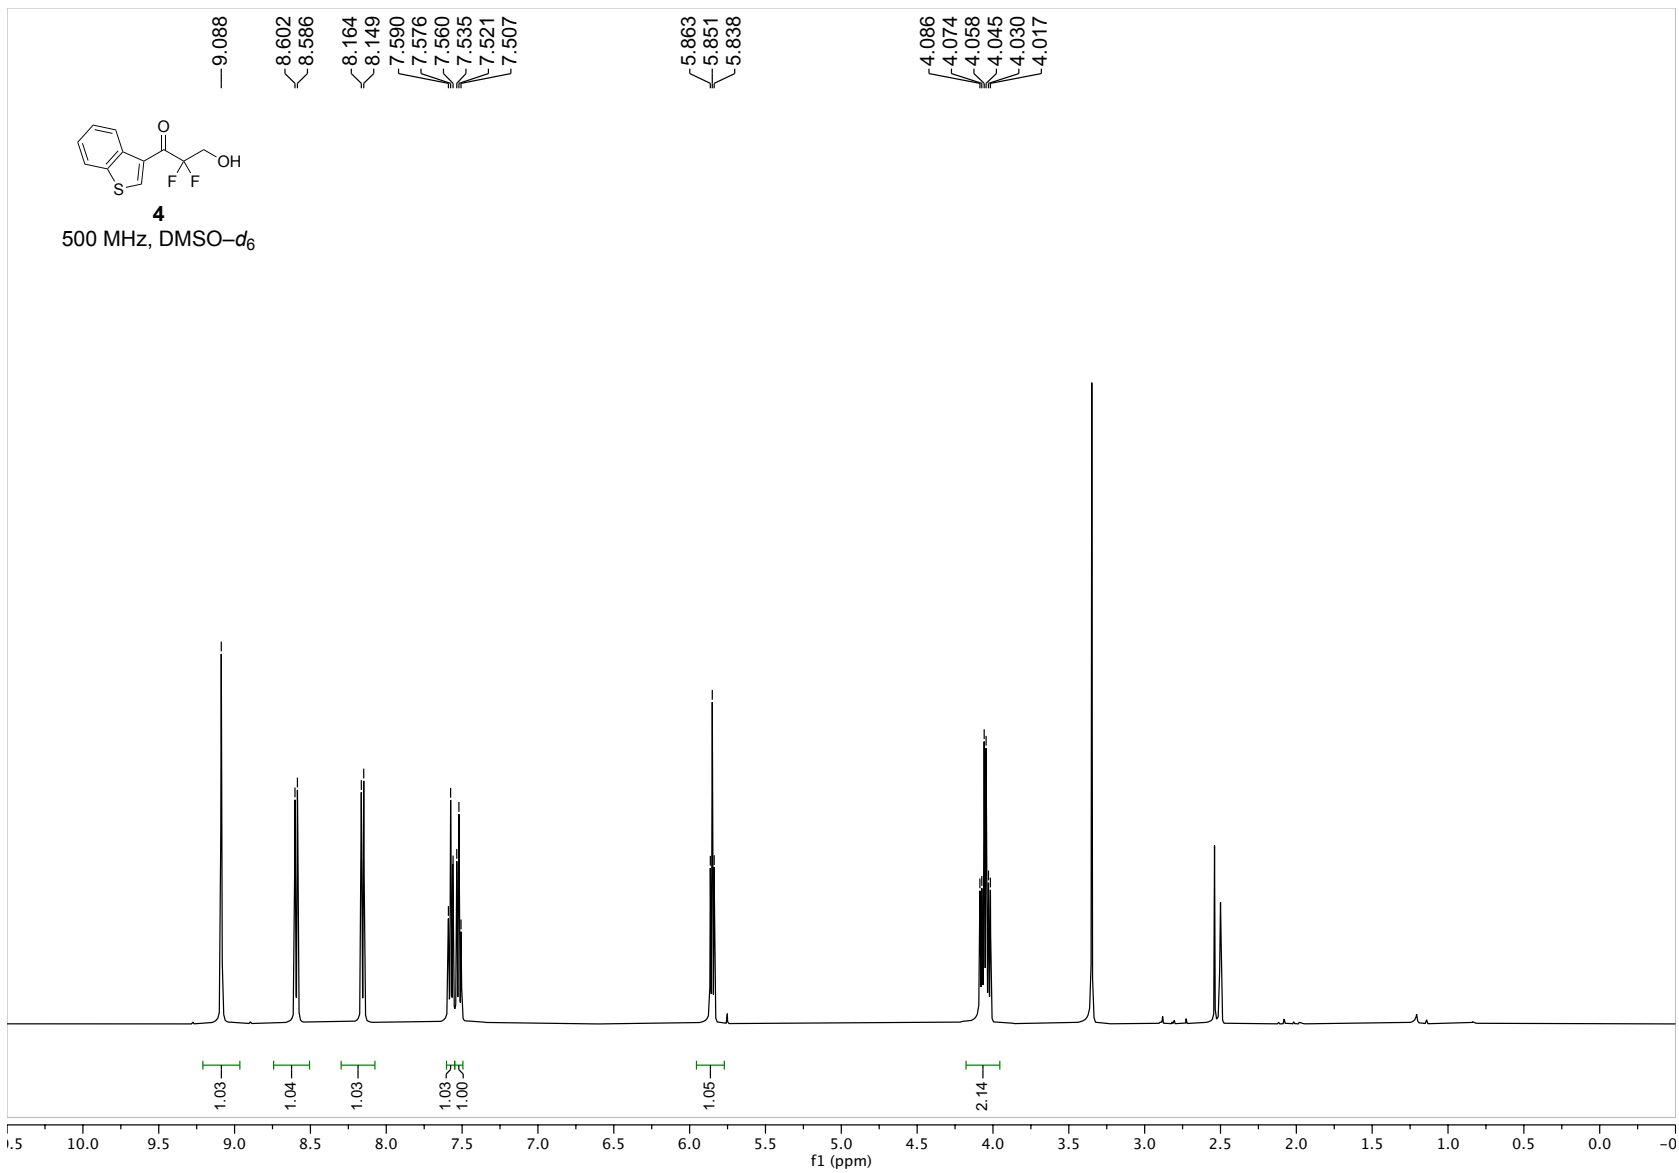

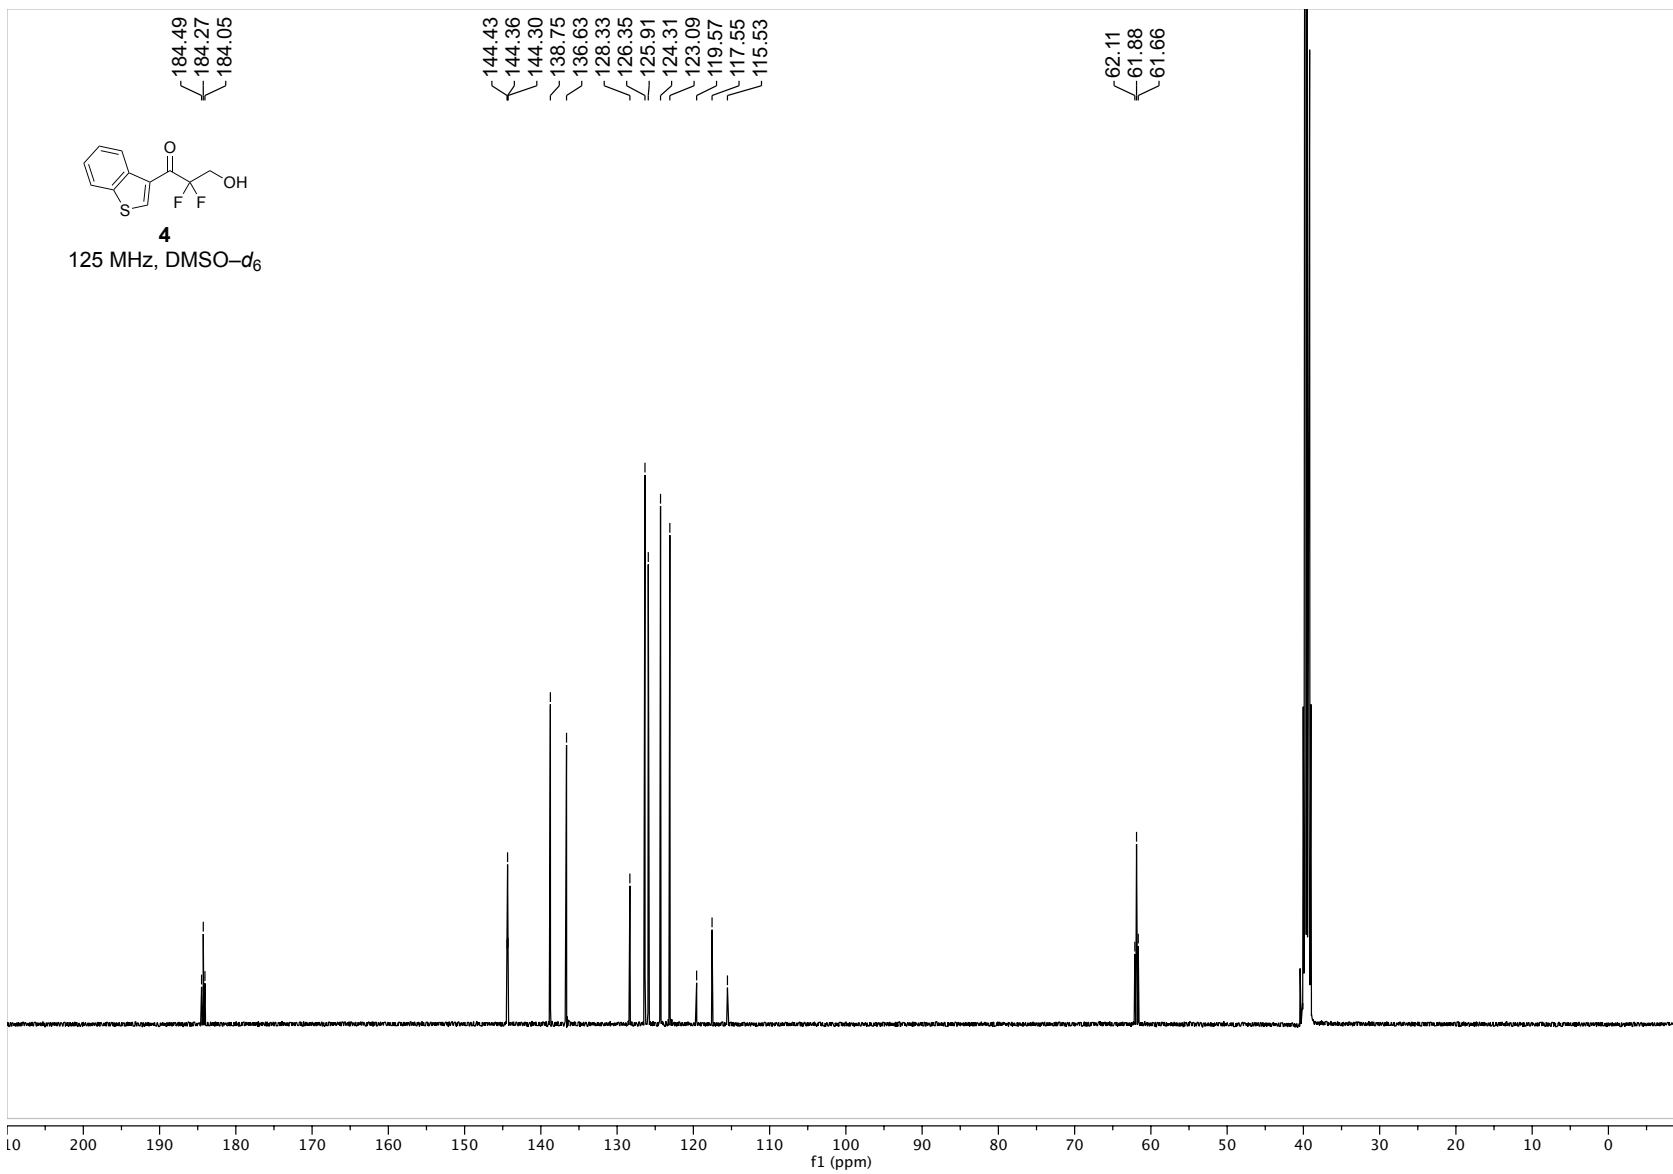



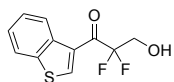

**4**

471 MHz, CDCl<sub>3</sub>

107.83  
107.86  
107.89

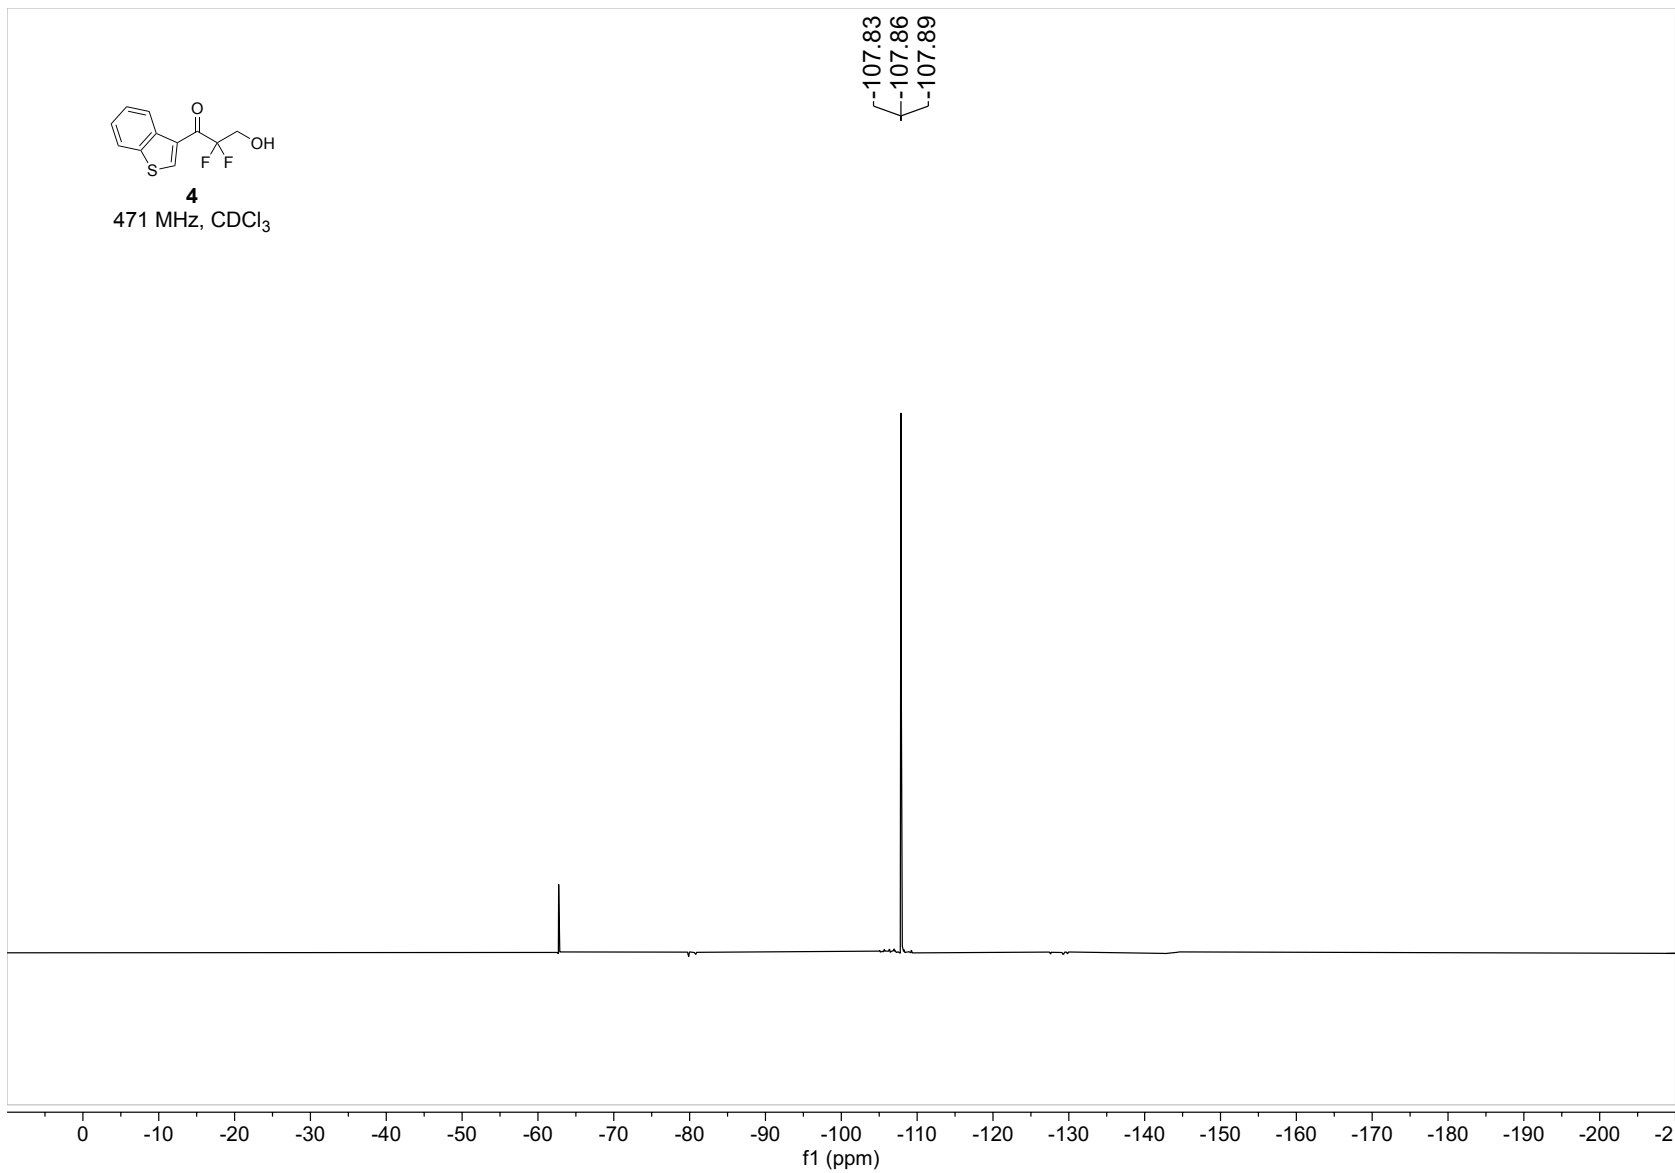

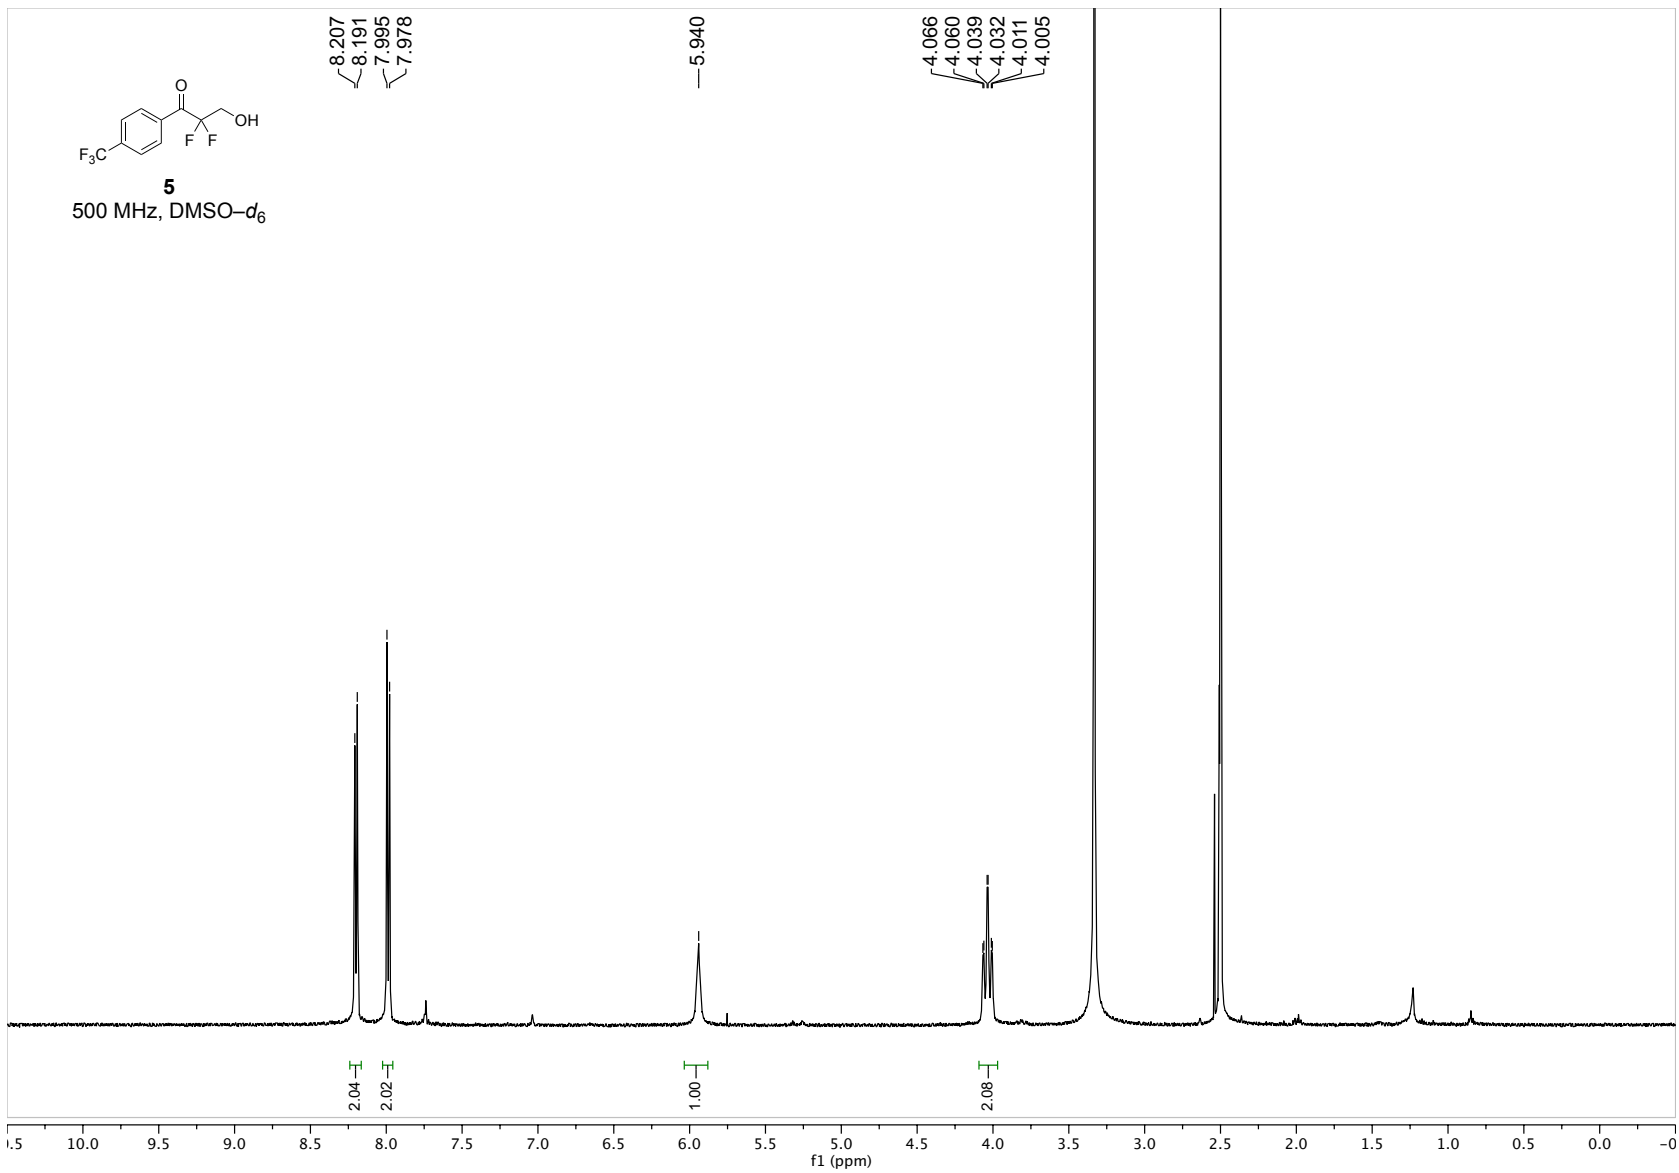

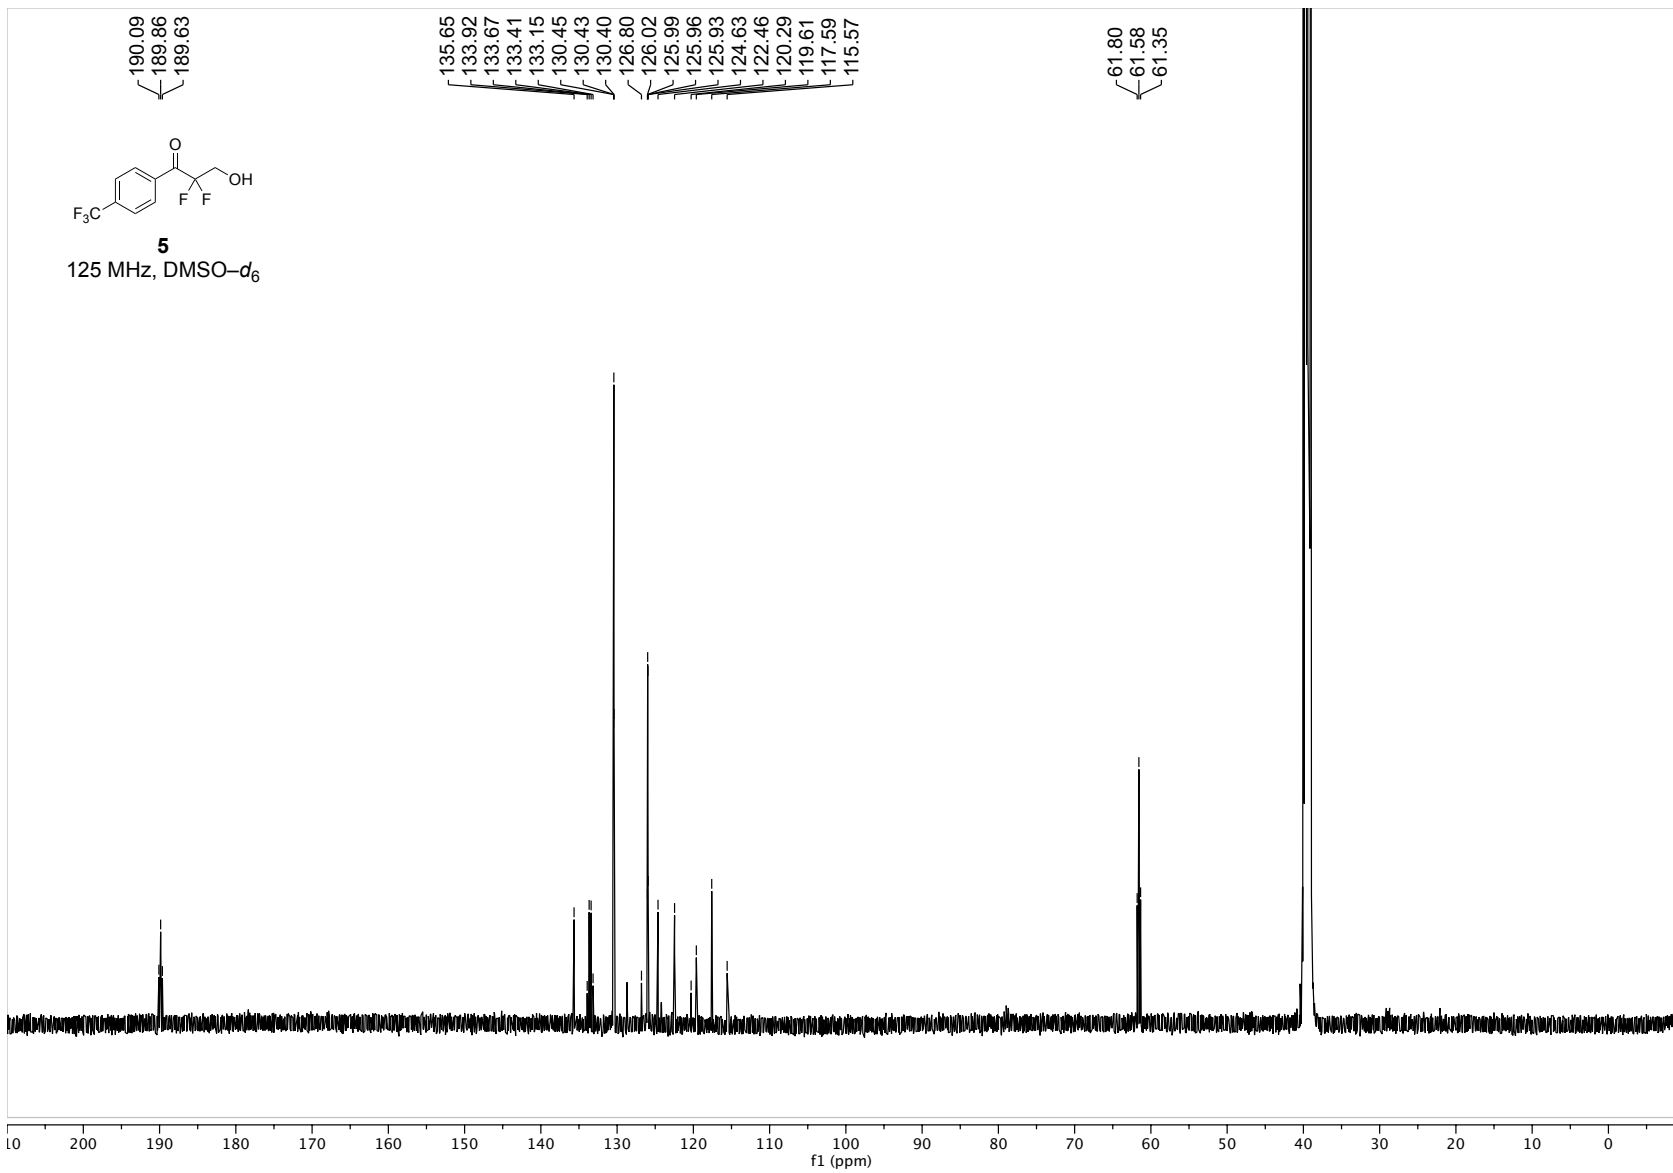

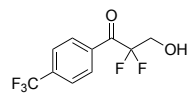

**5**

471 MHz, CDCl<sub>3</sub>

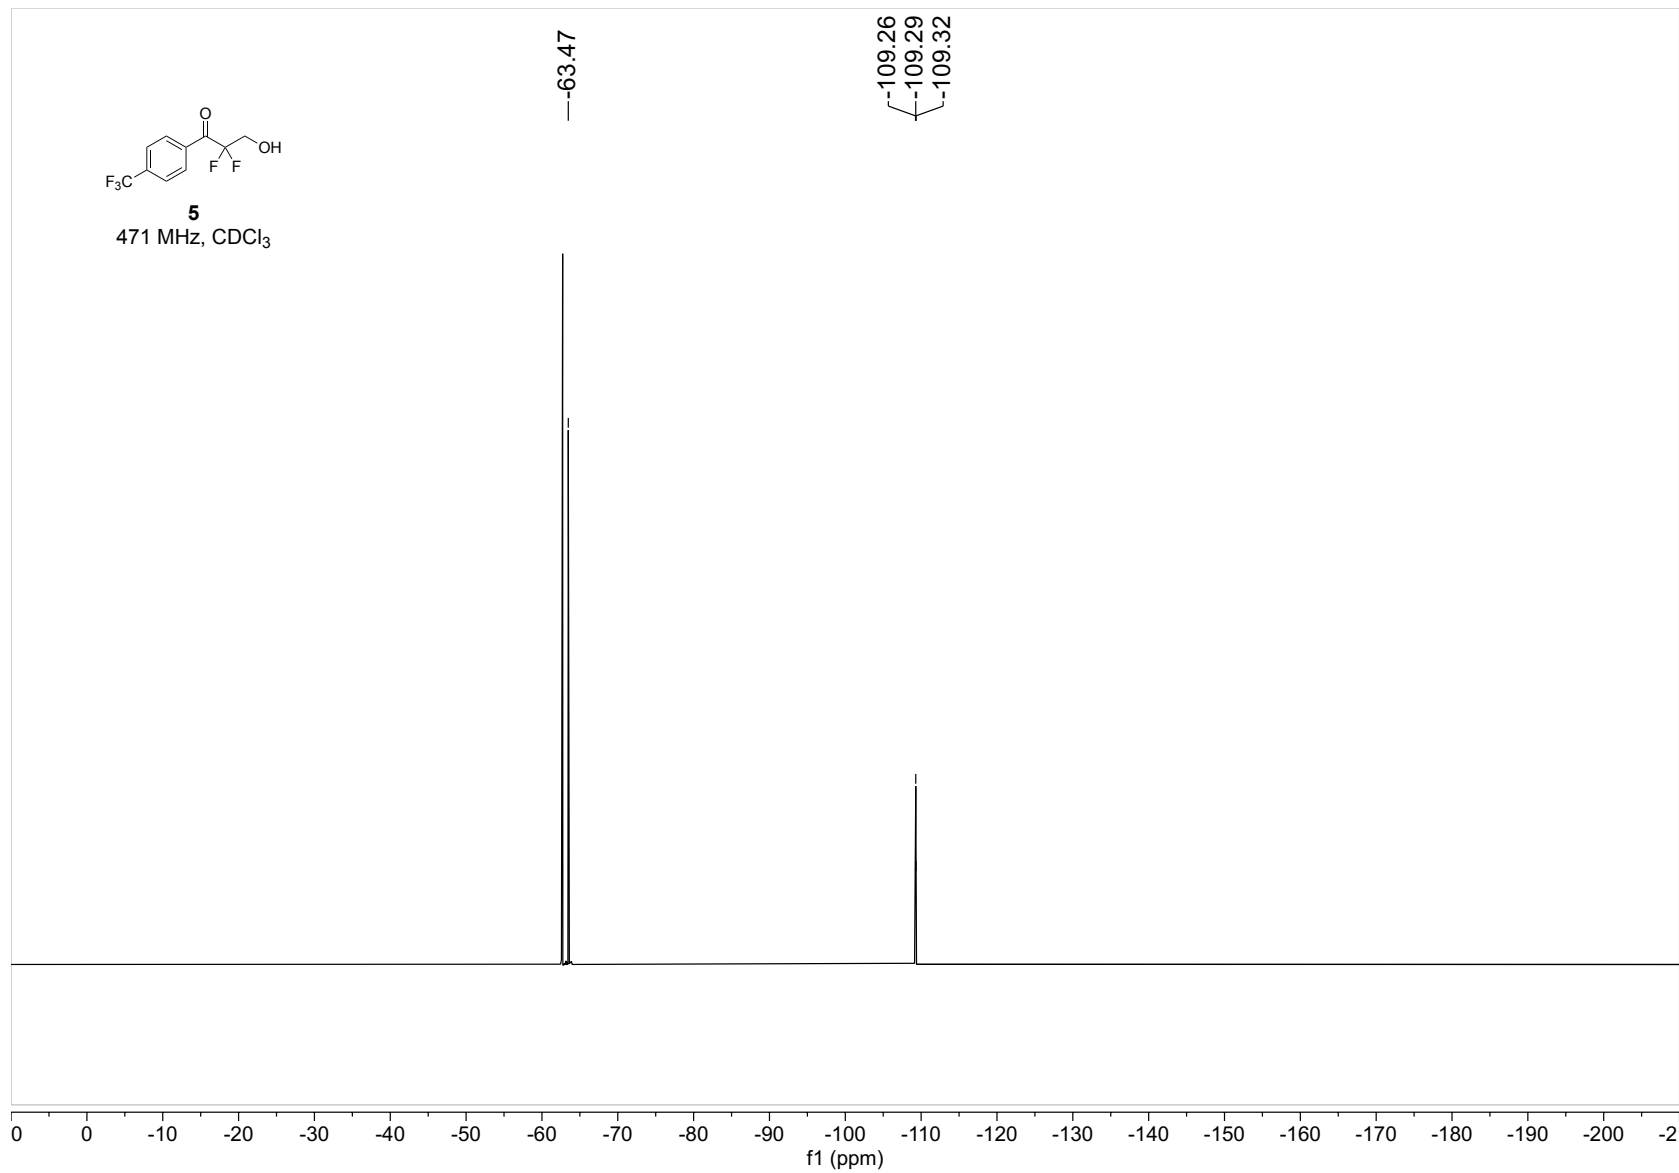

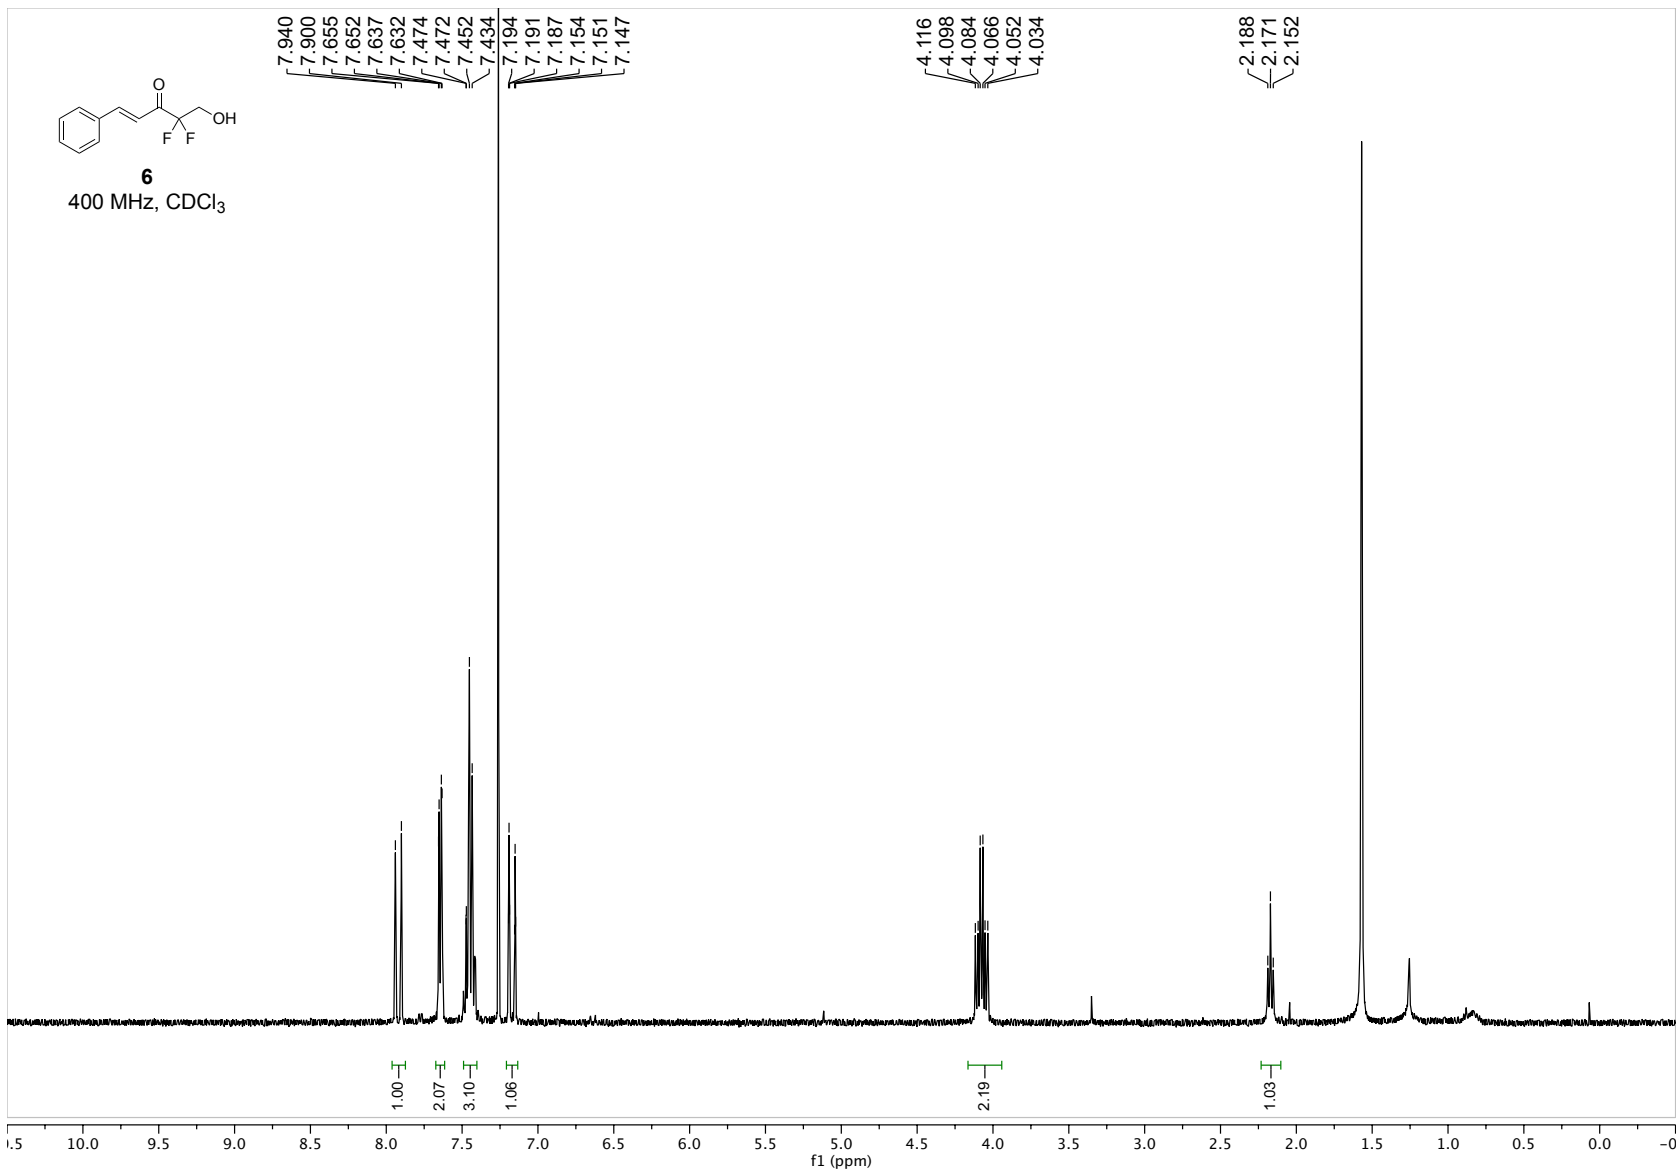

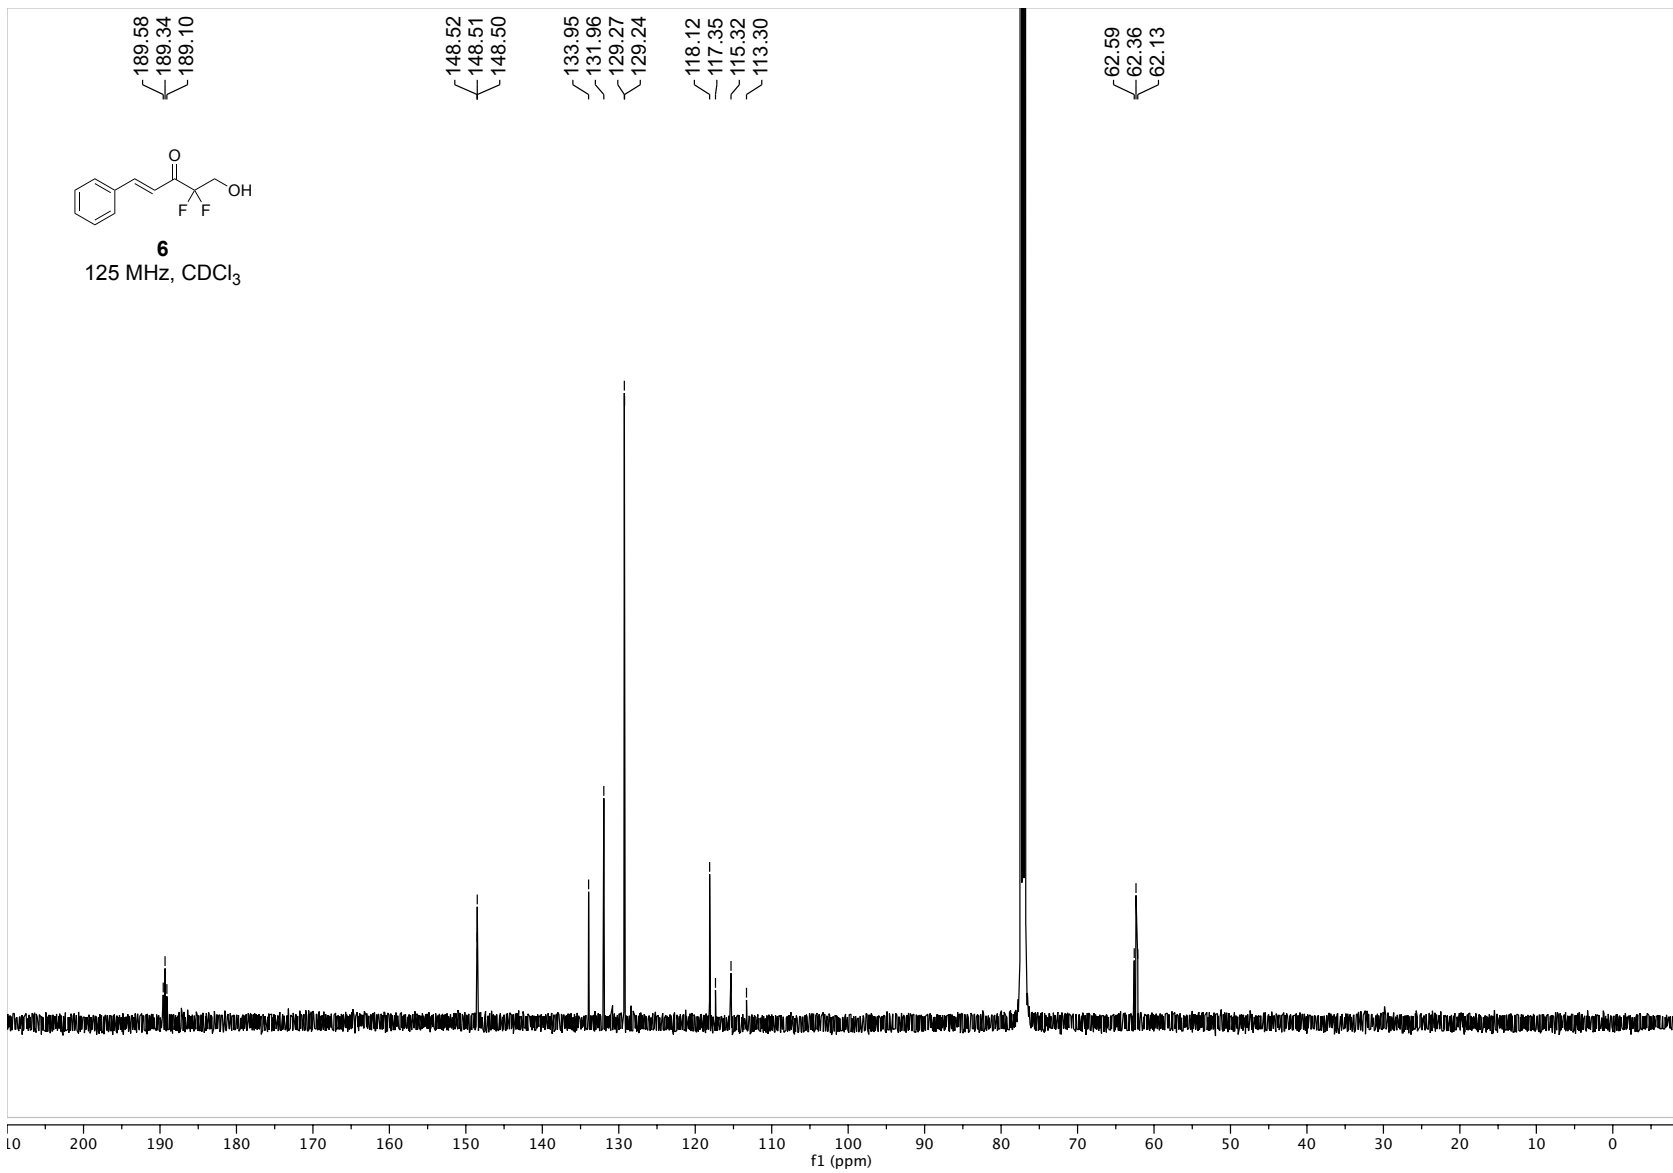

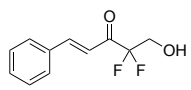

**6**  
471 MHz, CDCl<sub>3</sub>

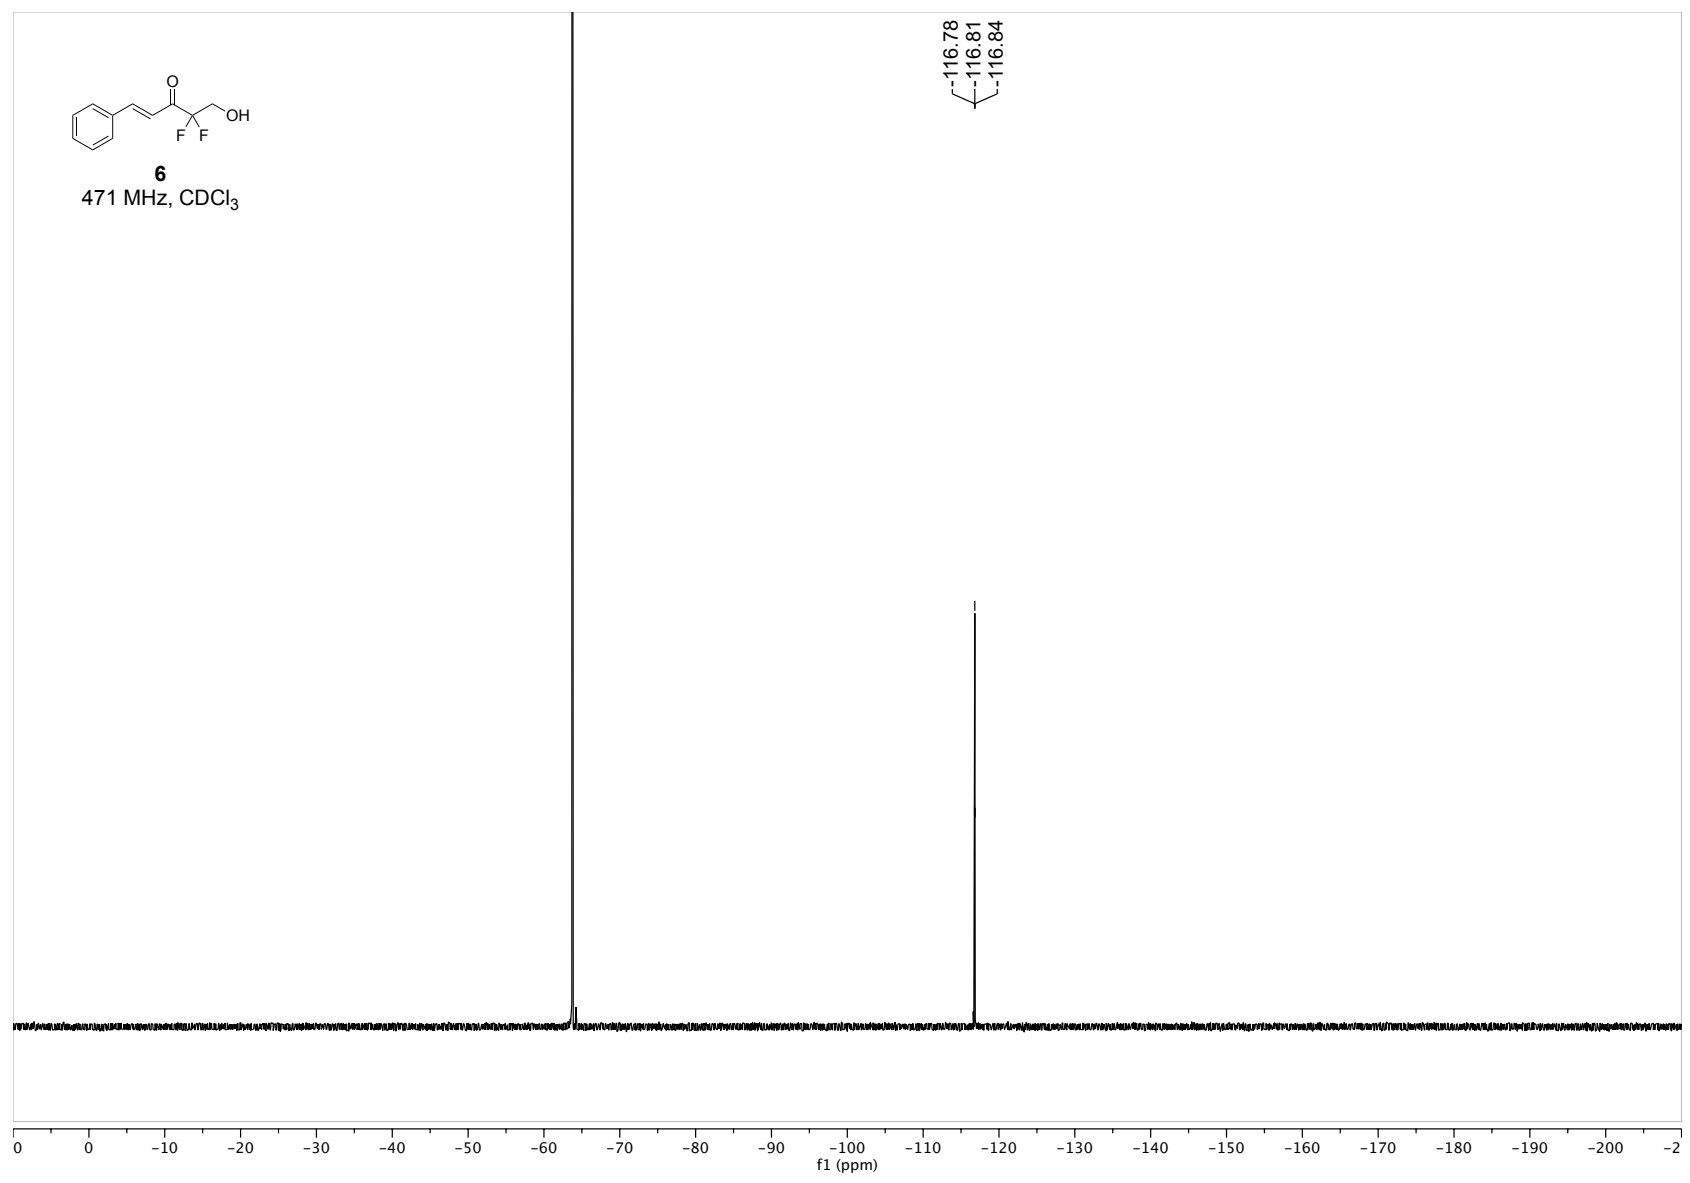

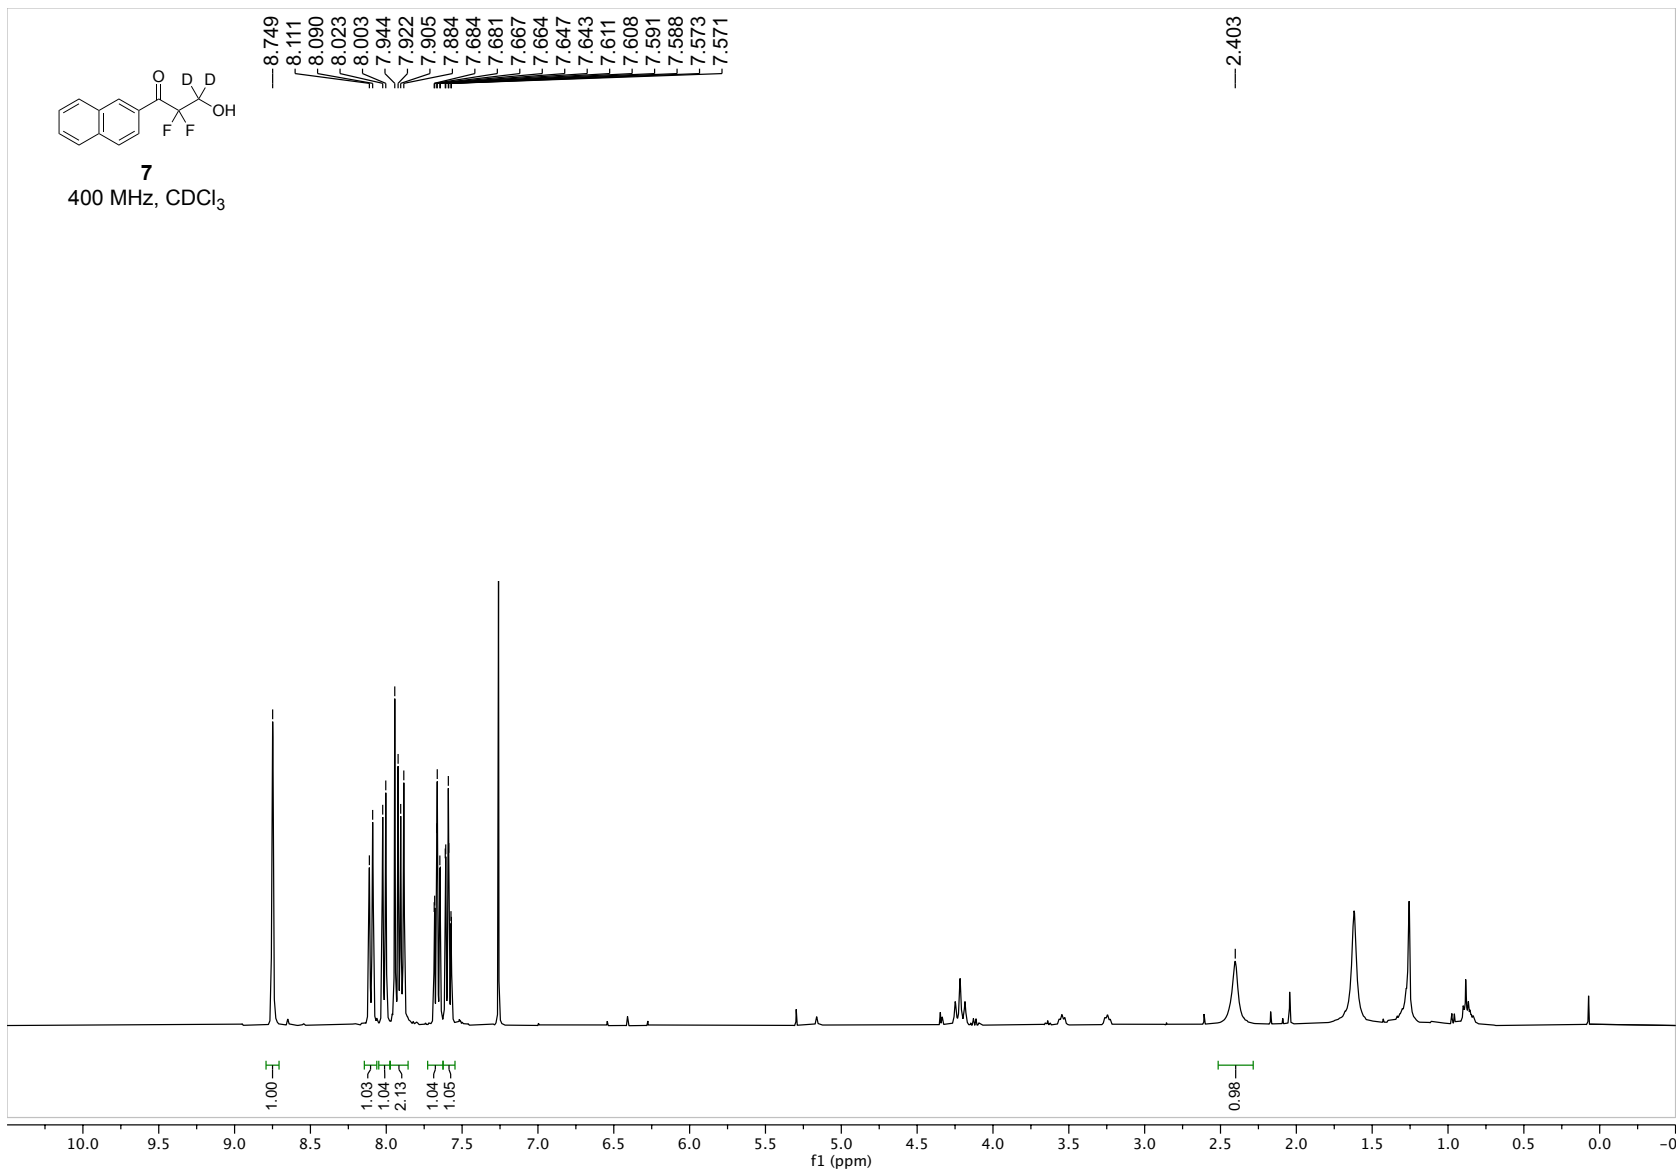



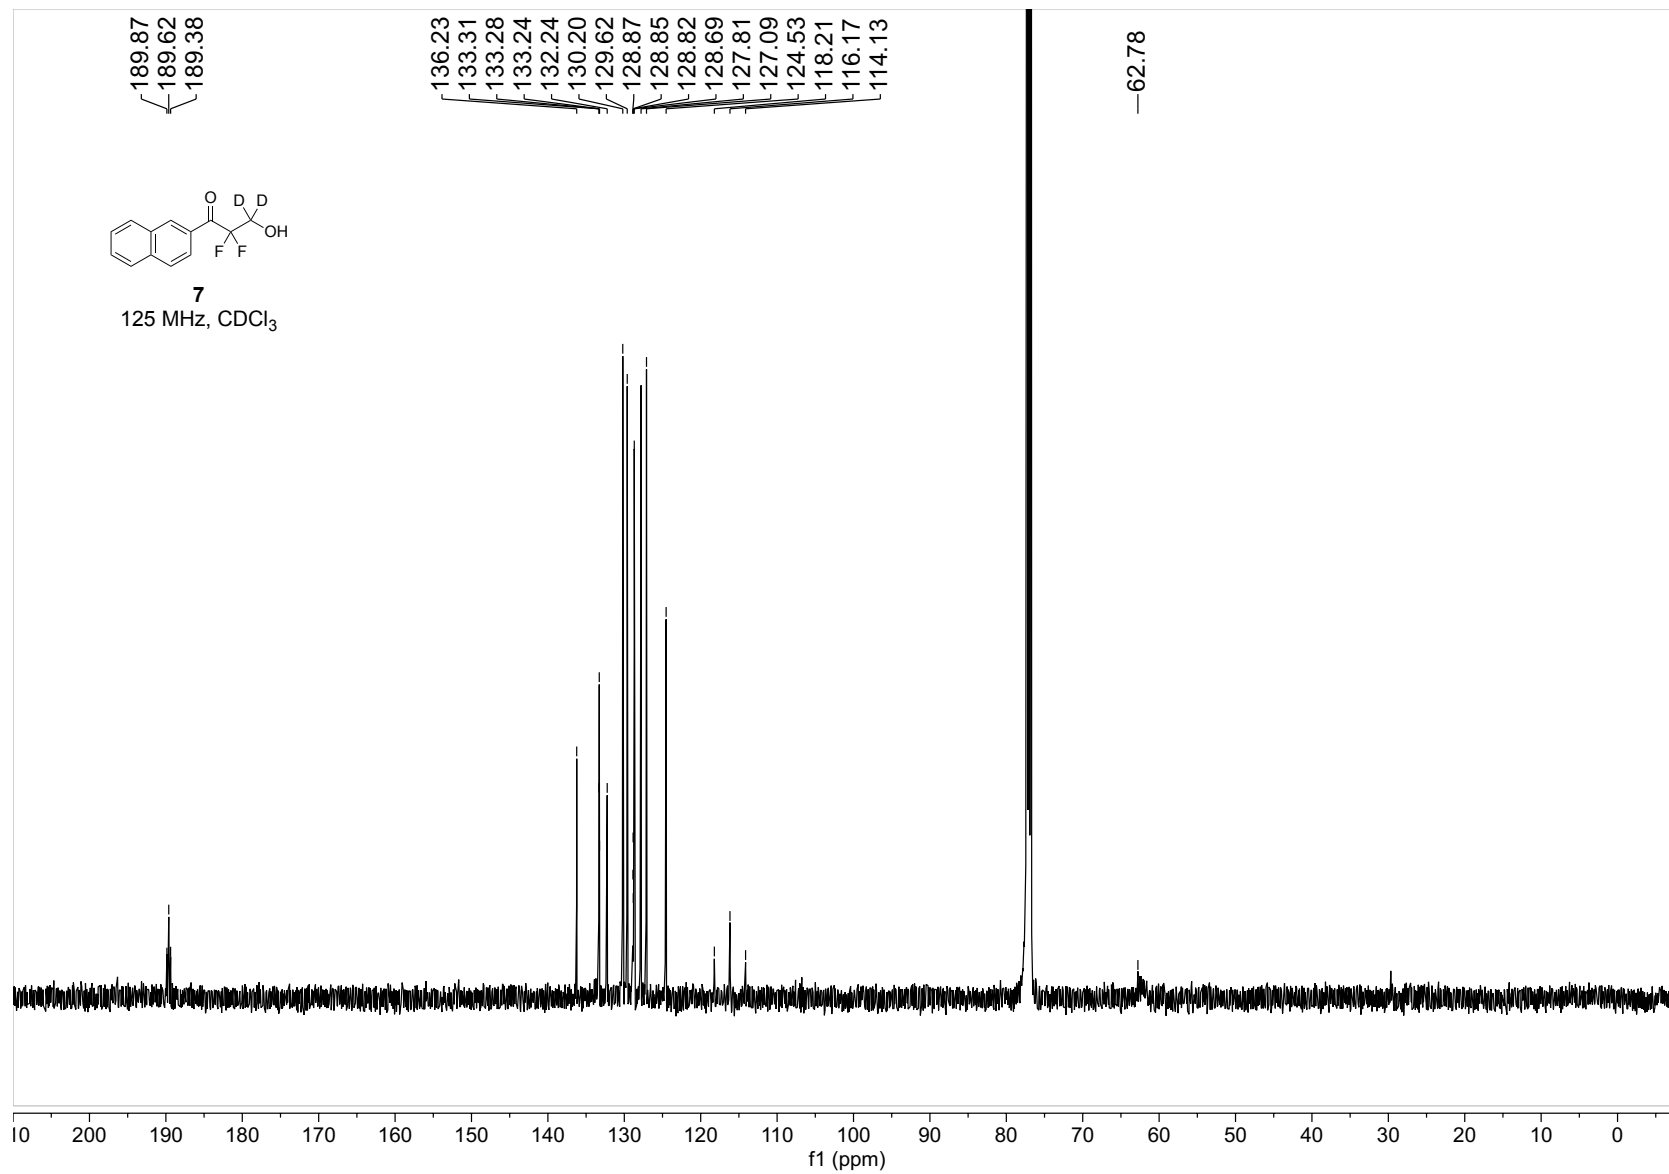

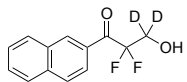

**7**  
471 MHz, CDCl<sub>3</sub>

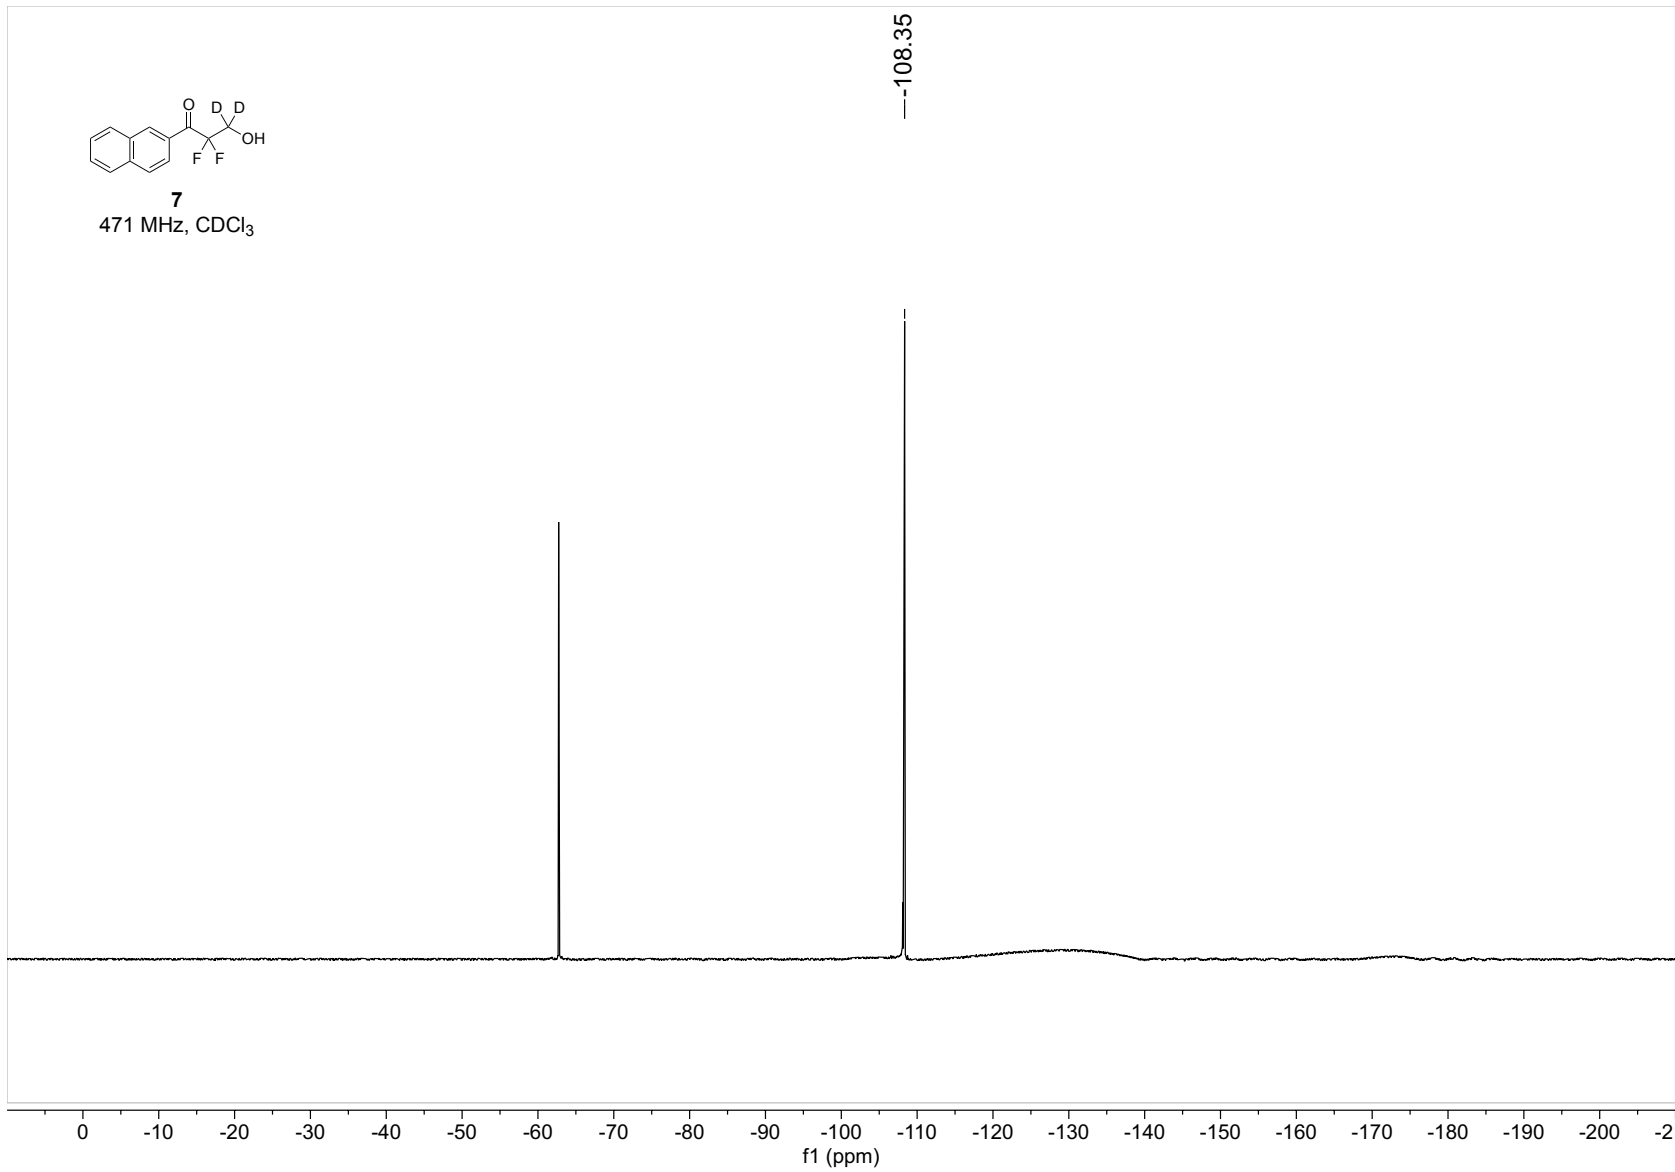

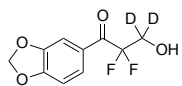

**8**  
500 MHz, CDCl<sub>3</sub>

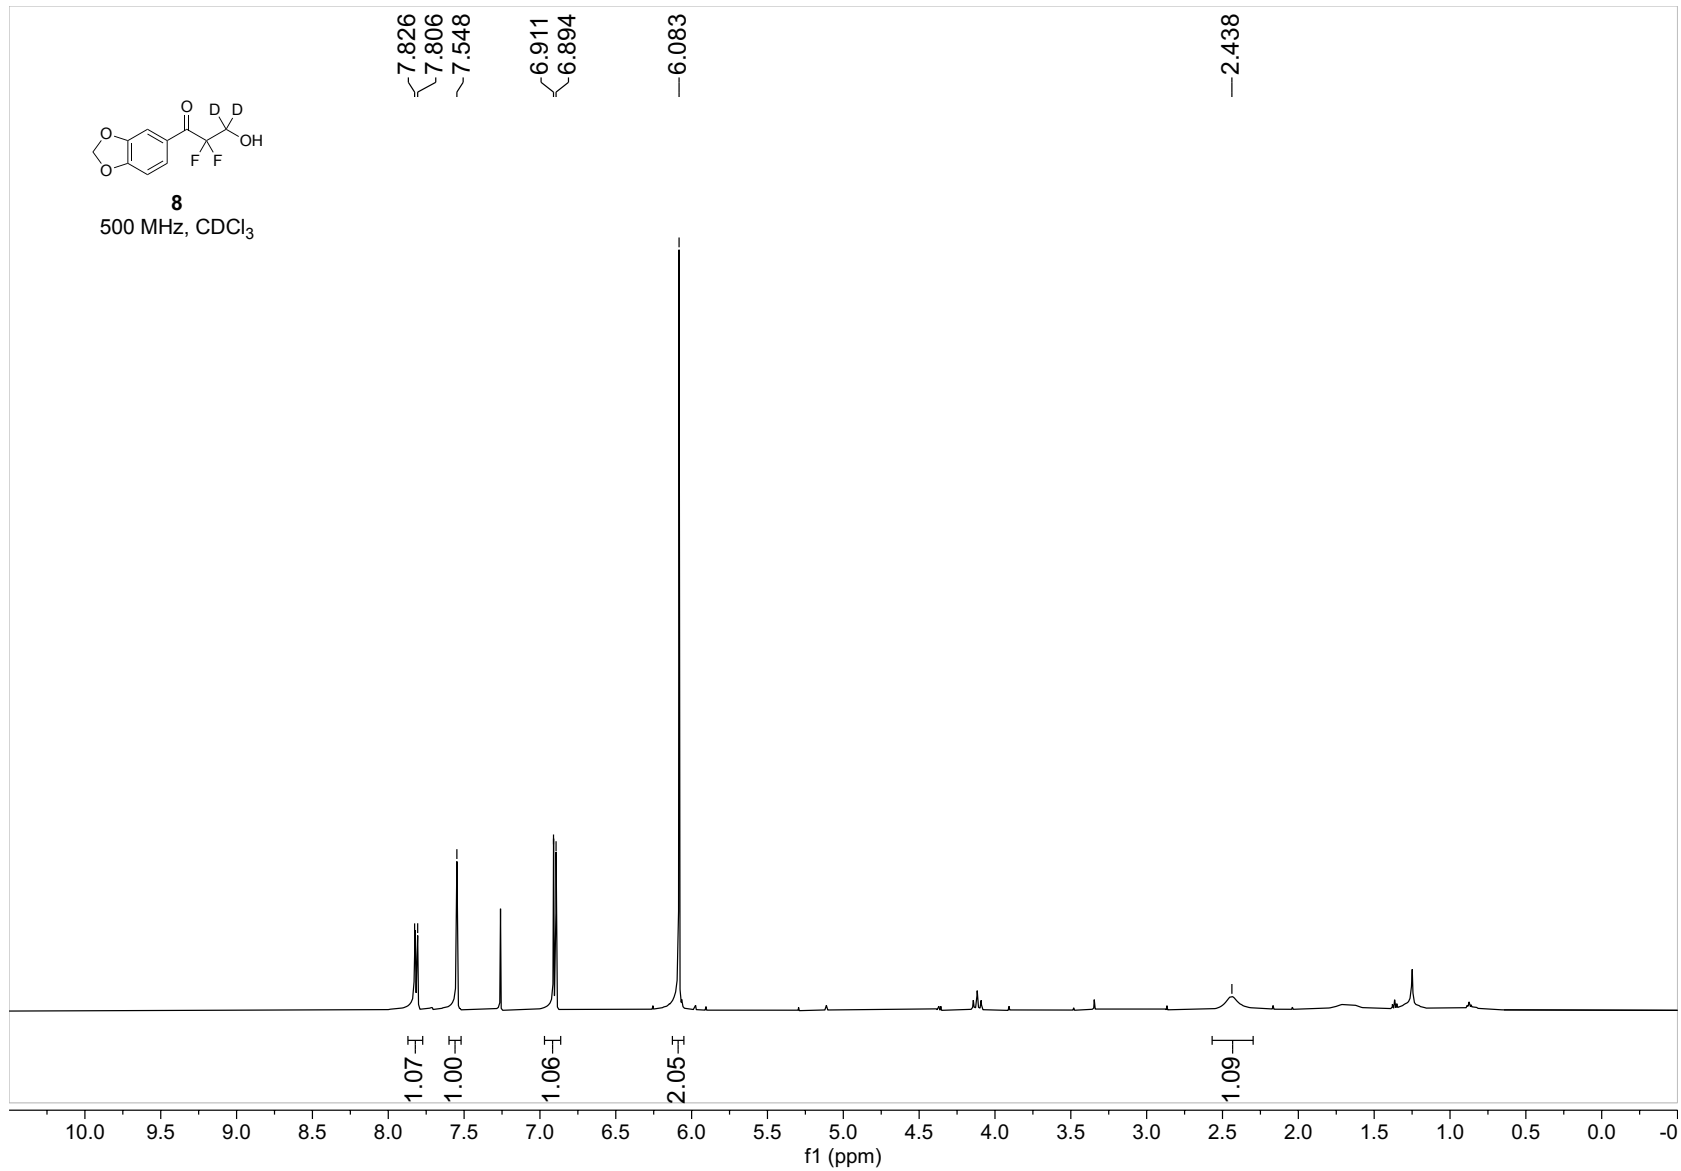

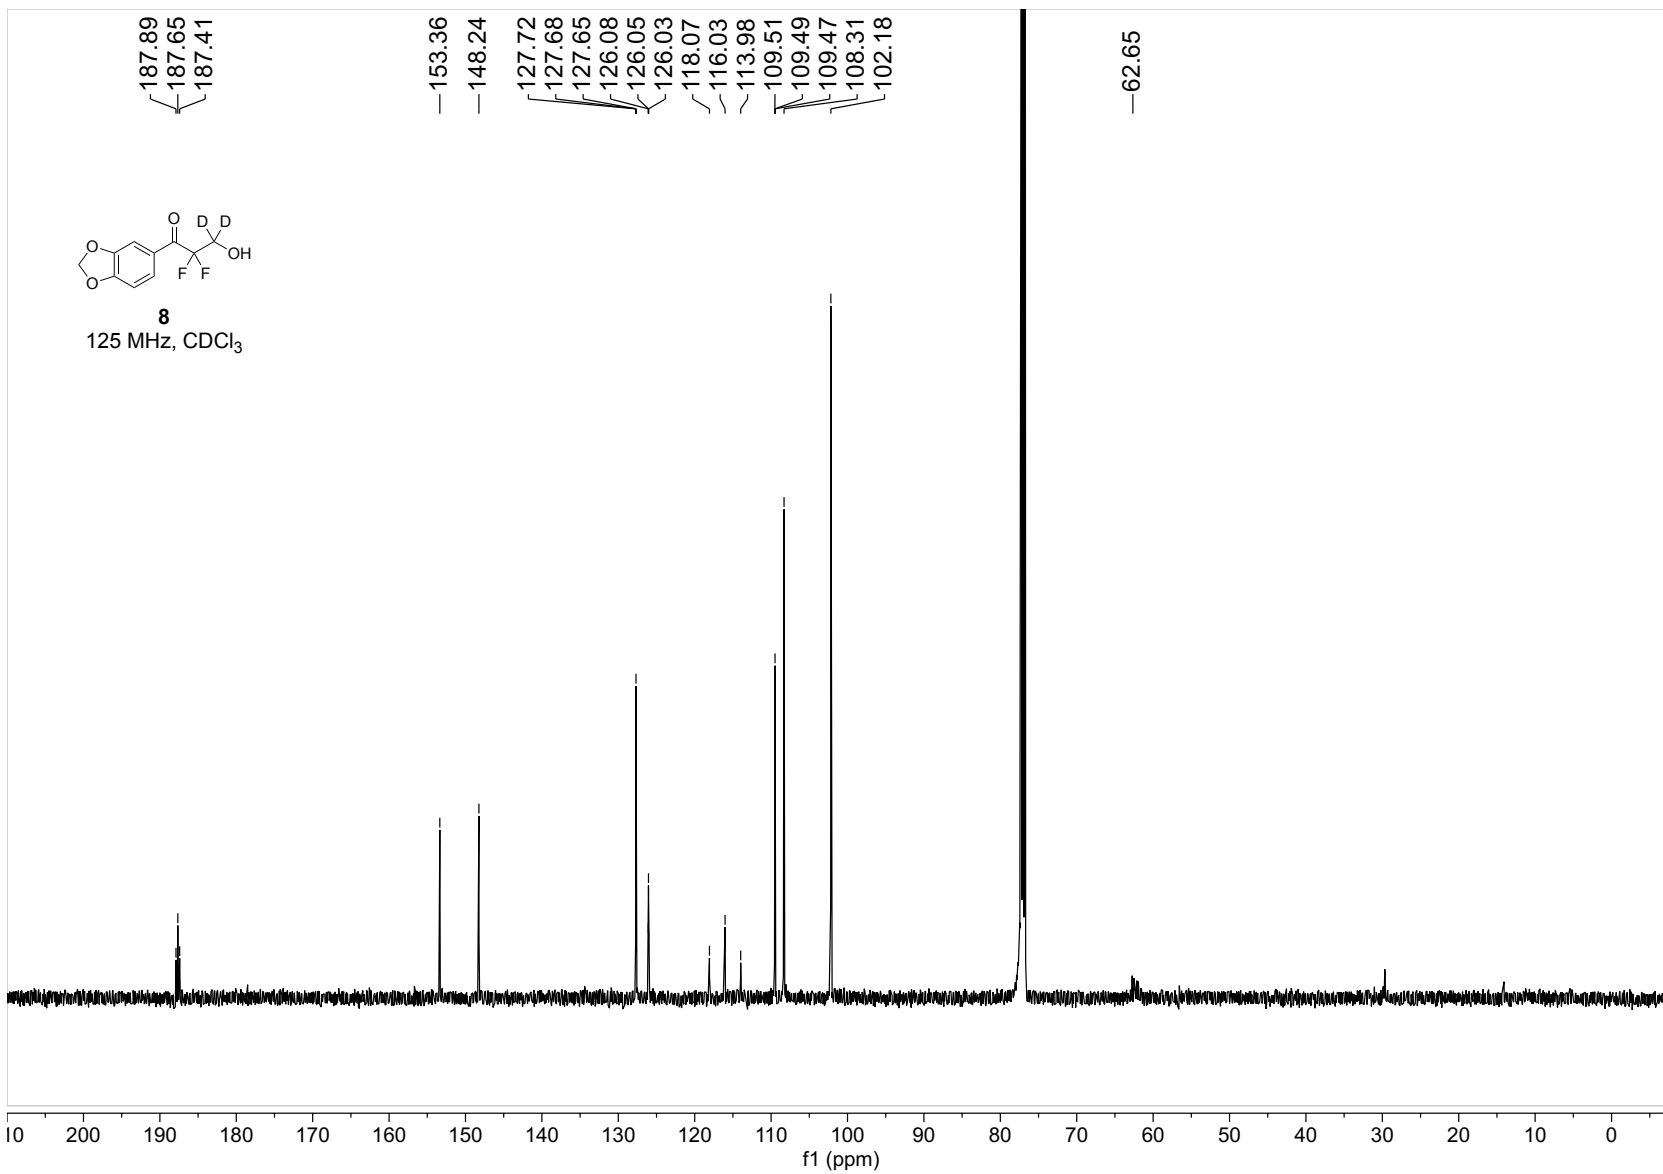

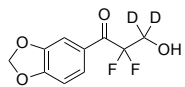

**8**

471 MHz, CDCl<sub>3</sub>

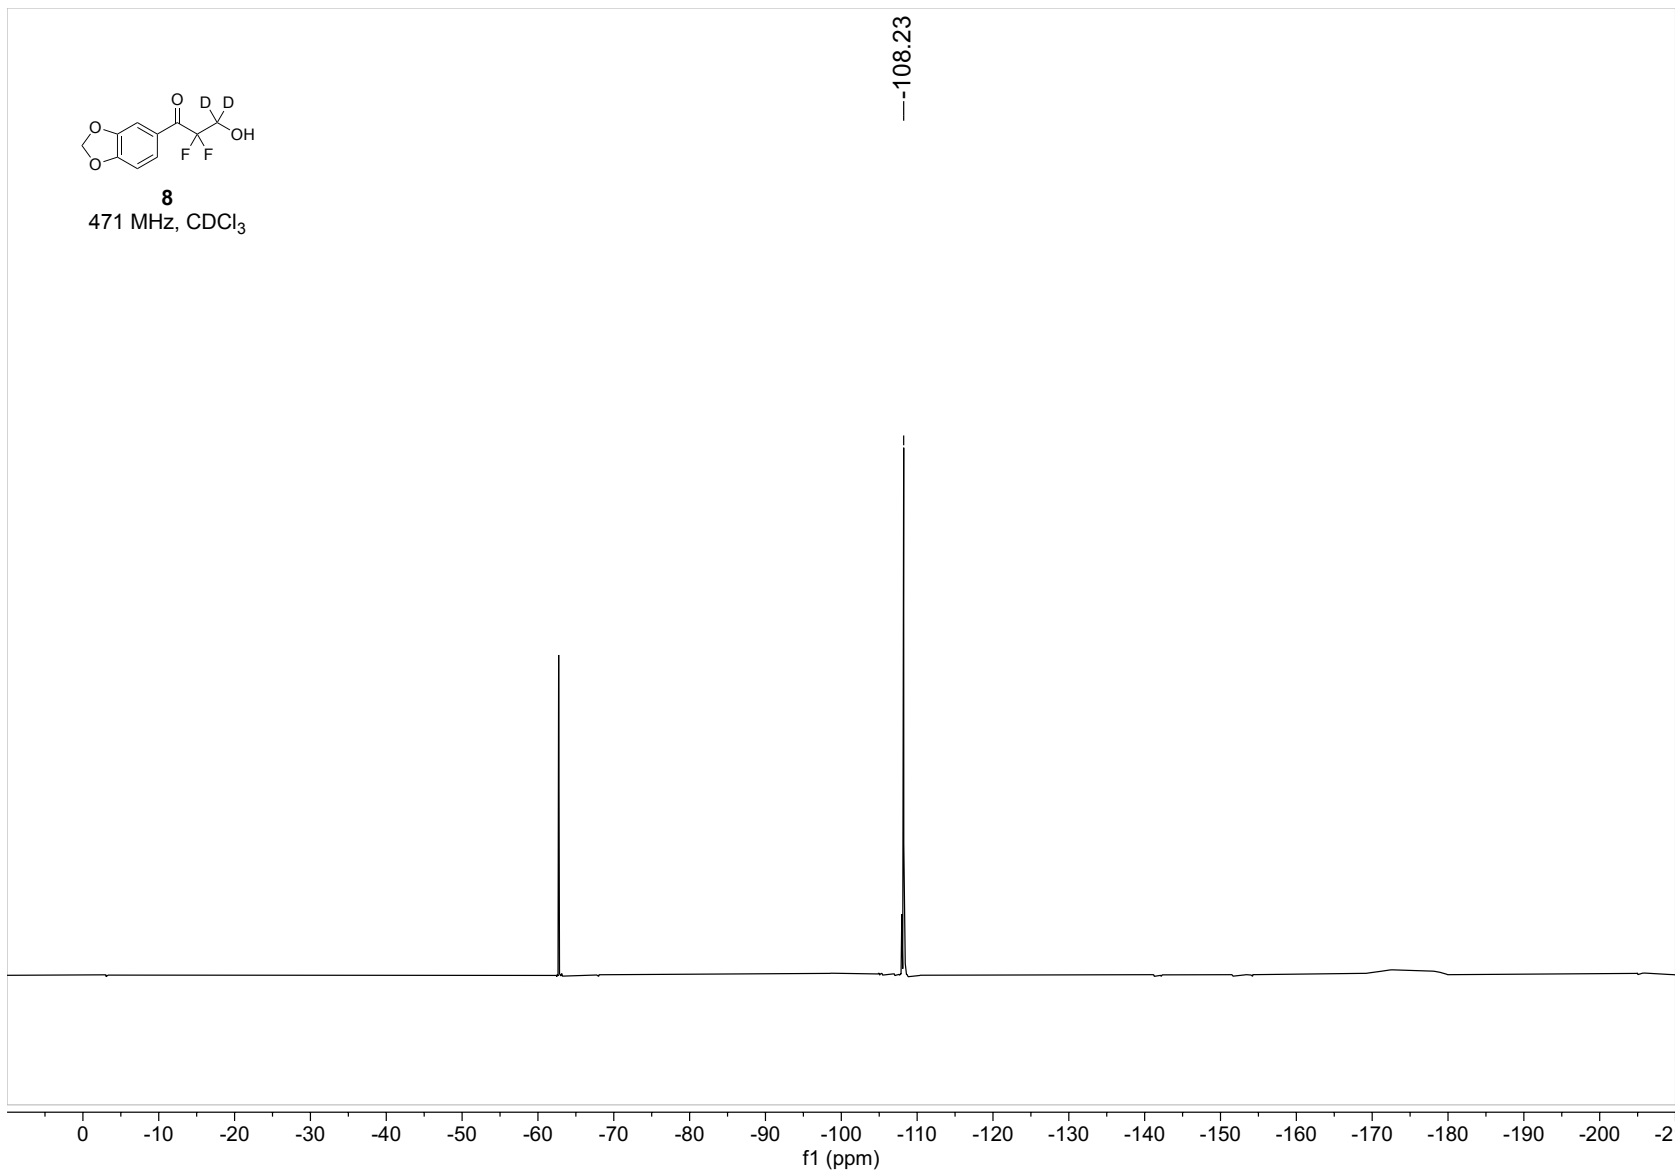

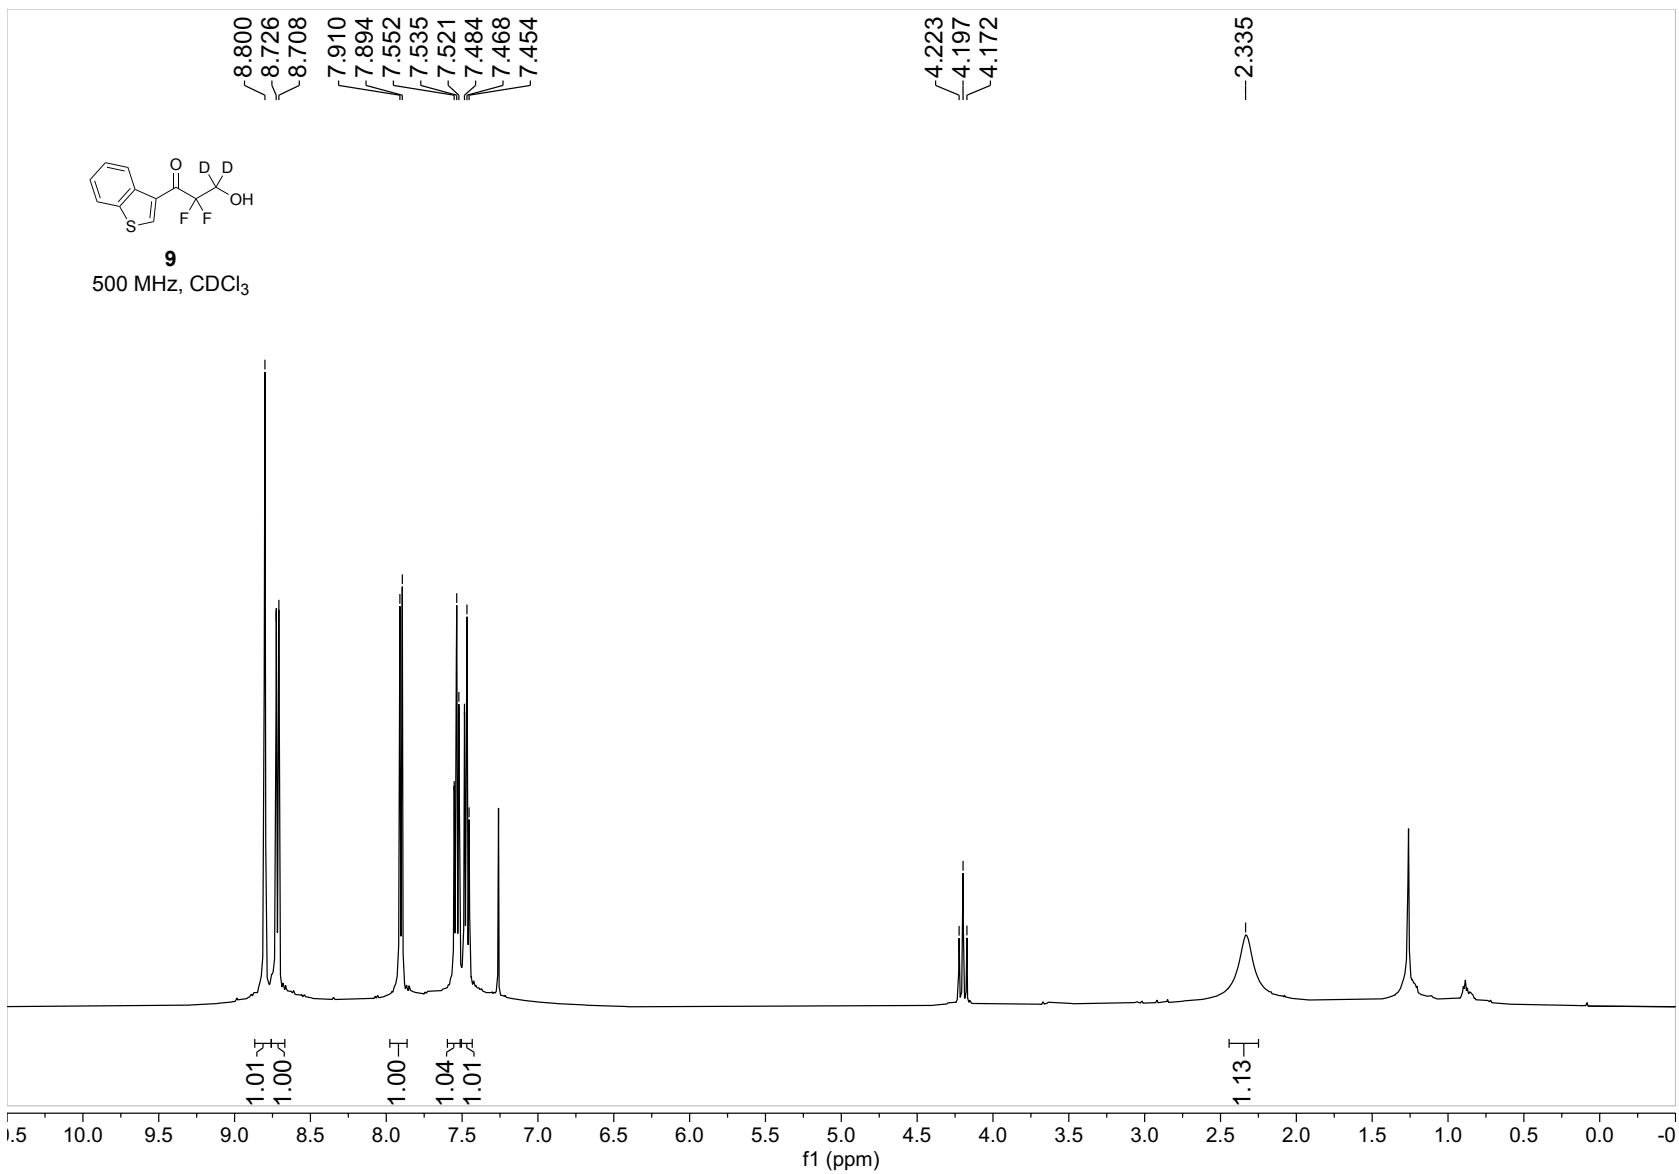

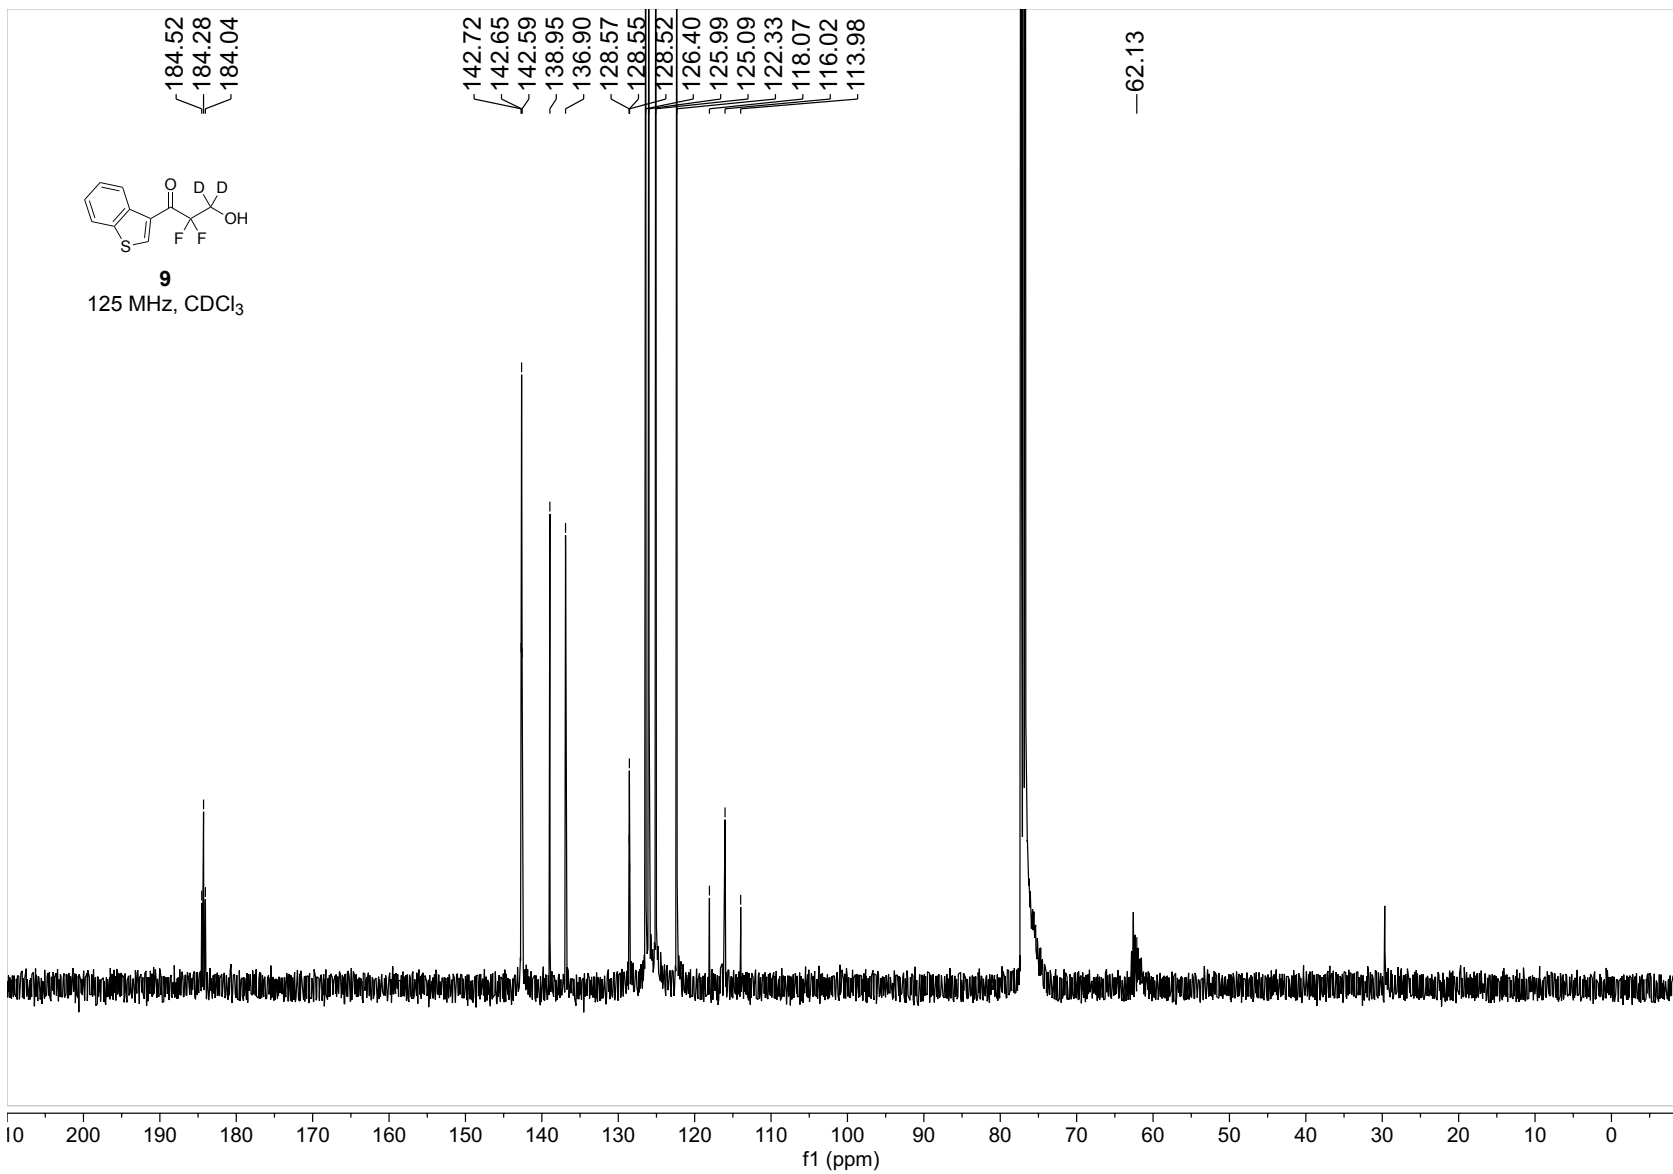

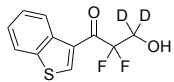

**9**  
471 MHz, CDCl<sub>3</sub>

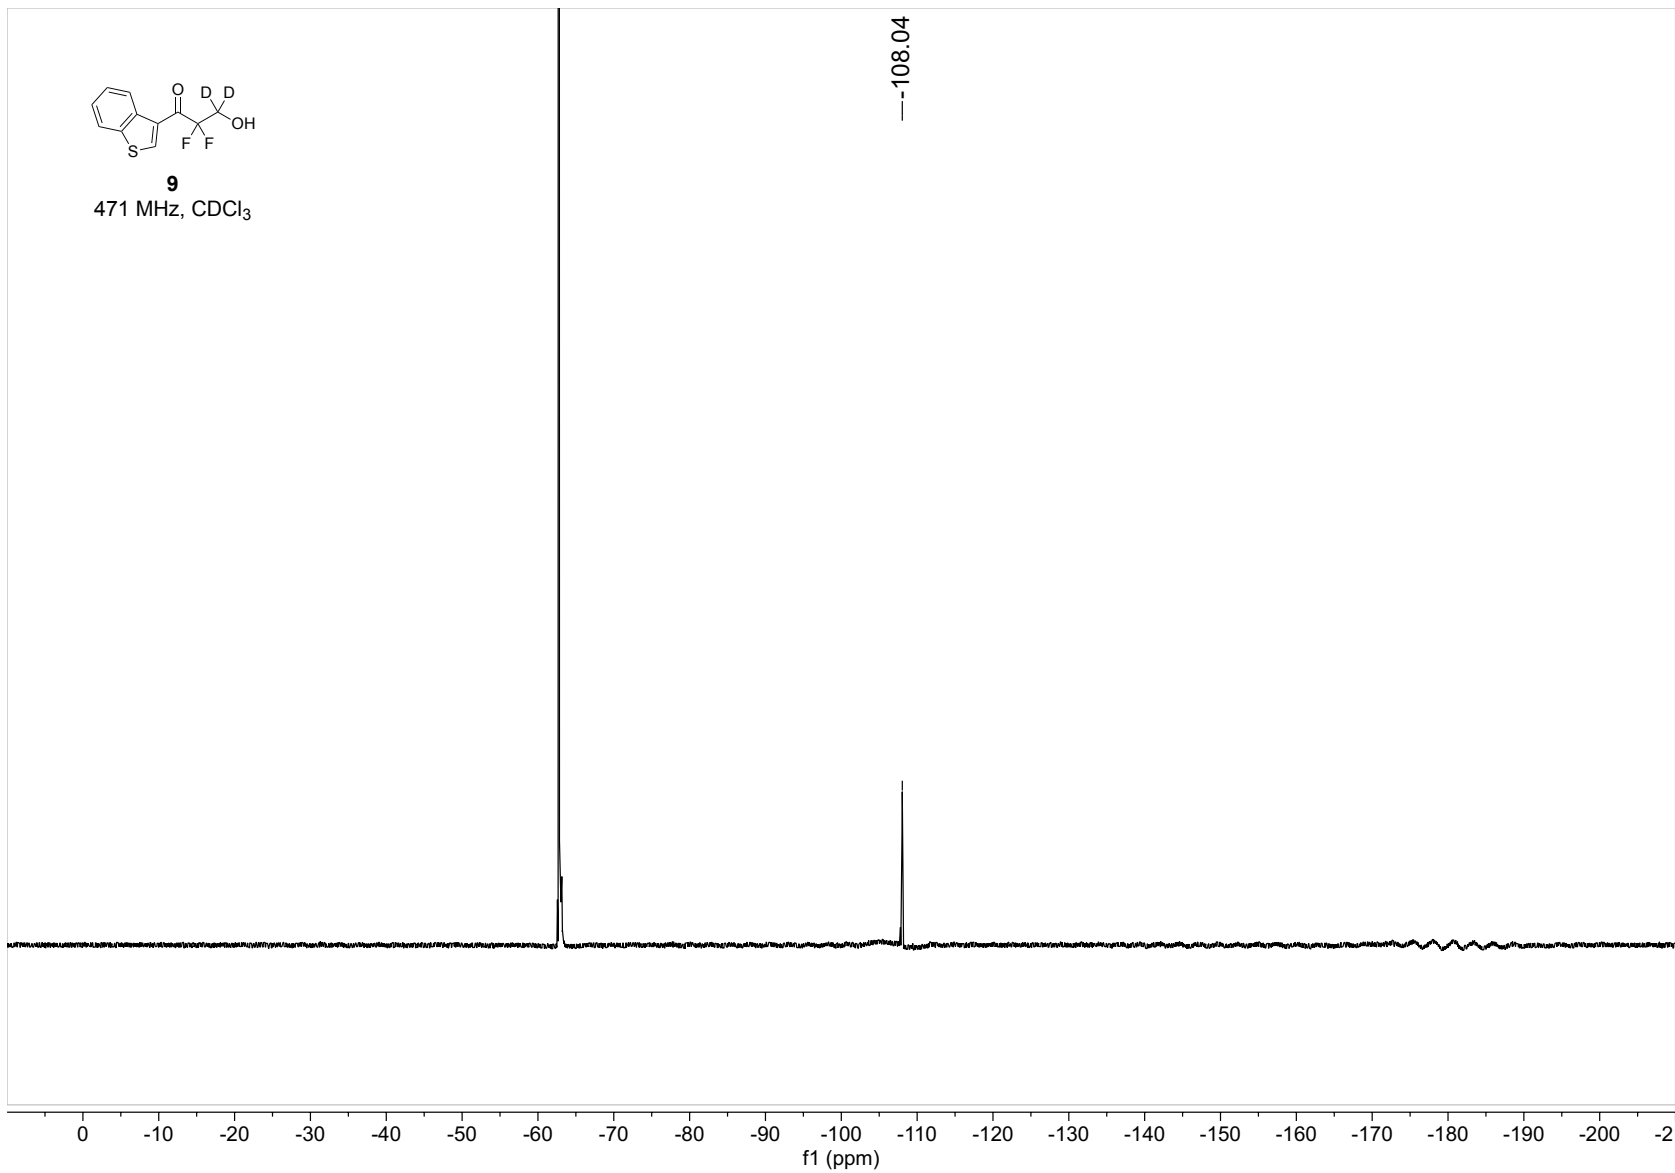



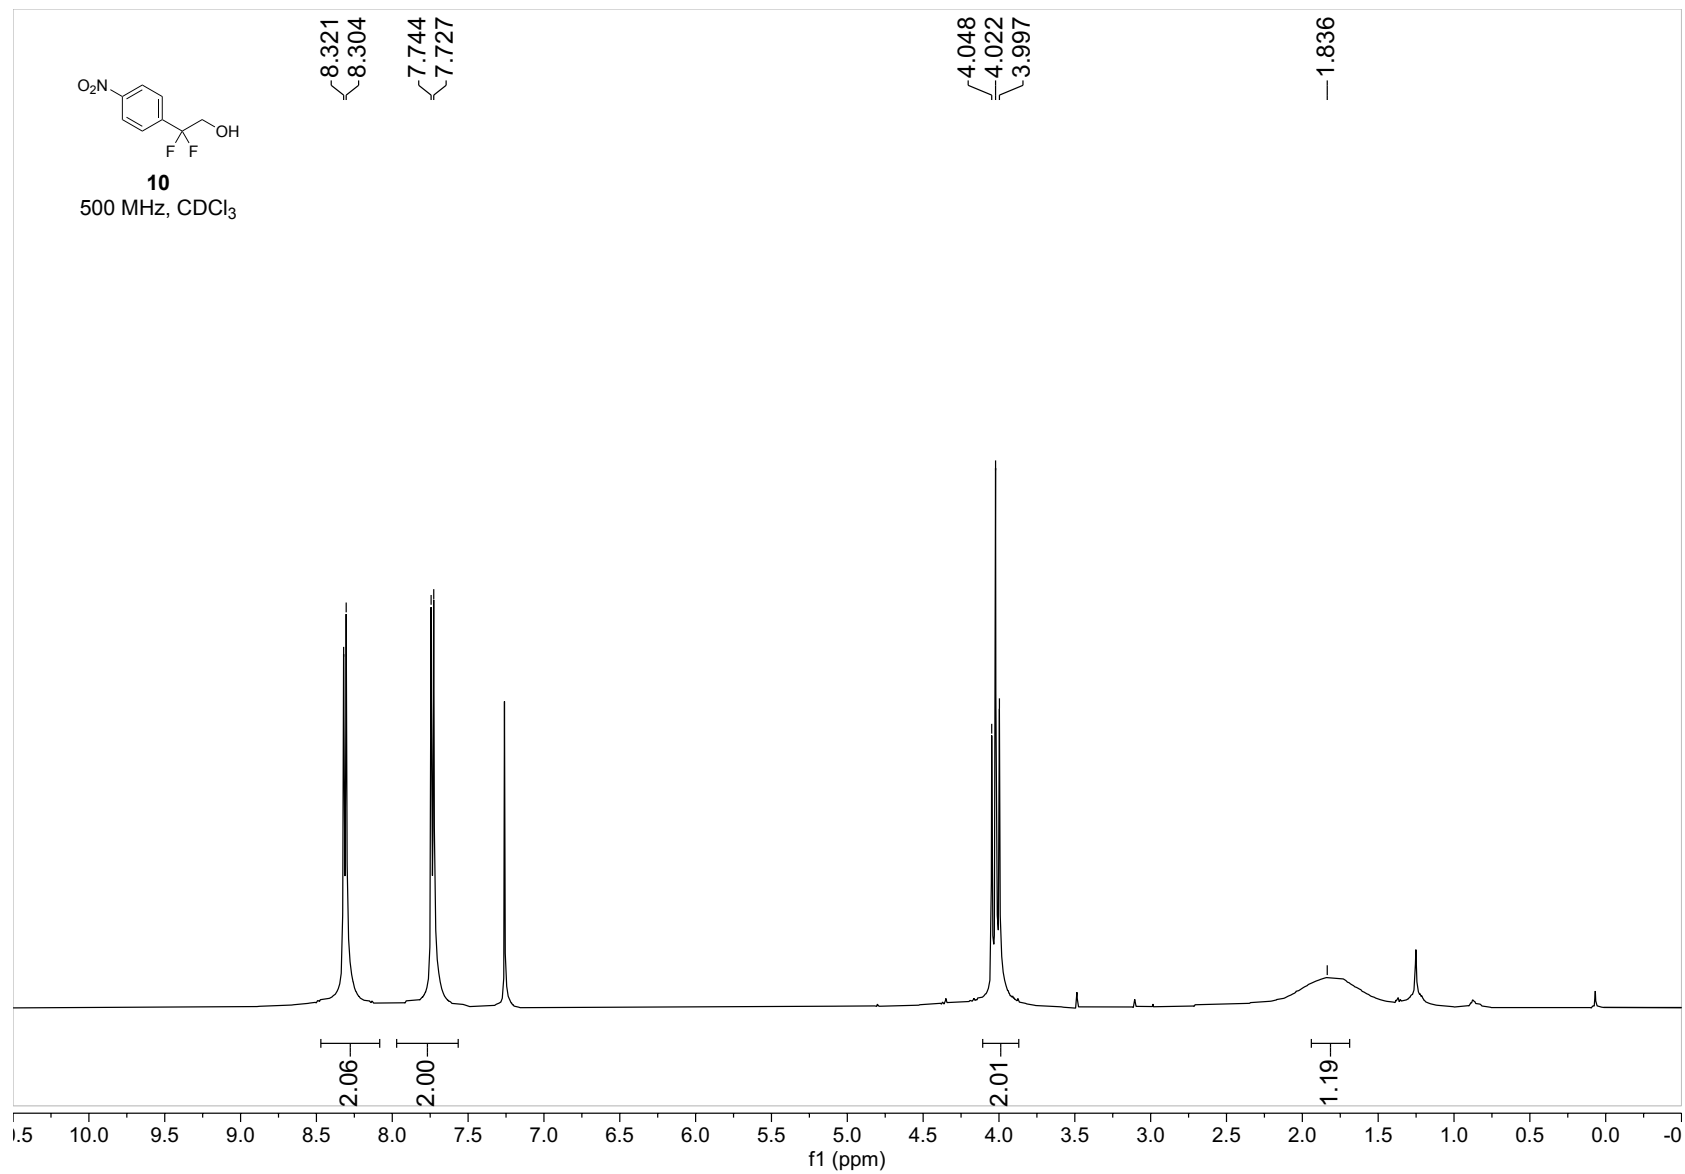

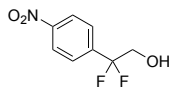

**10**

125 MHz, CDCl<sub>3</sub>

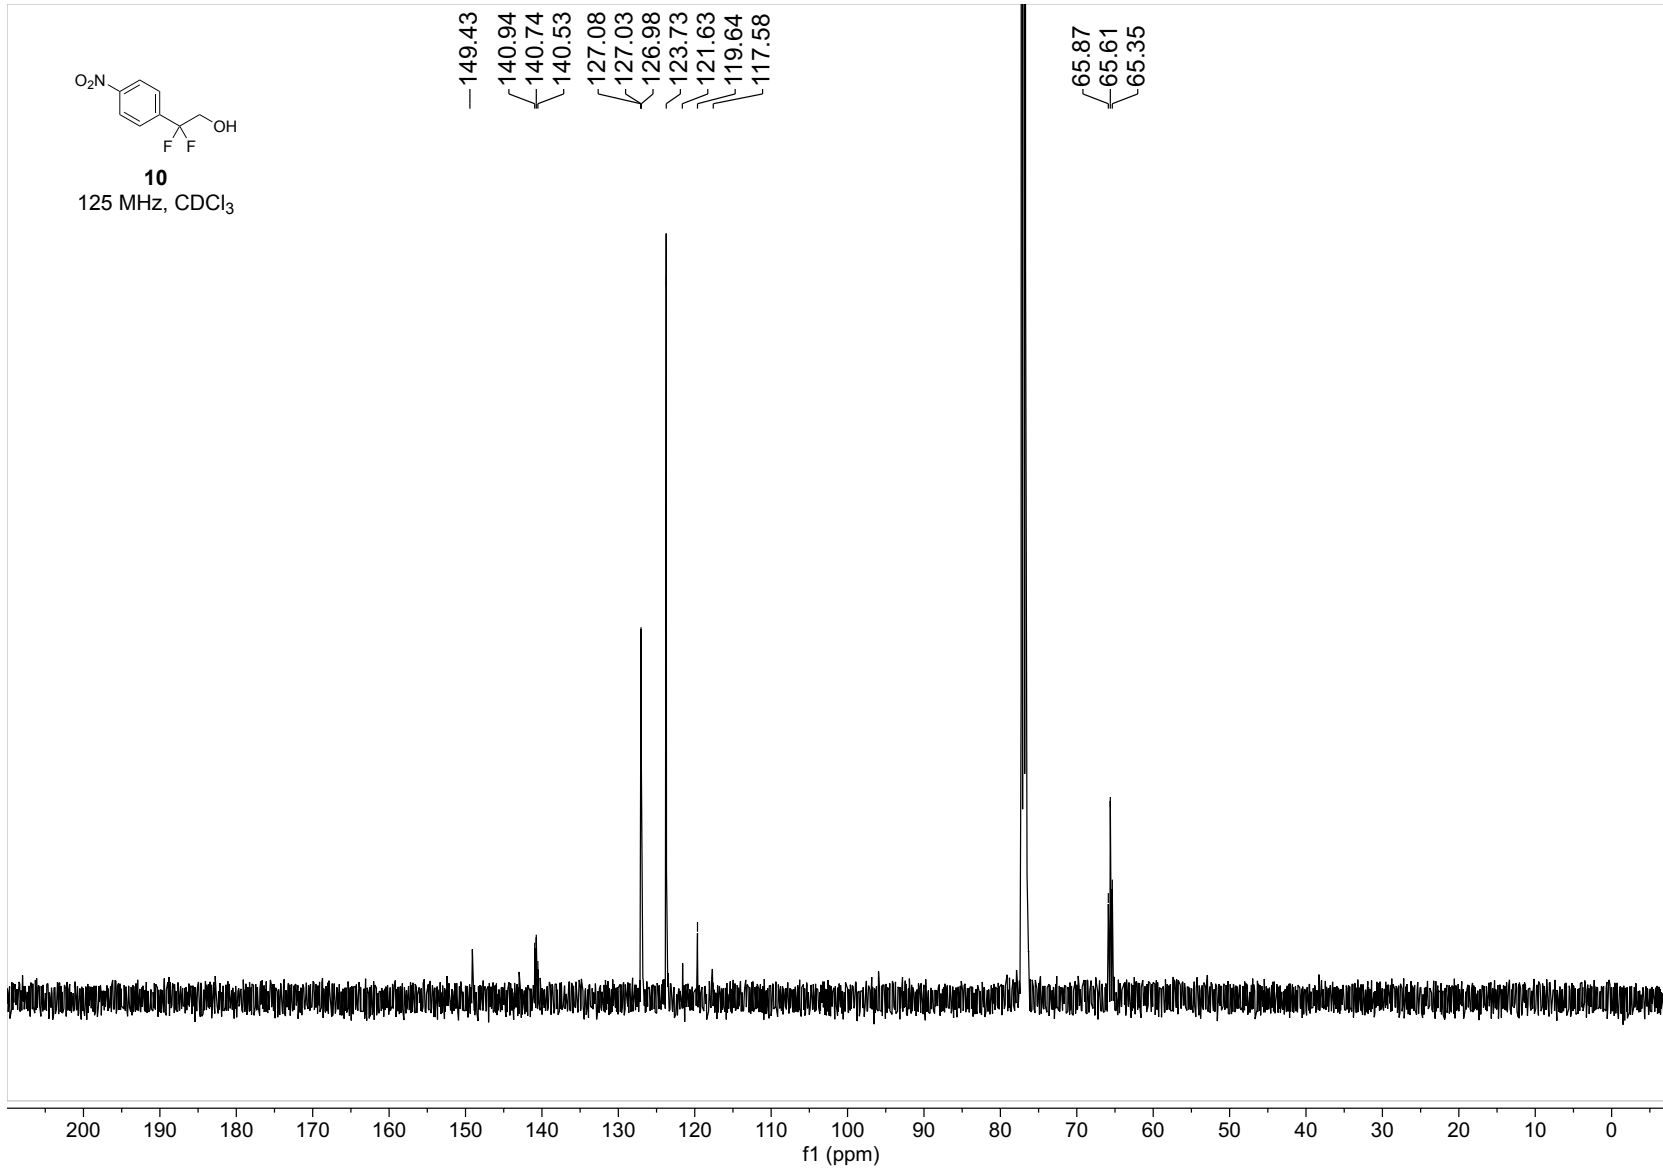

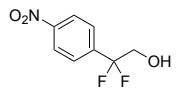

**10**  
376 MHz, CDCl<sub>3</sub>

107.068  
107.102  
107.136

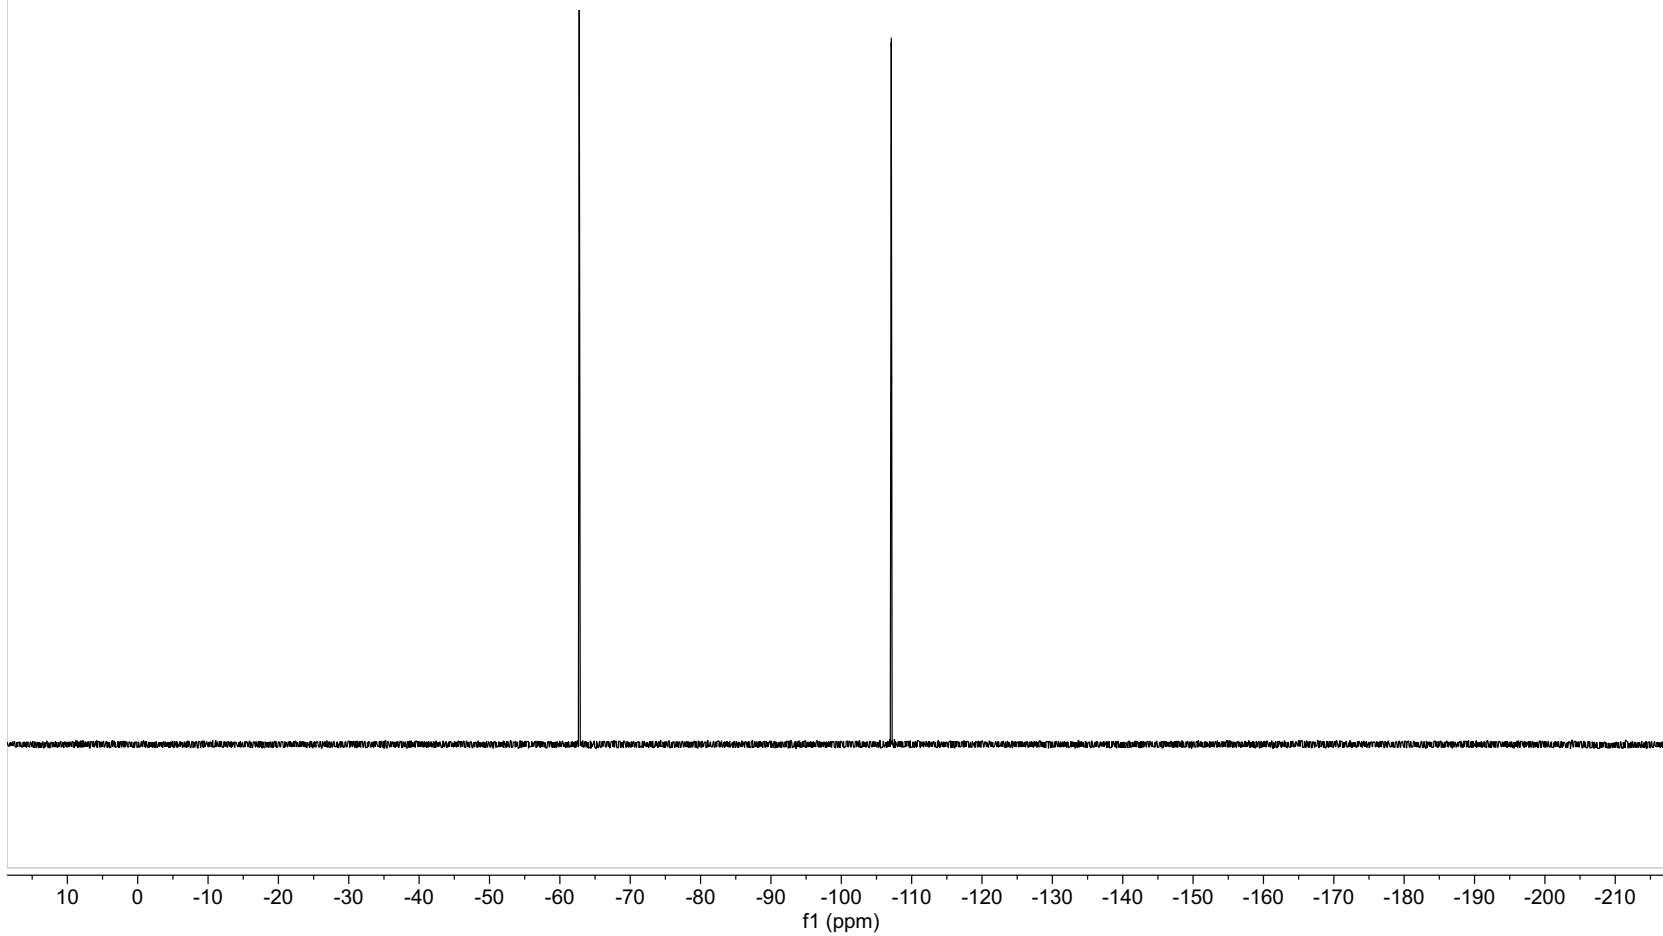

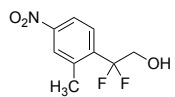

**11**  
500 MHz, CDCl<sub>3</sub>

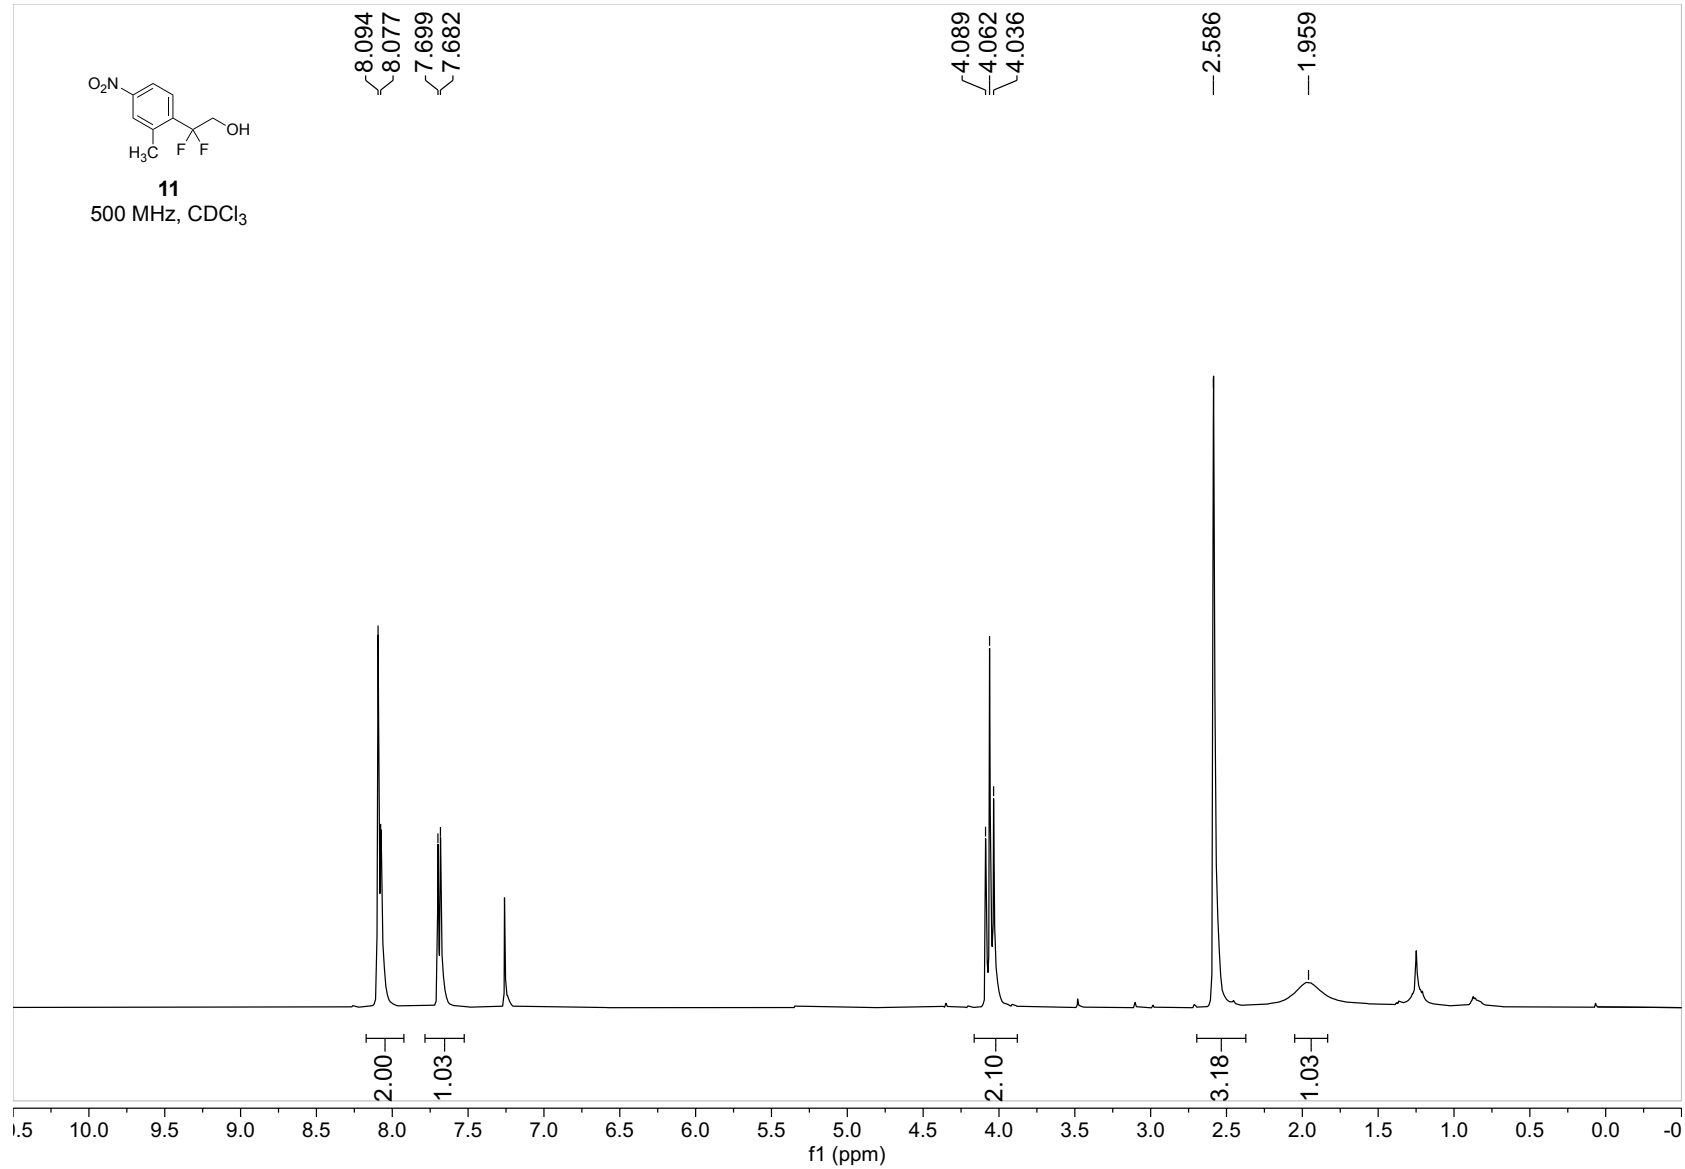

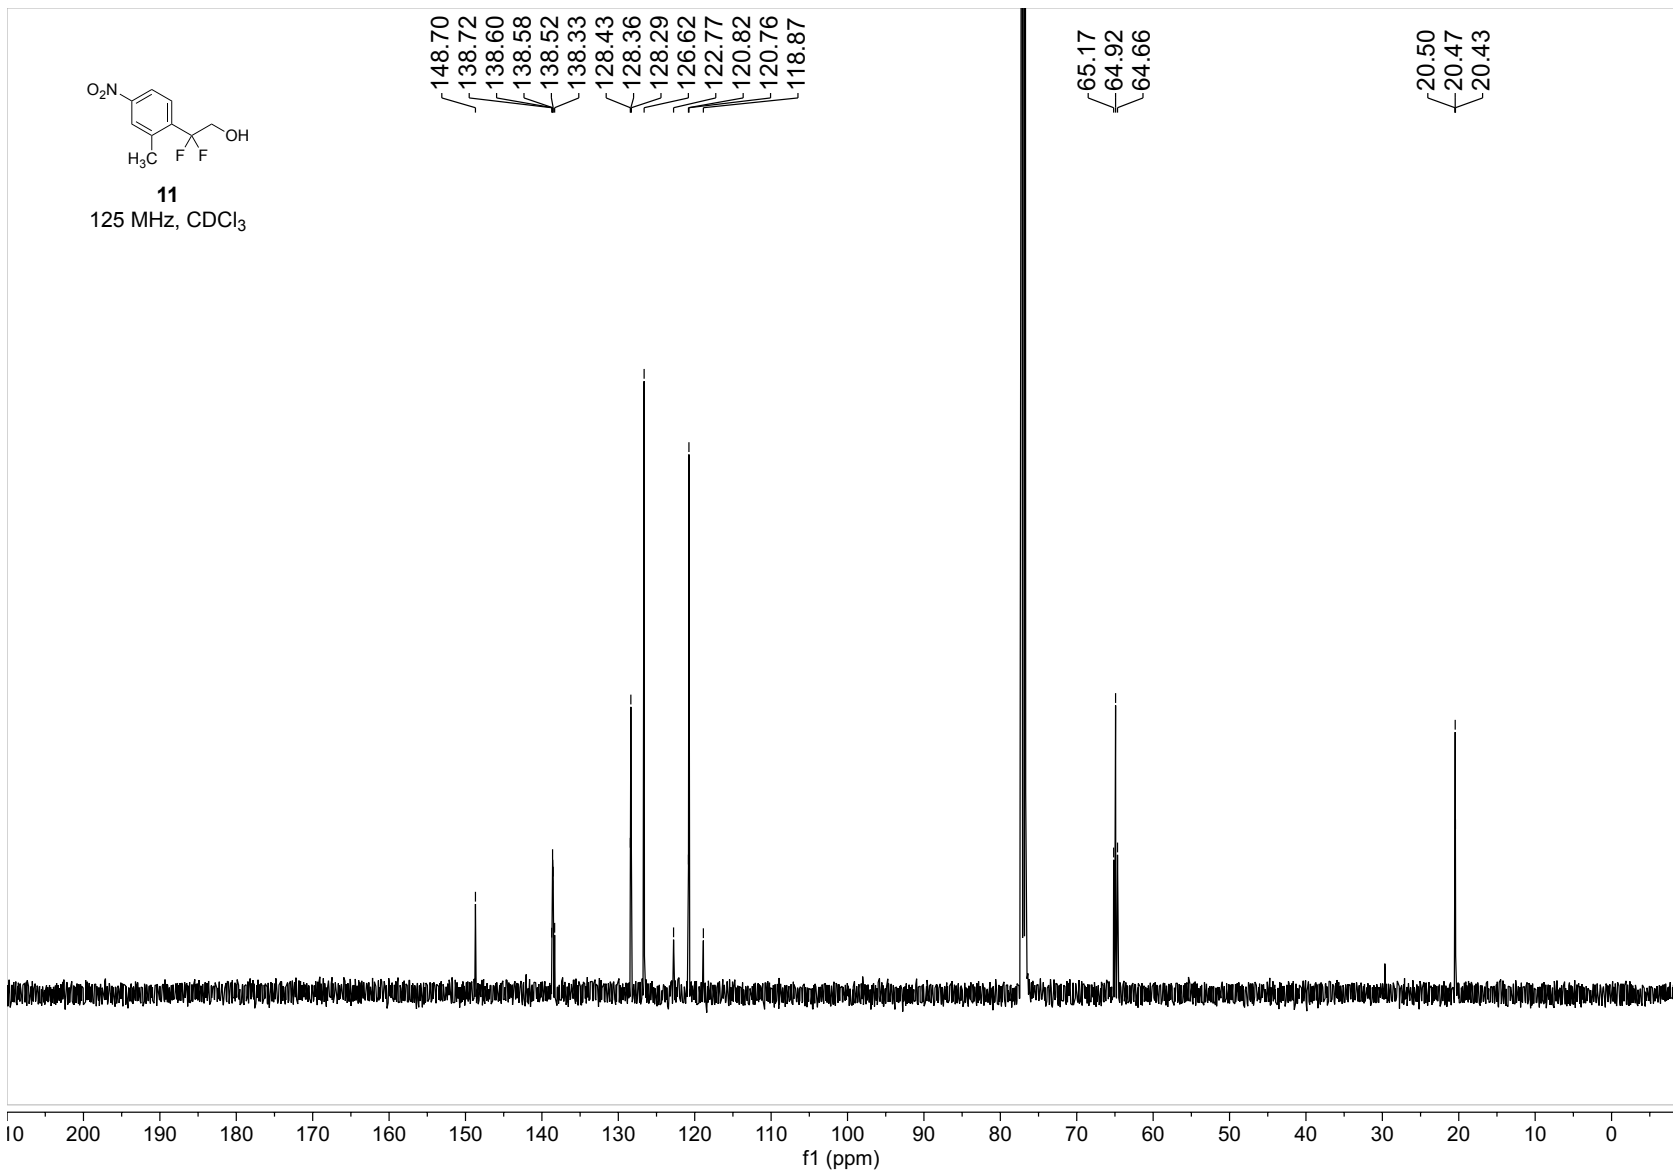

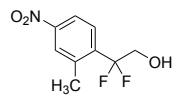

**11**  
471 MHz, CDCl<sub>3</sub>

-105.010  
-105.039  
-105.067

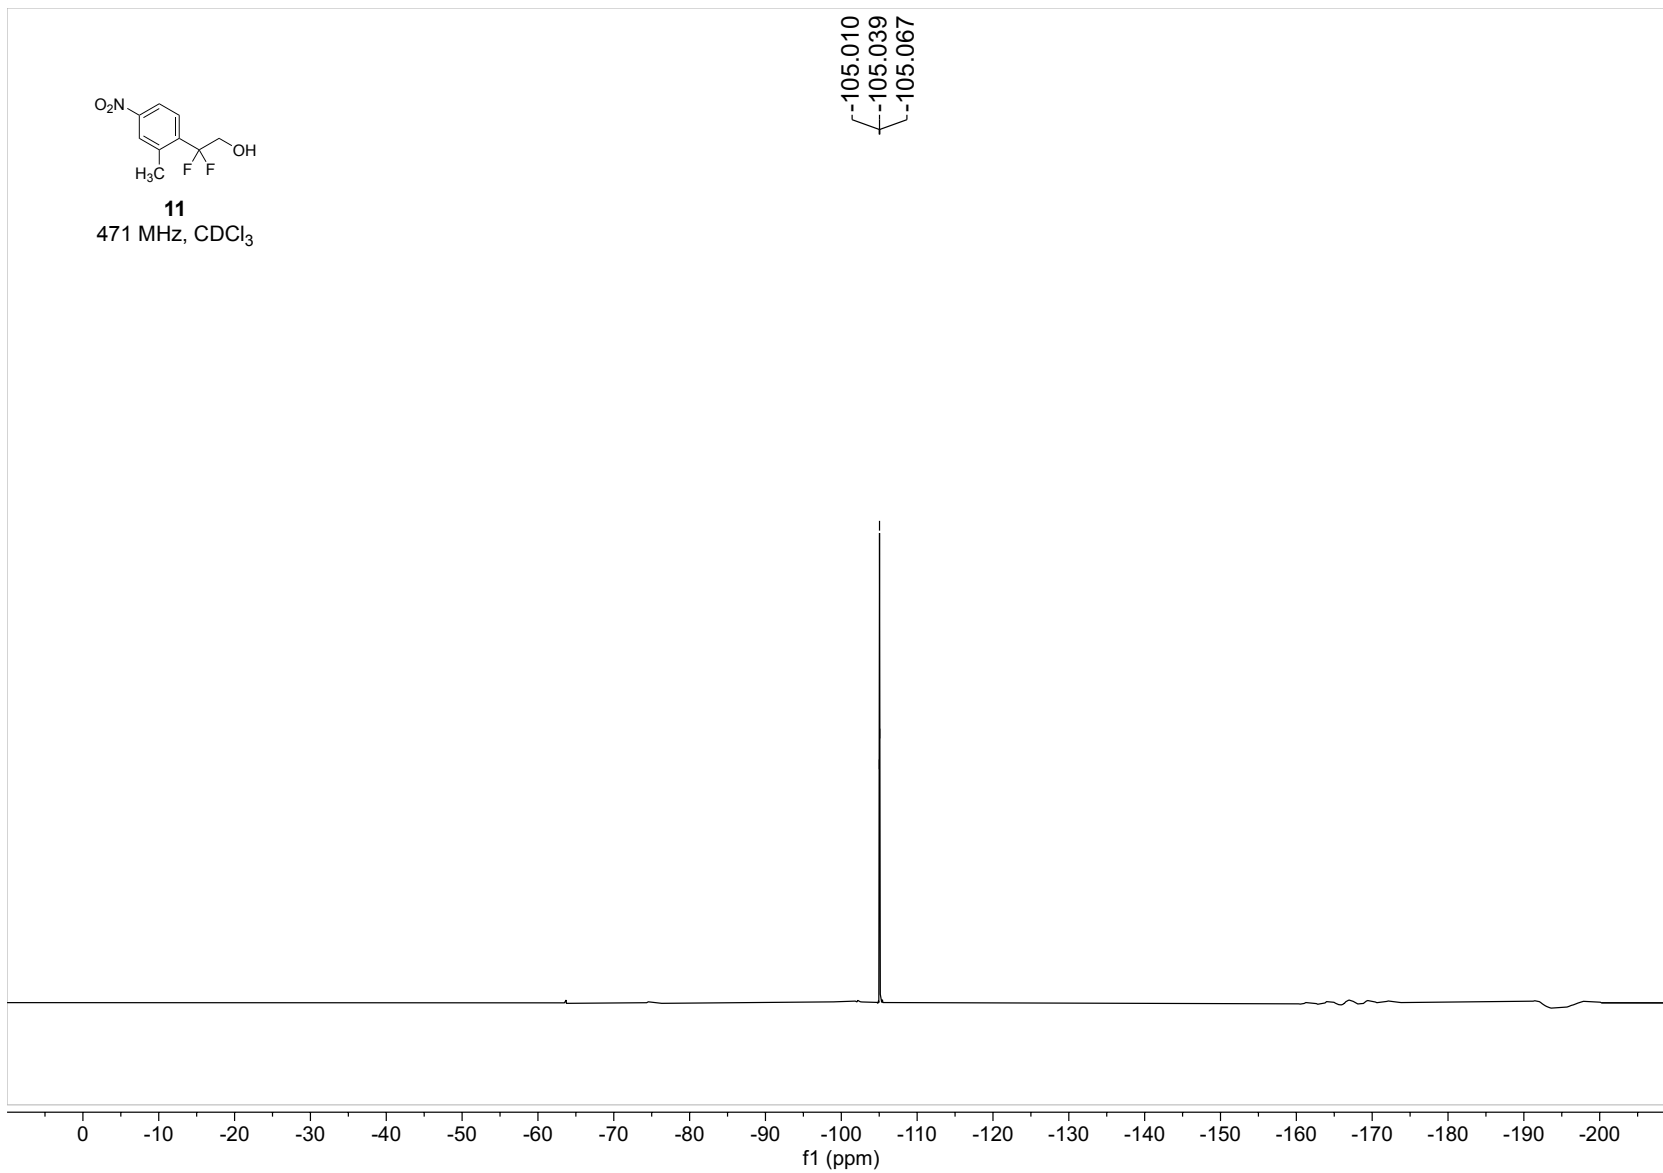

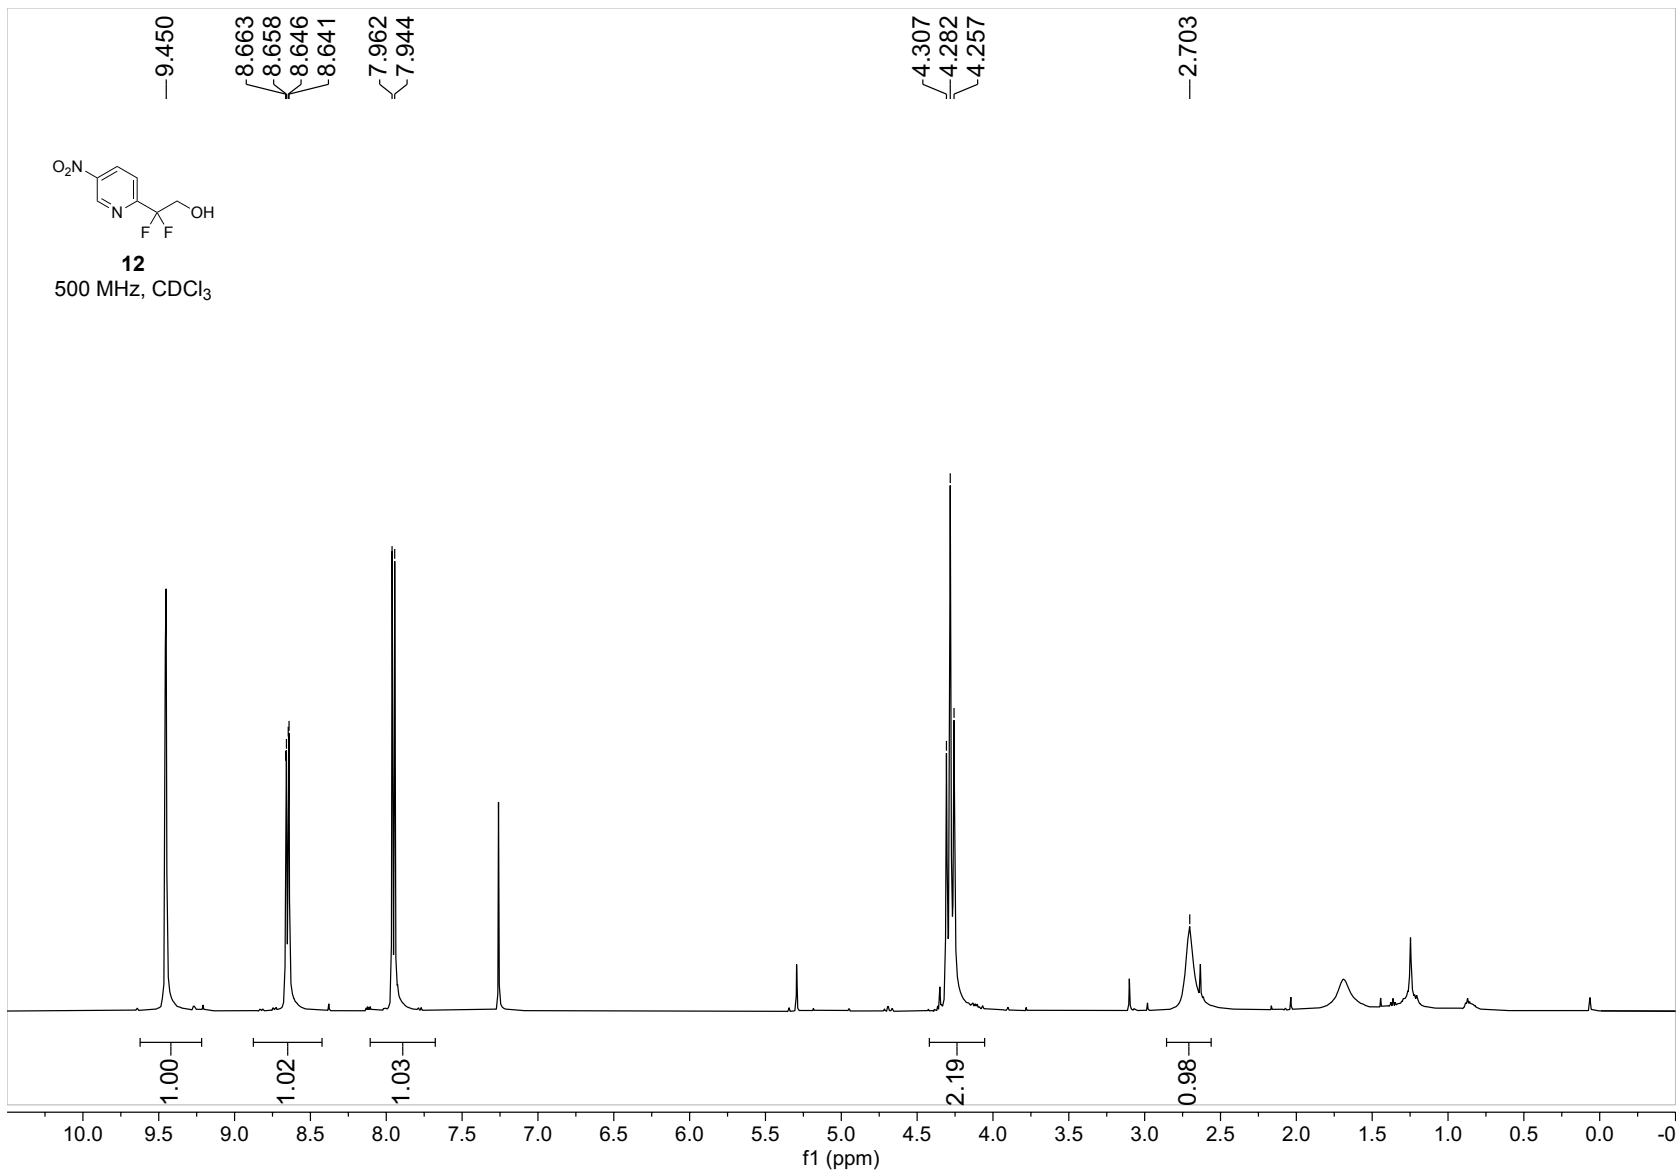

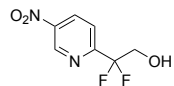

**12**  
125 MHz, CDCl<sub>3</sub>

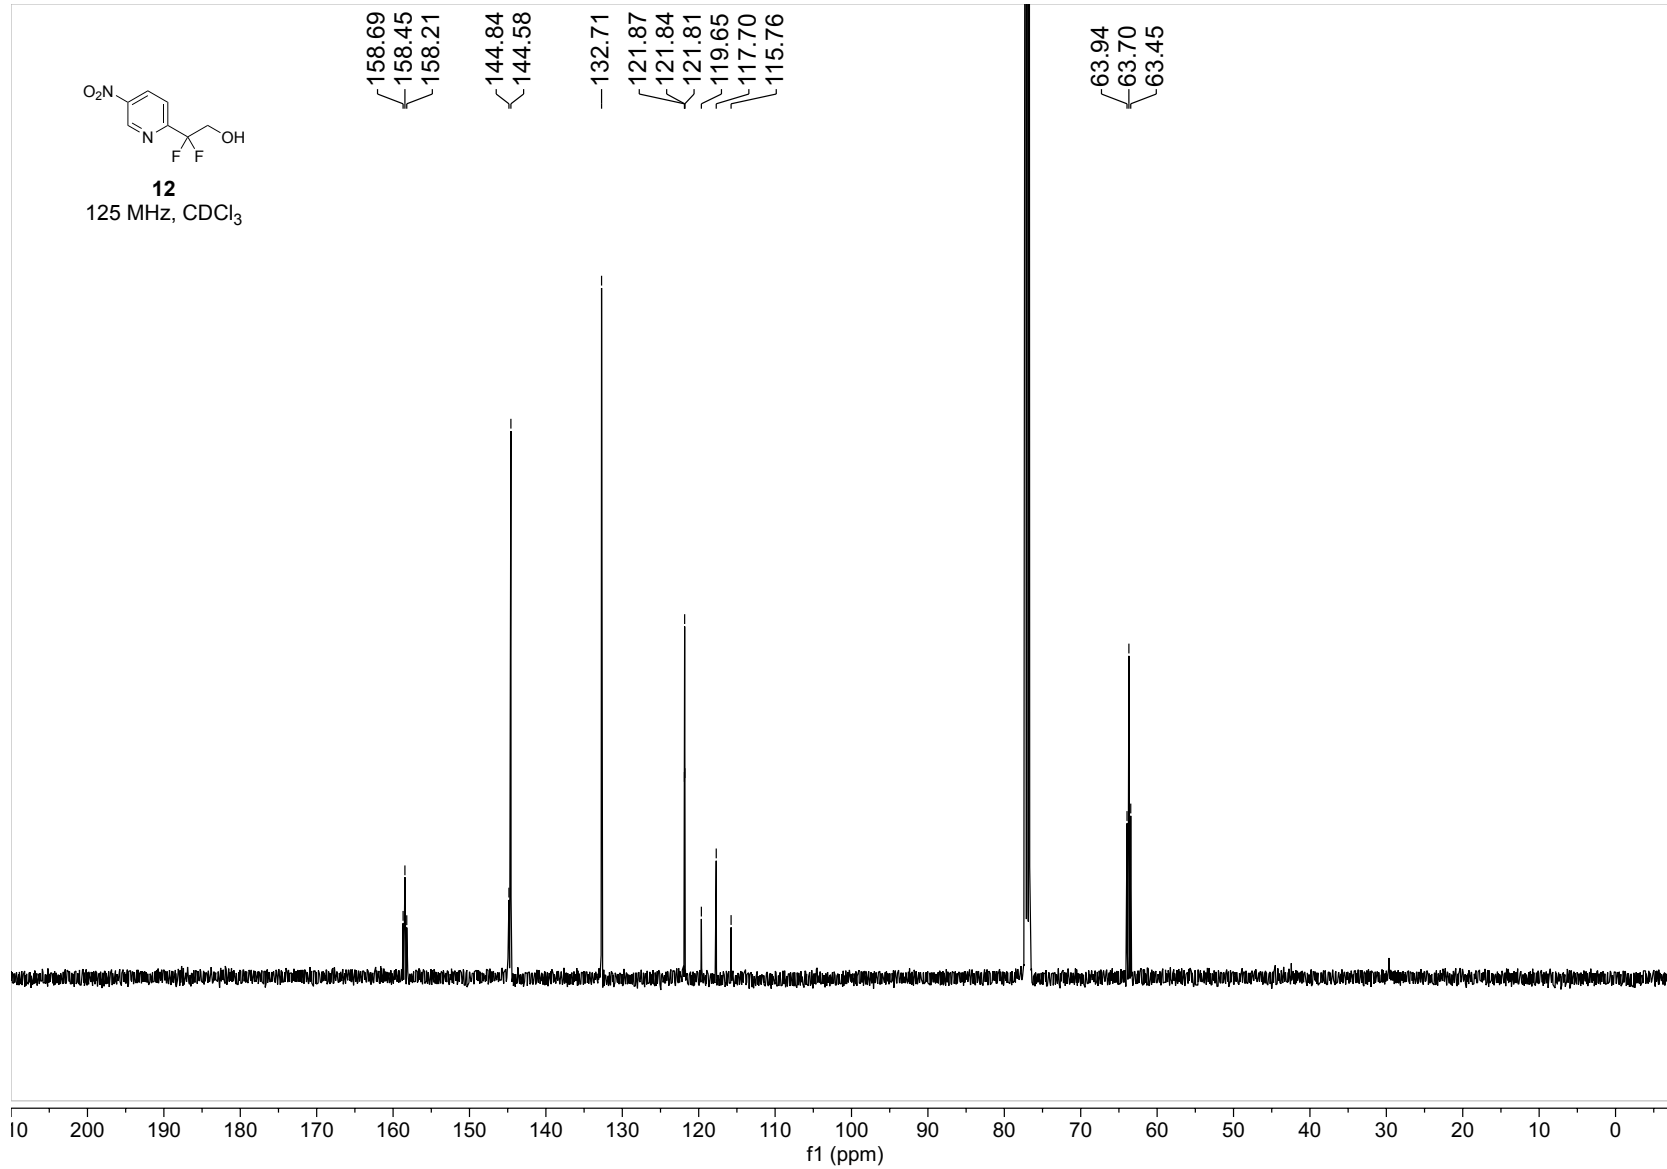



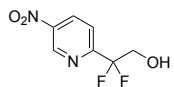

**12**

471 MHz, CDCl<sub>3</sub>

-107.099  
-107.126  
-107.152

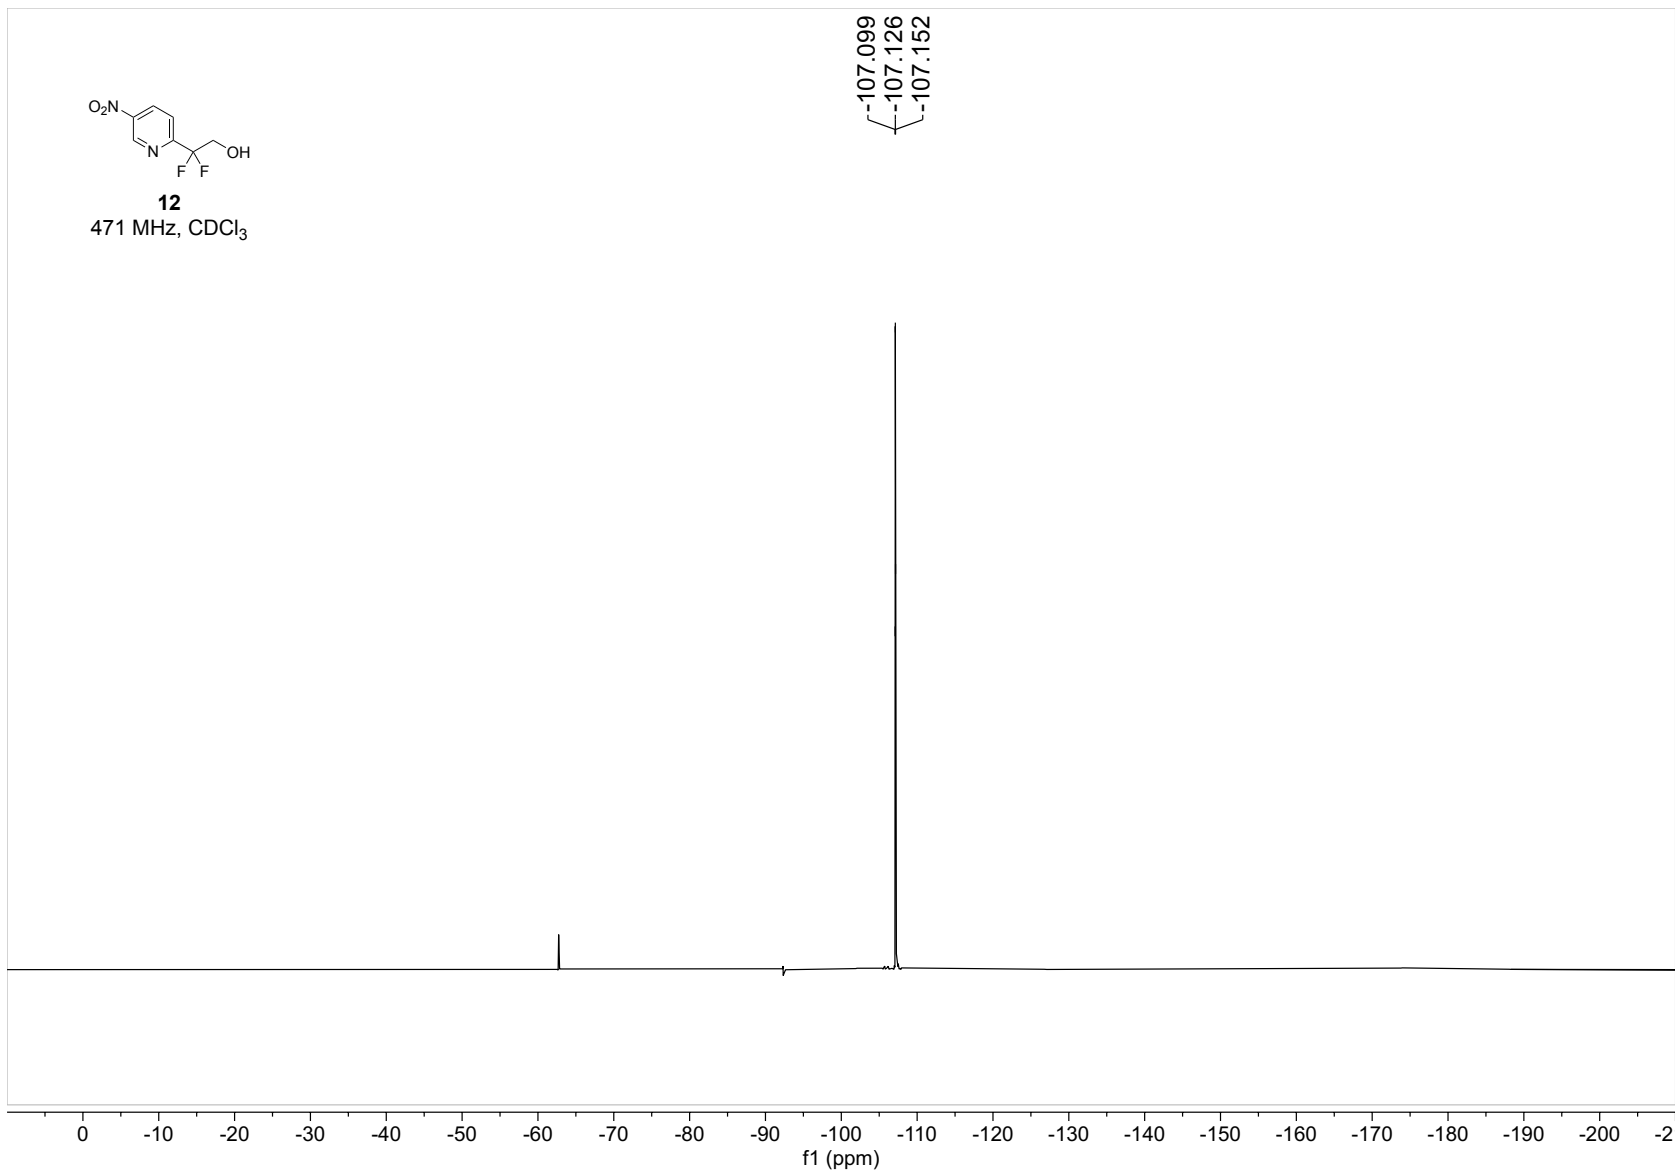

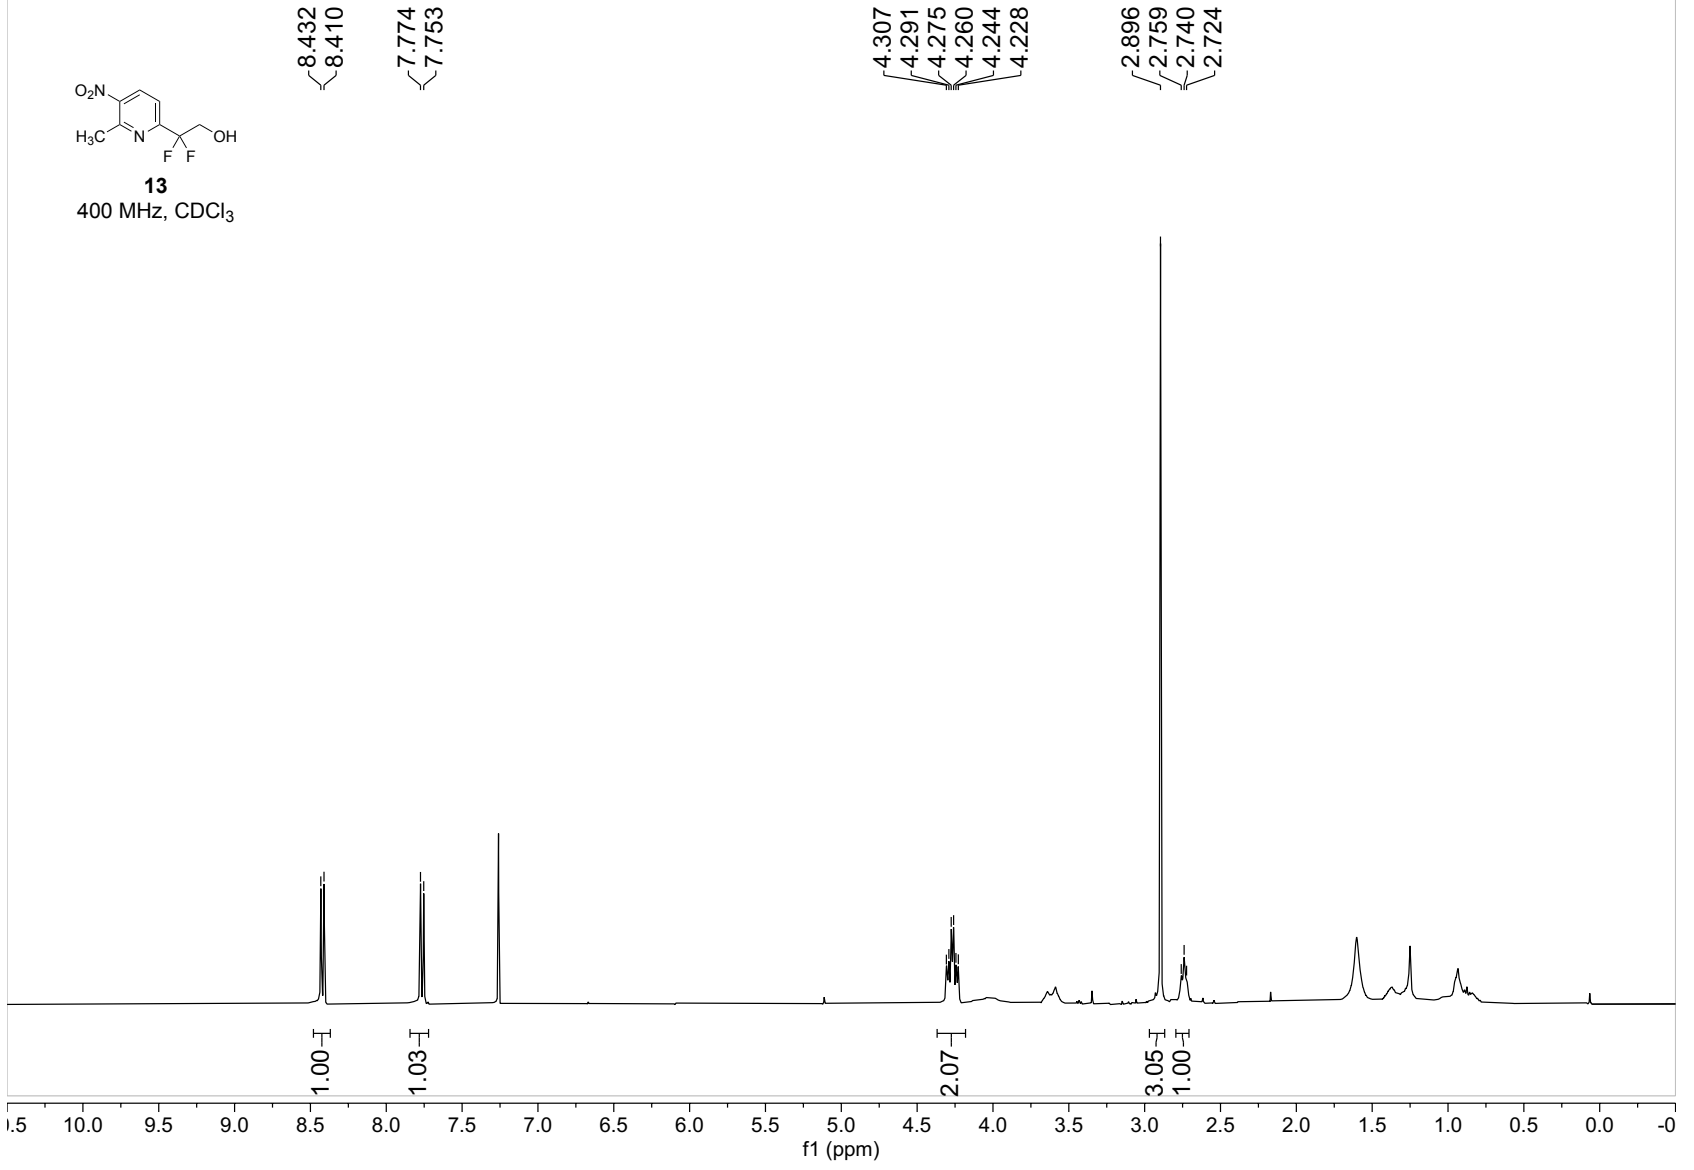

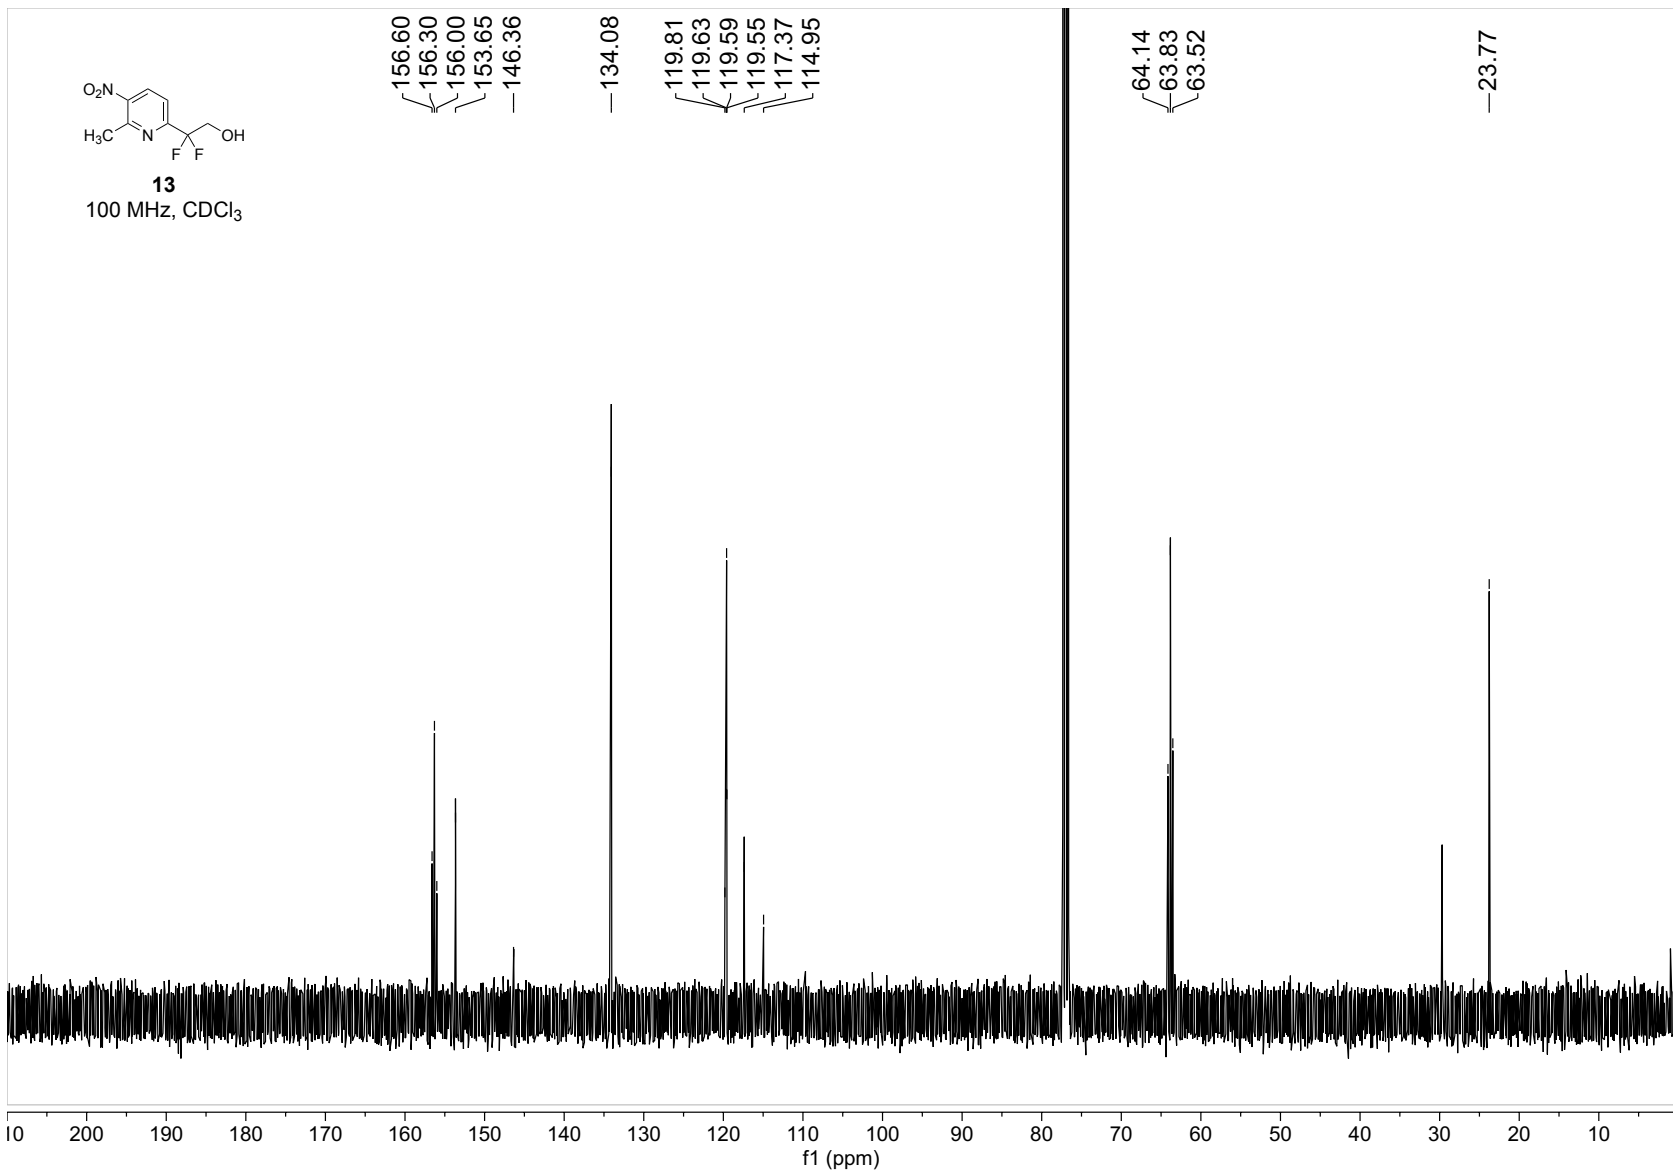

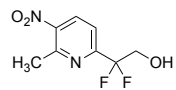

**13**  
471 MHz, CDCl<sub>3</sub>

108.14  
108.18  
108.21

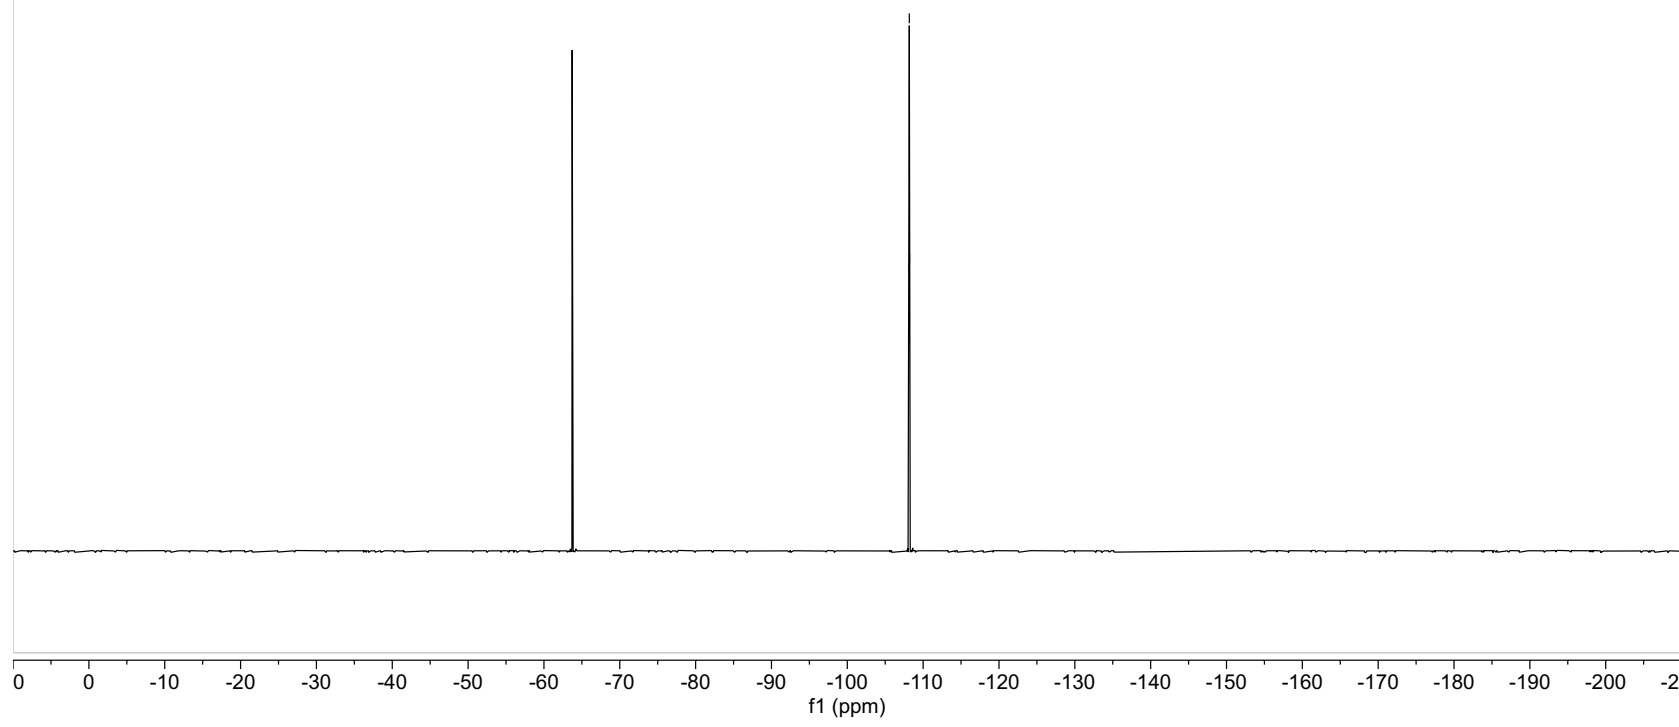

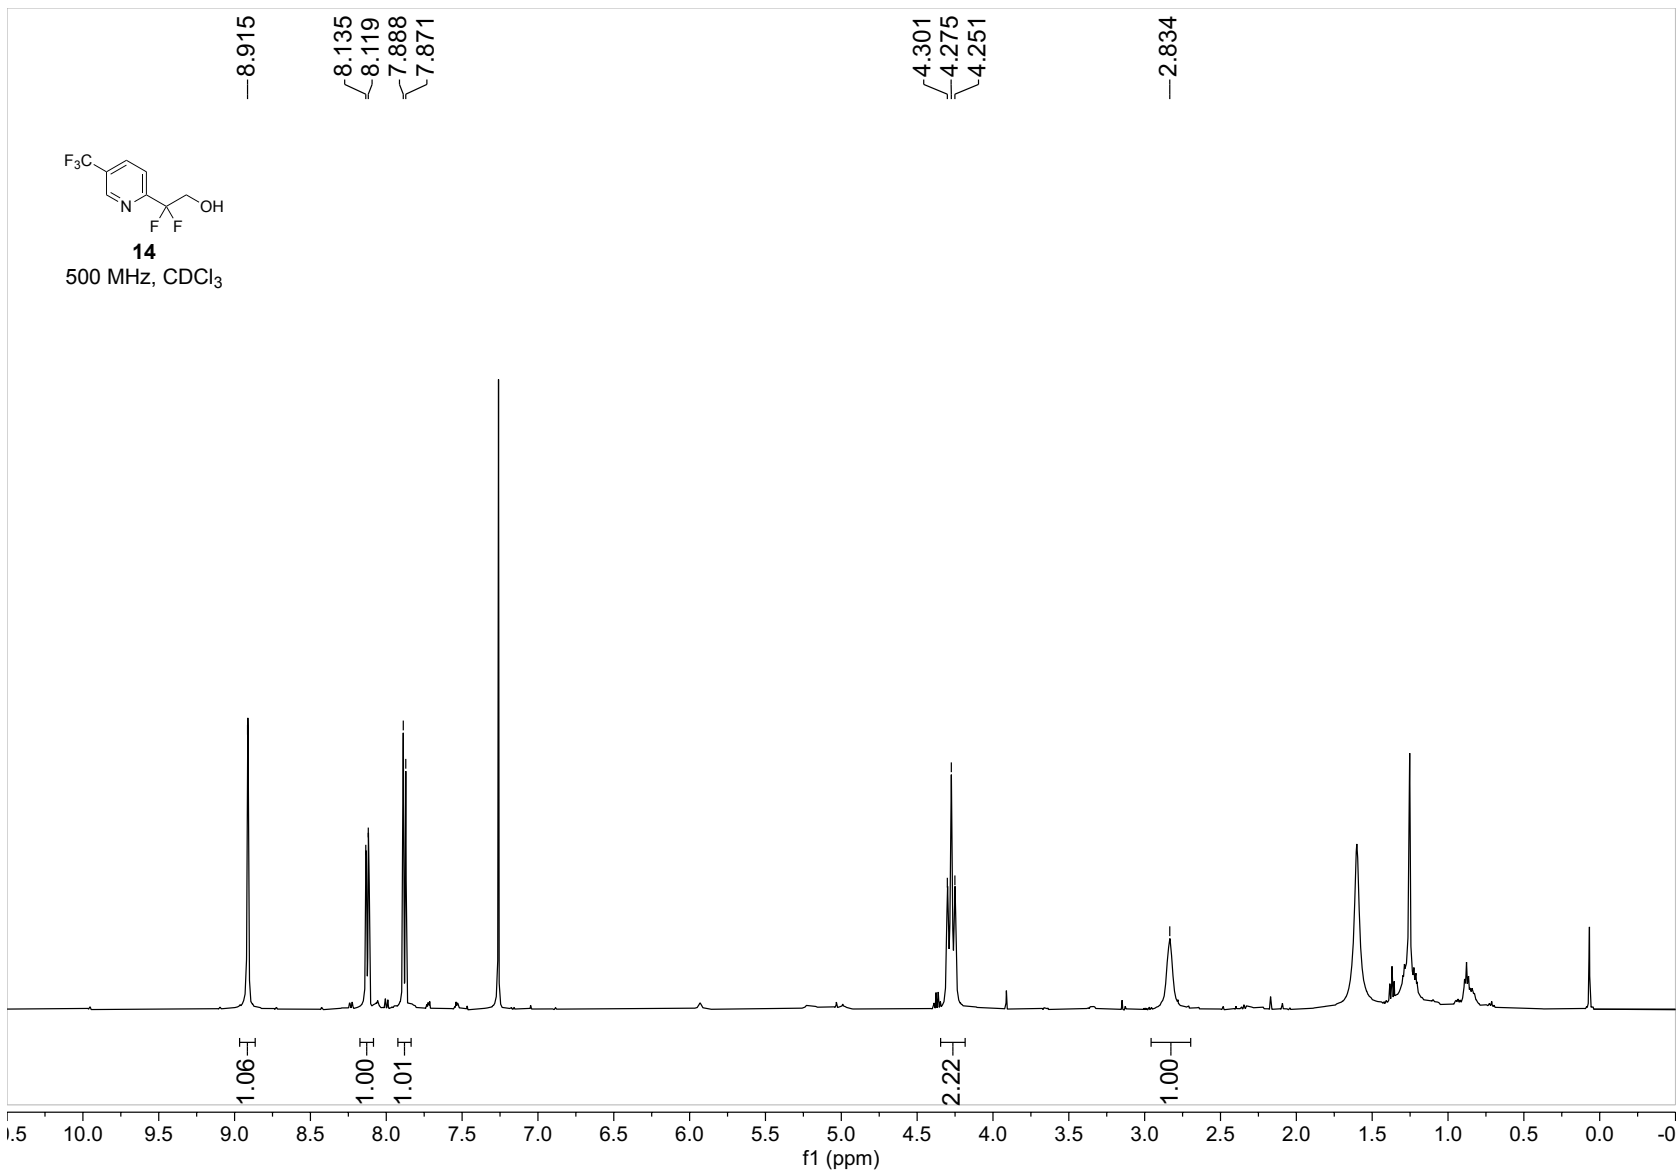

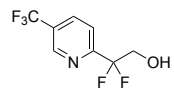

**14**

125 MHz, CDCl<sub>3</sub>

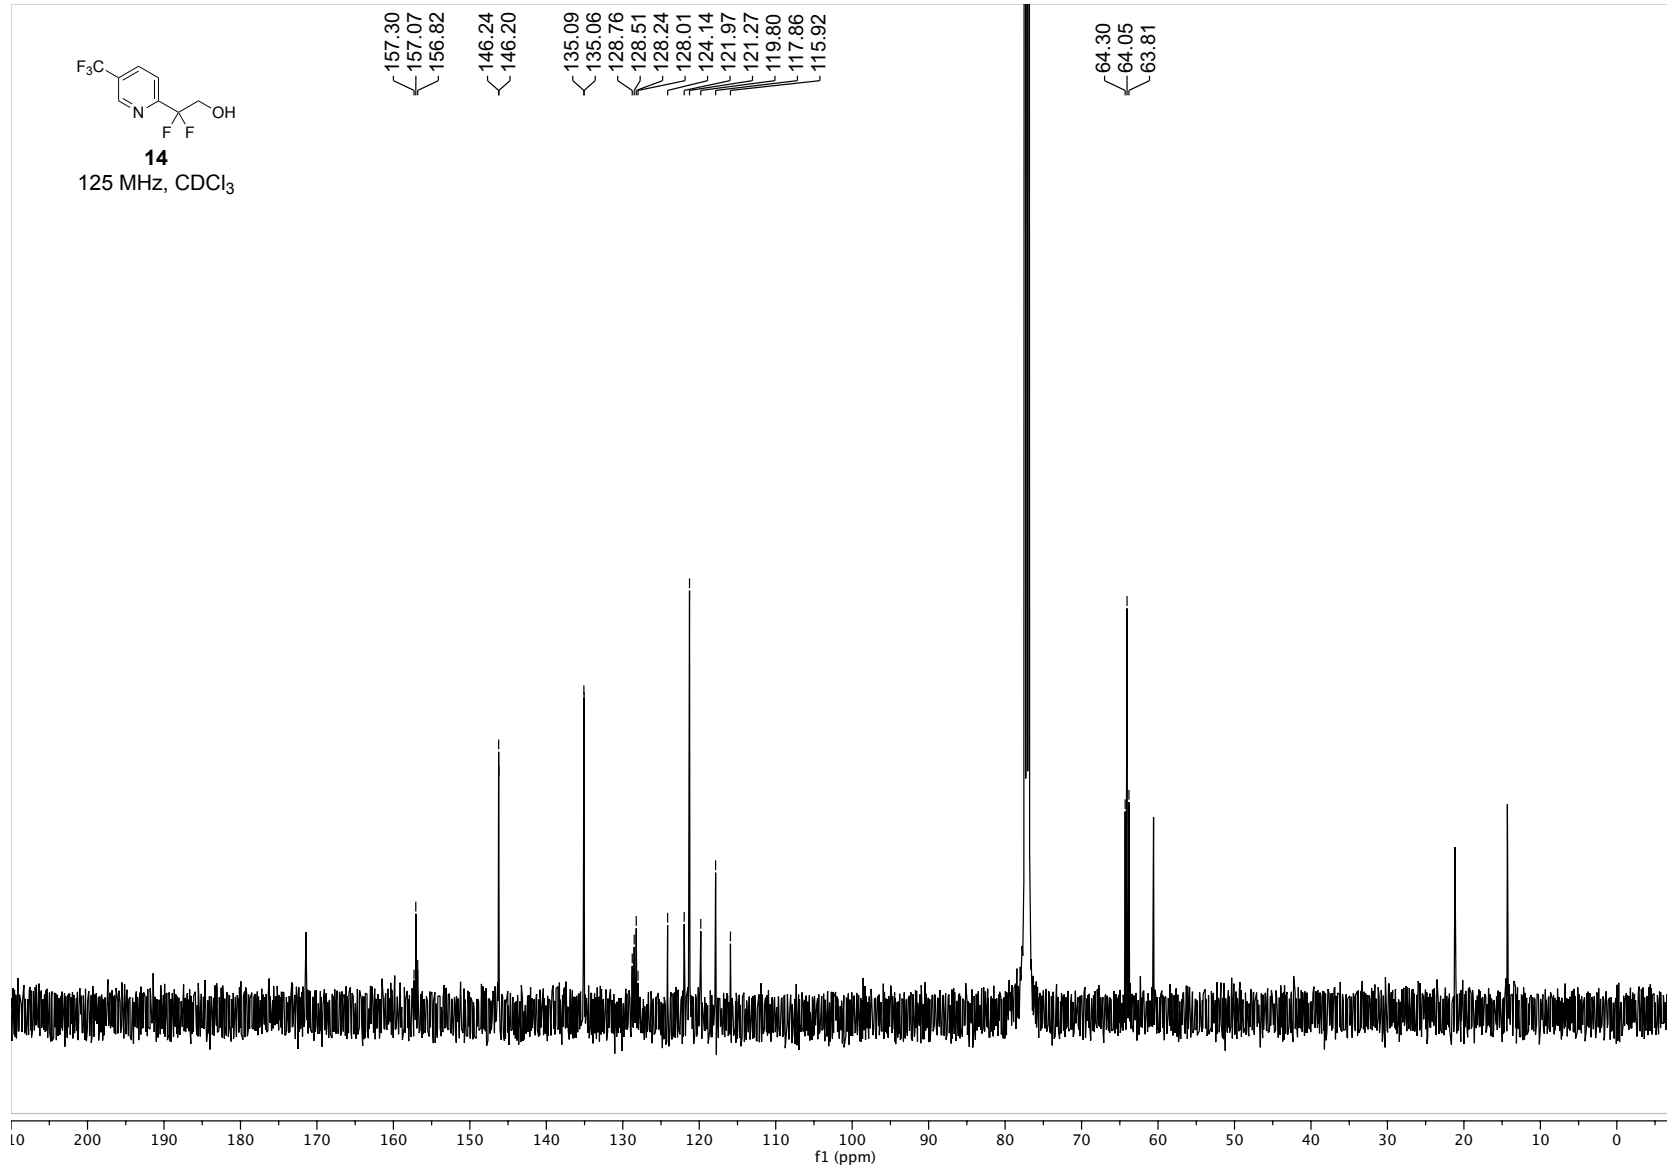

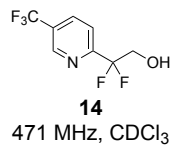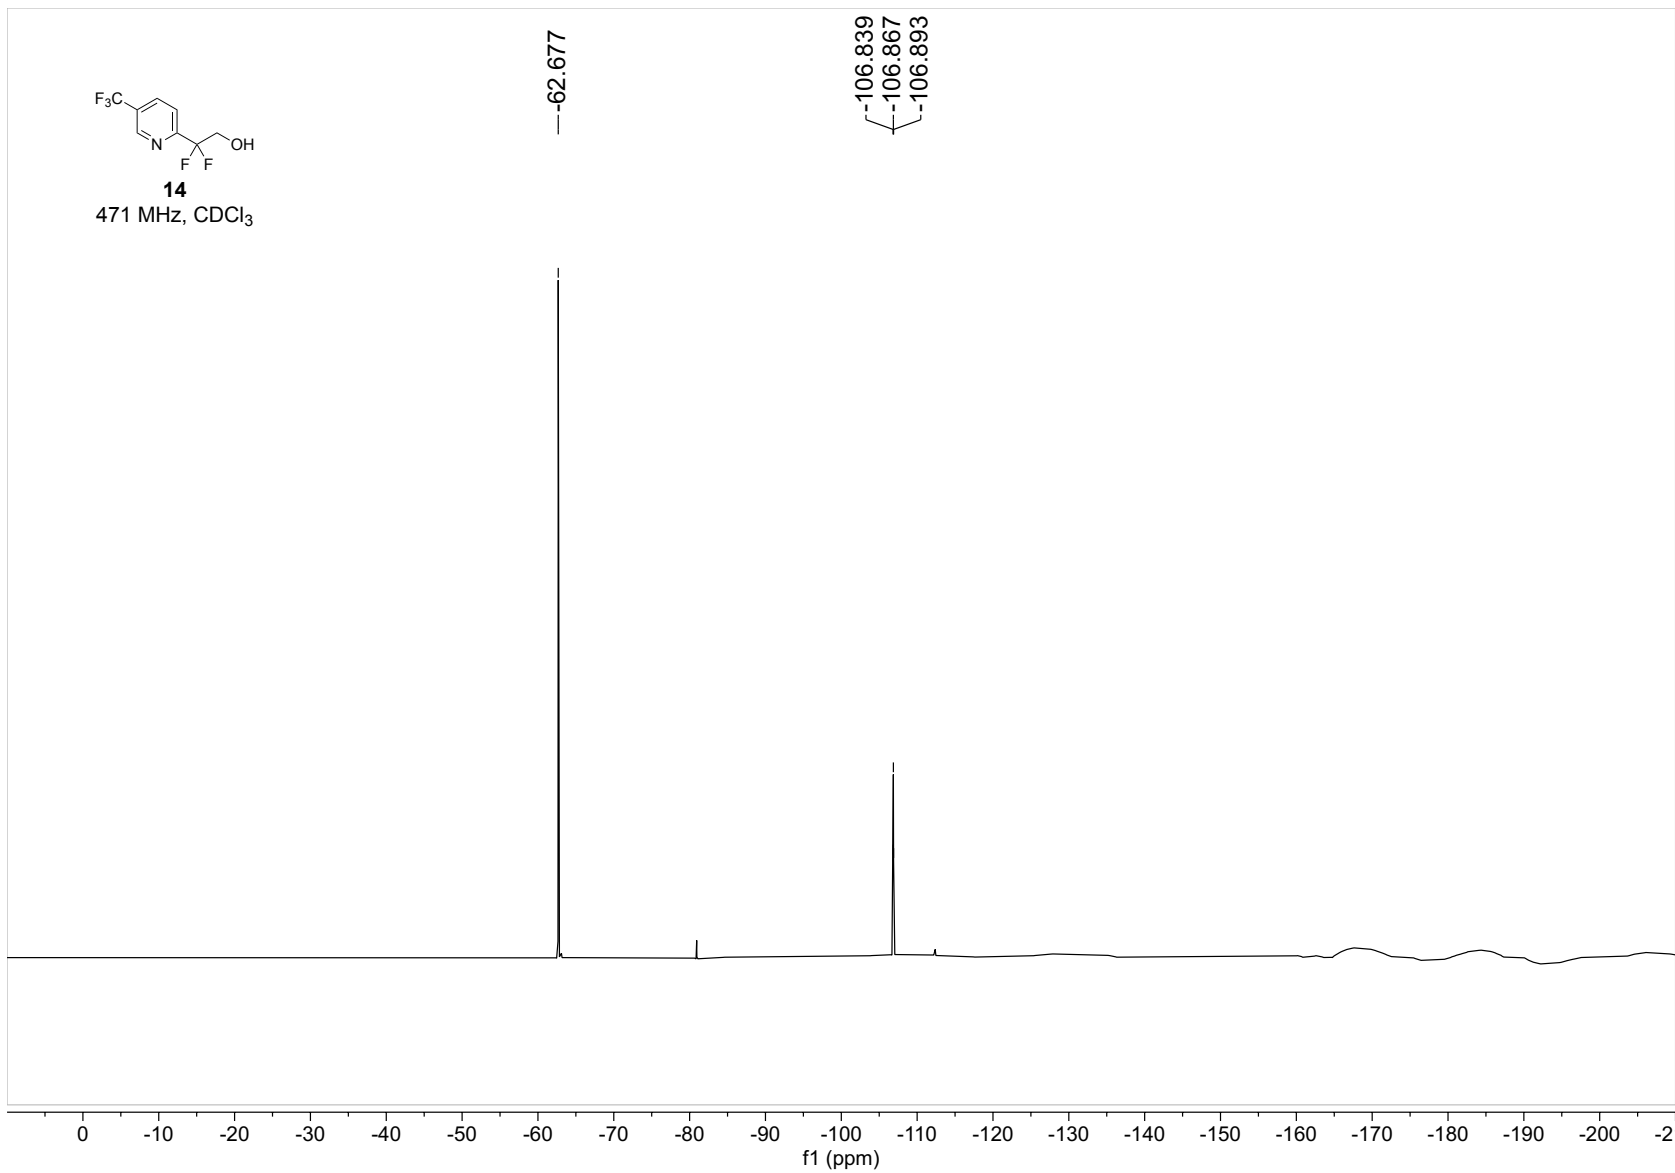

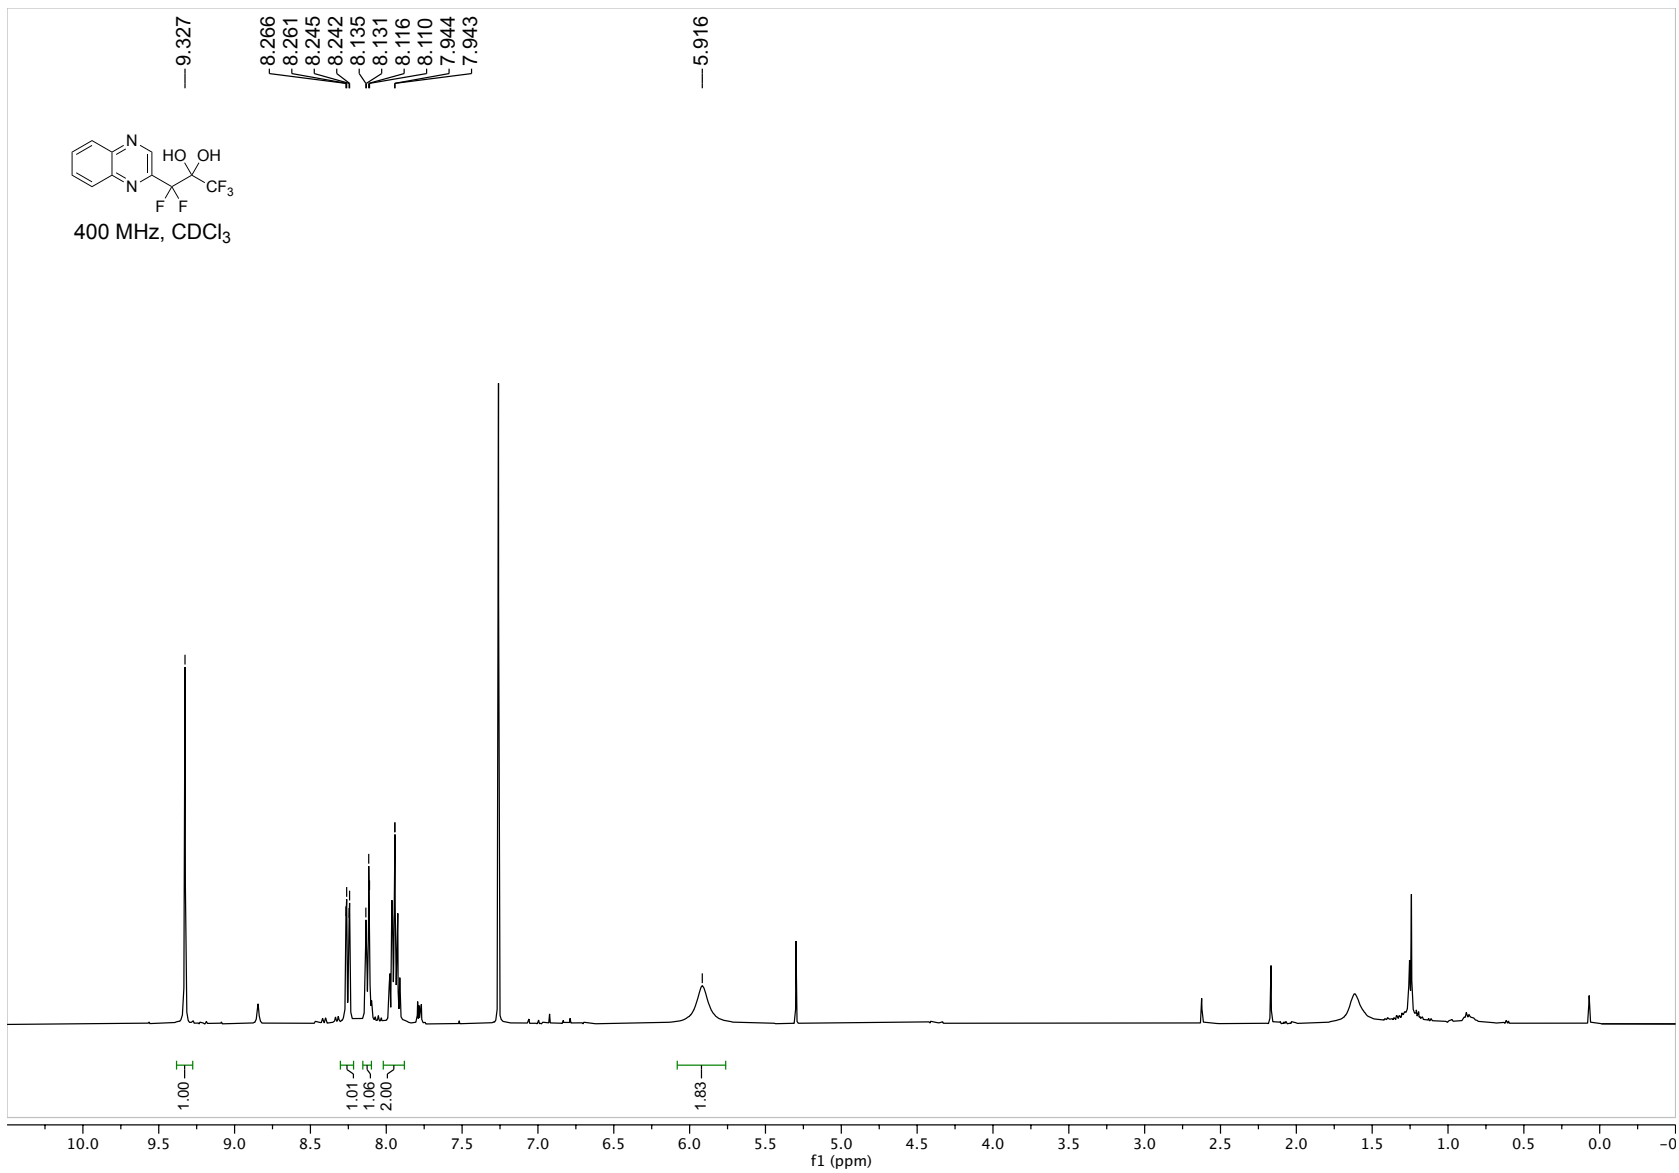



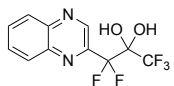

125 MHz, CDCl<sub>3</sub>

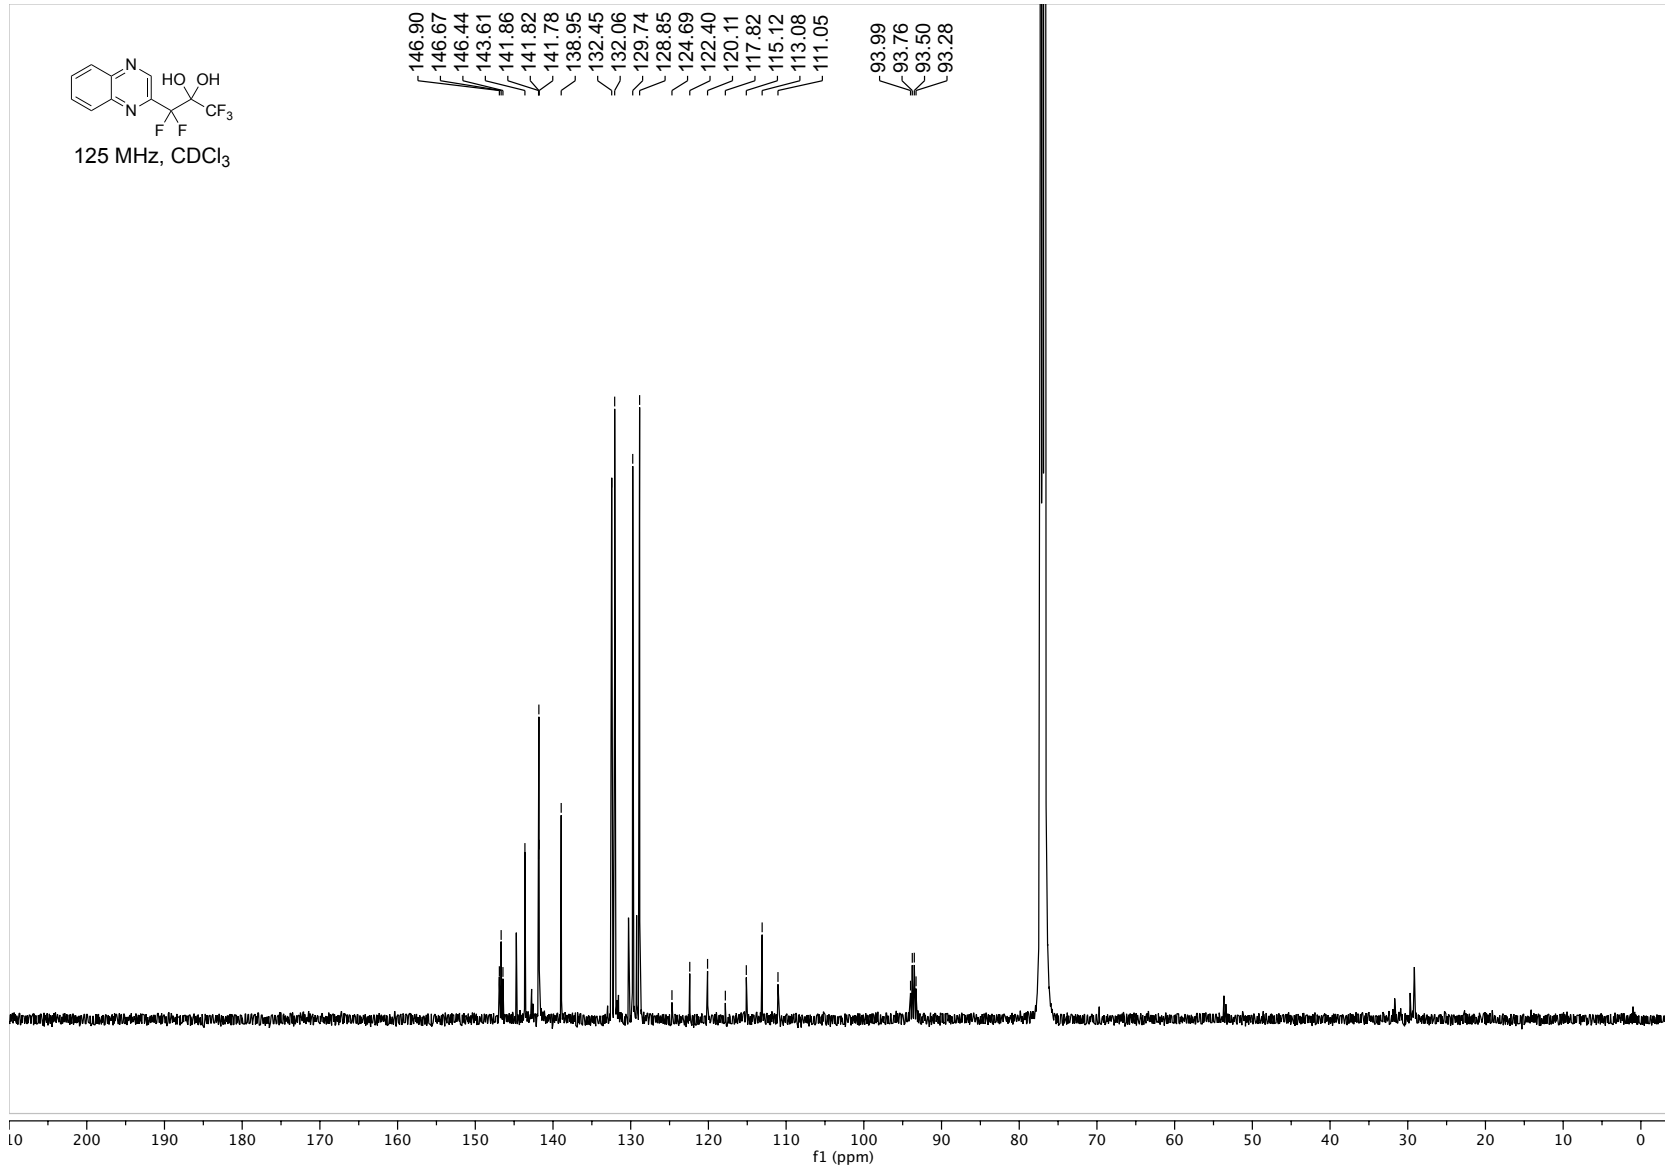

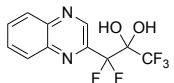

376 MHz, CDCl<sub>3</sub>

-80.71  
-80.74  
-80.77

-111.76  
-111.79  
-111.82  
-111.85

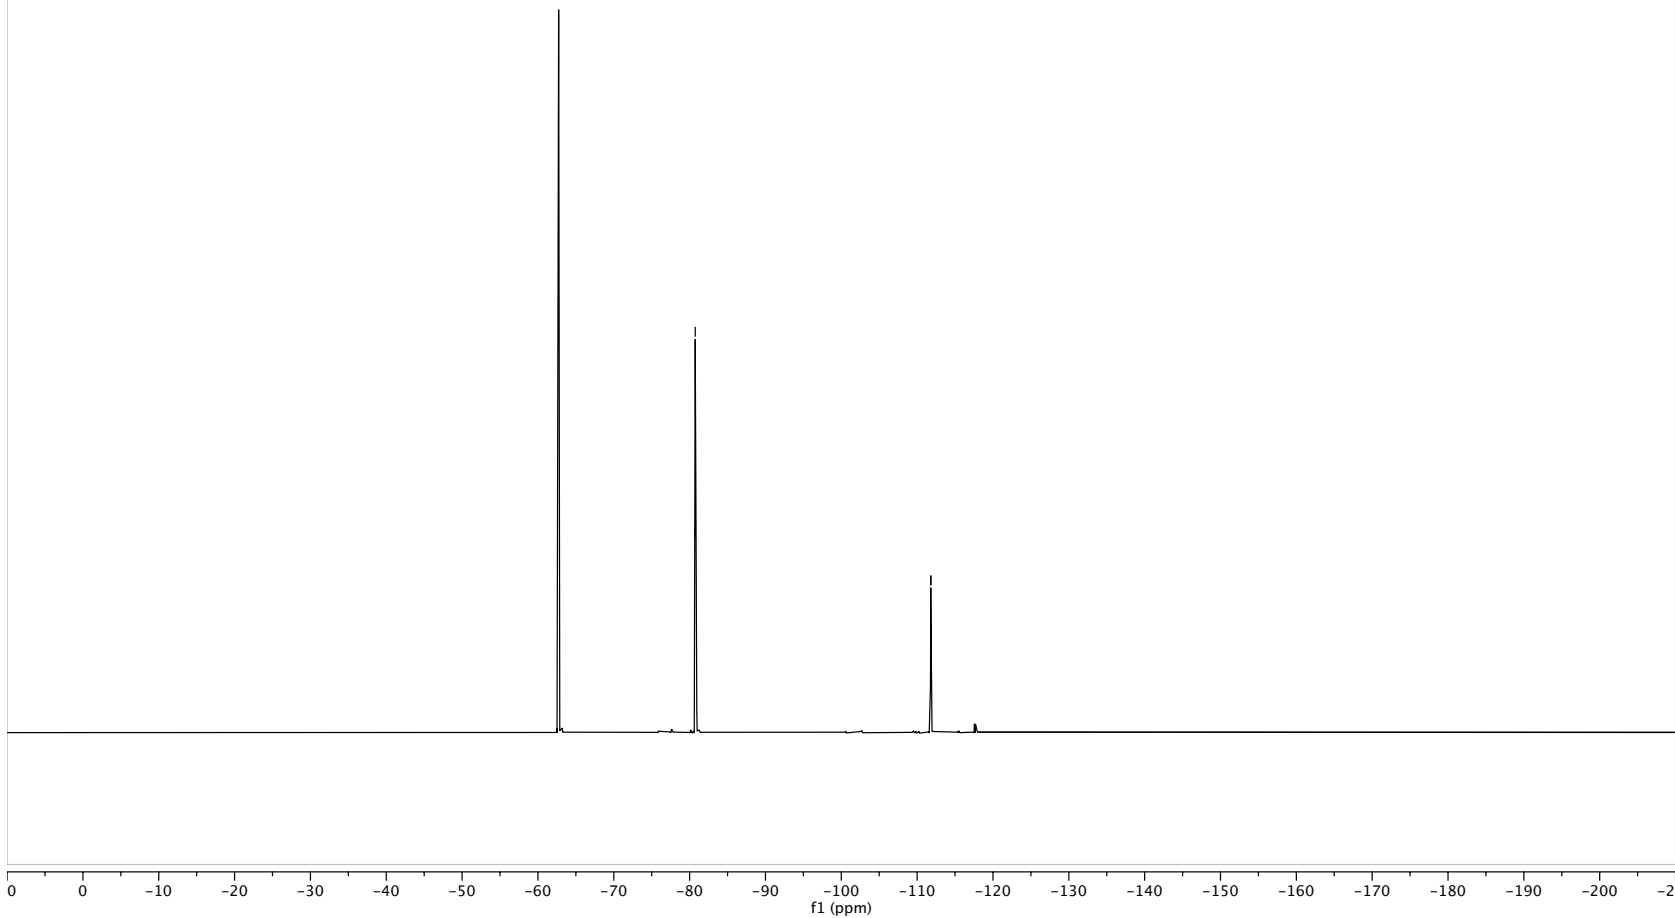

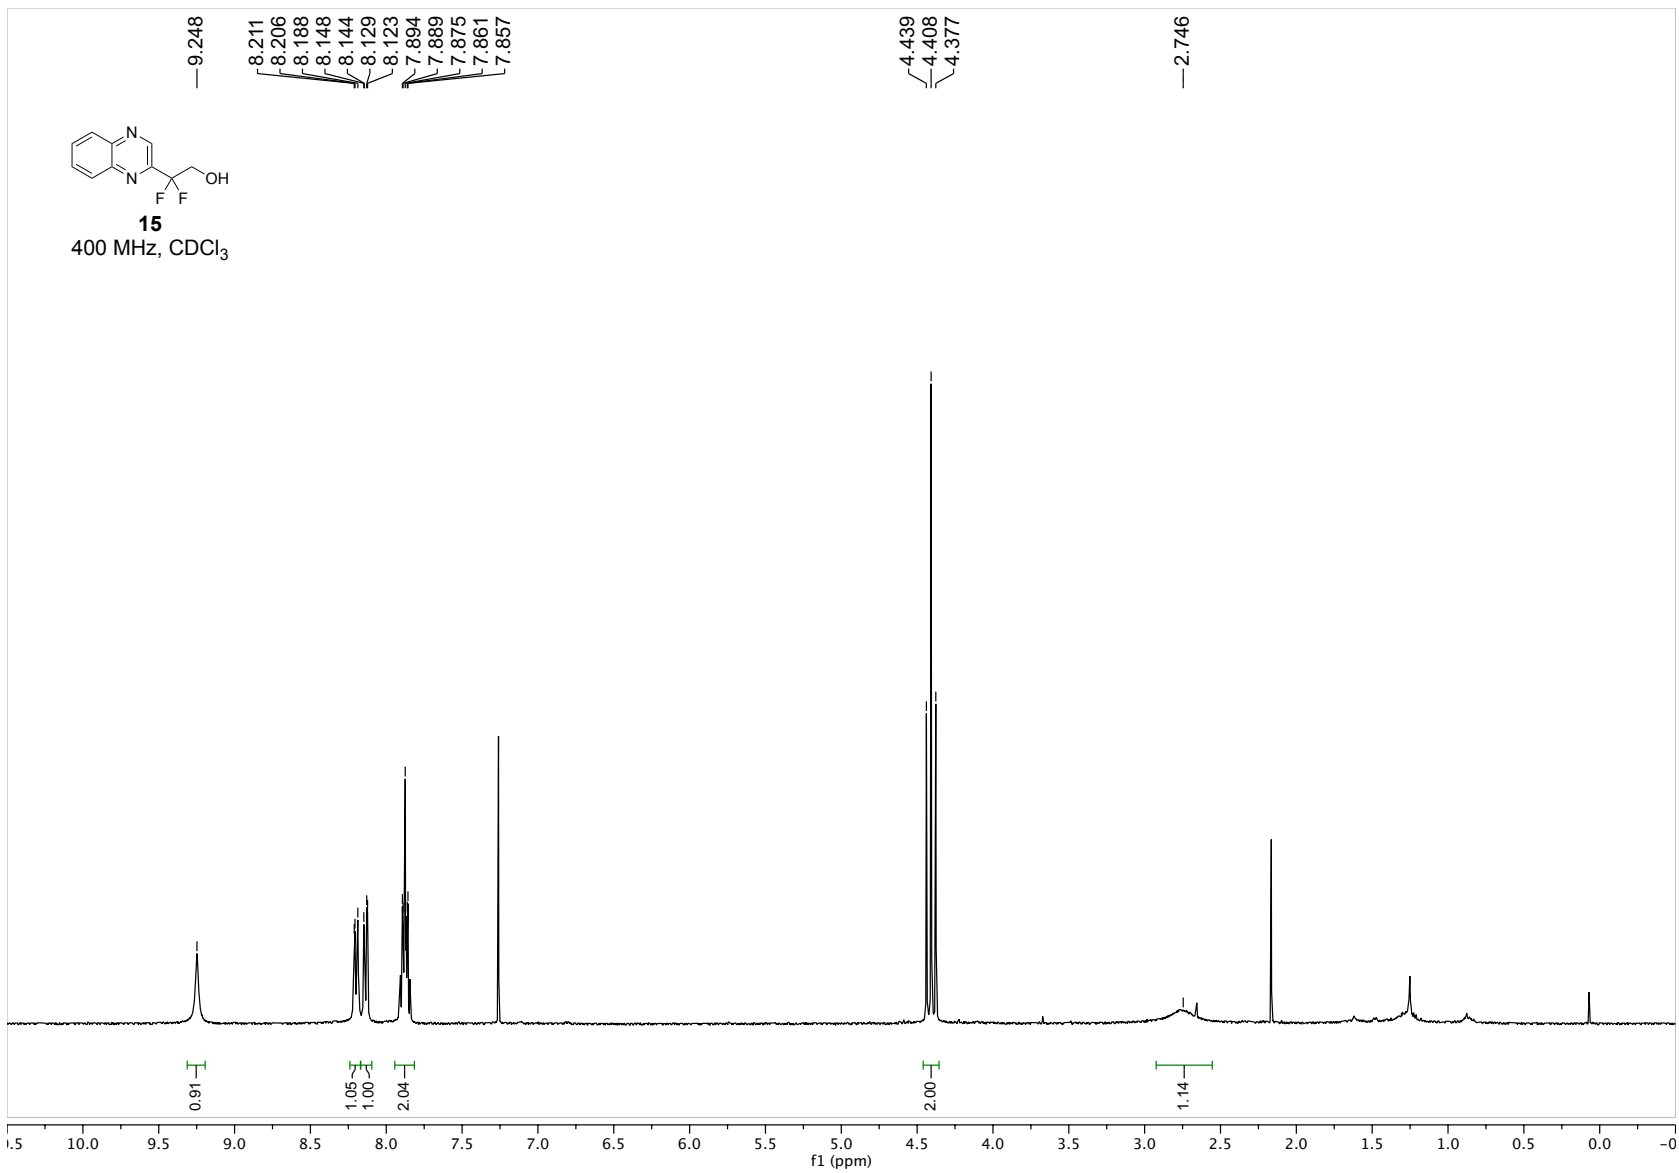

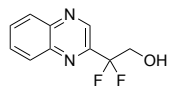

**15**

100 MHz, CDCl<sub>3</sub>

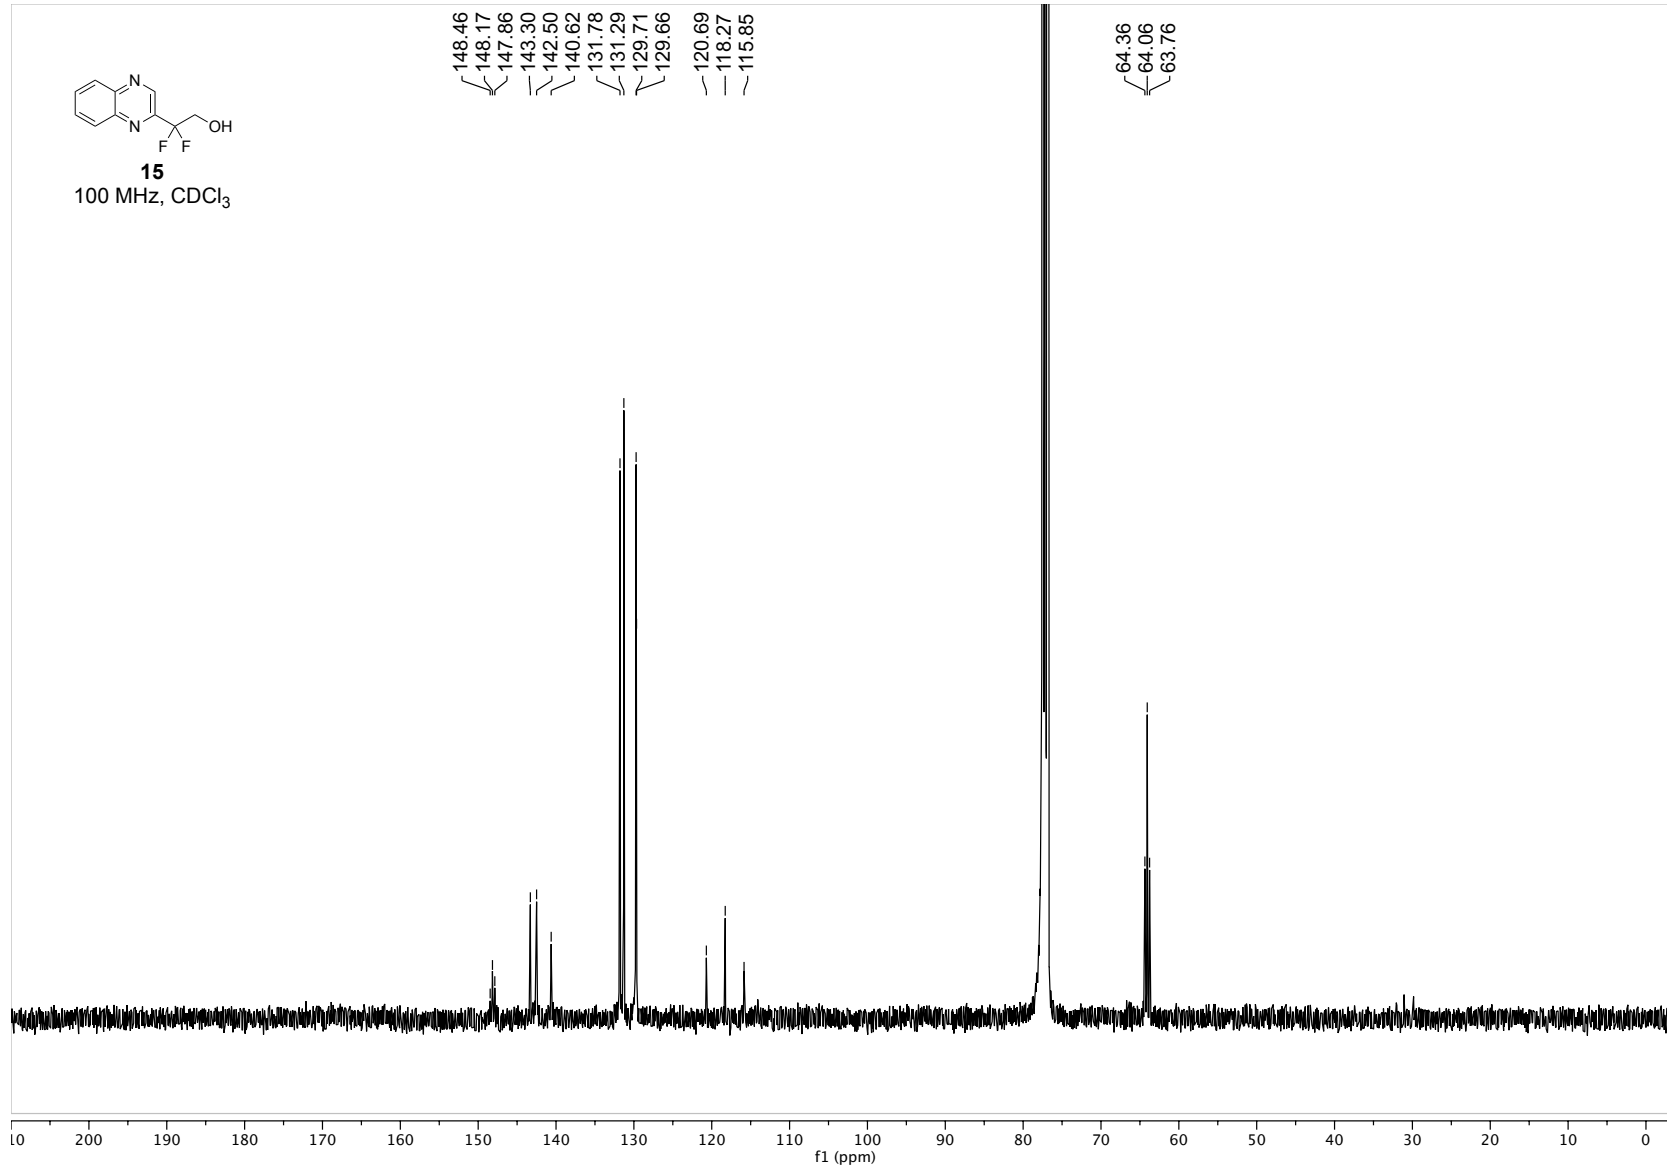

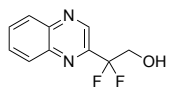

**15**  
376 MHz, CDCl<sub>3</sub>

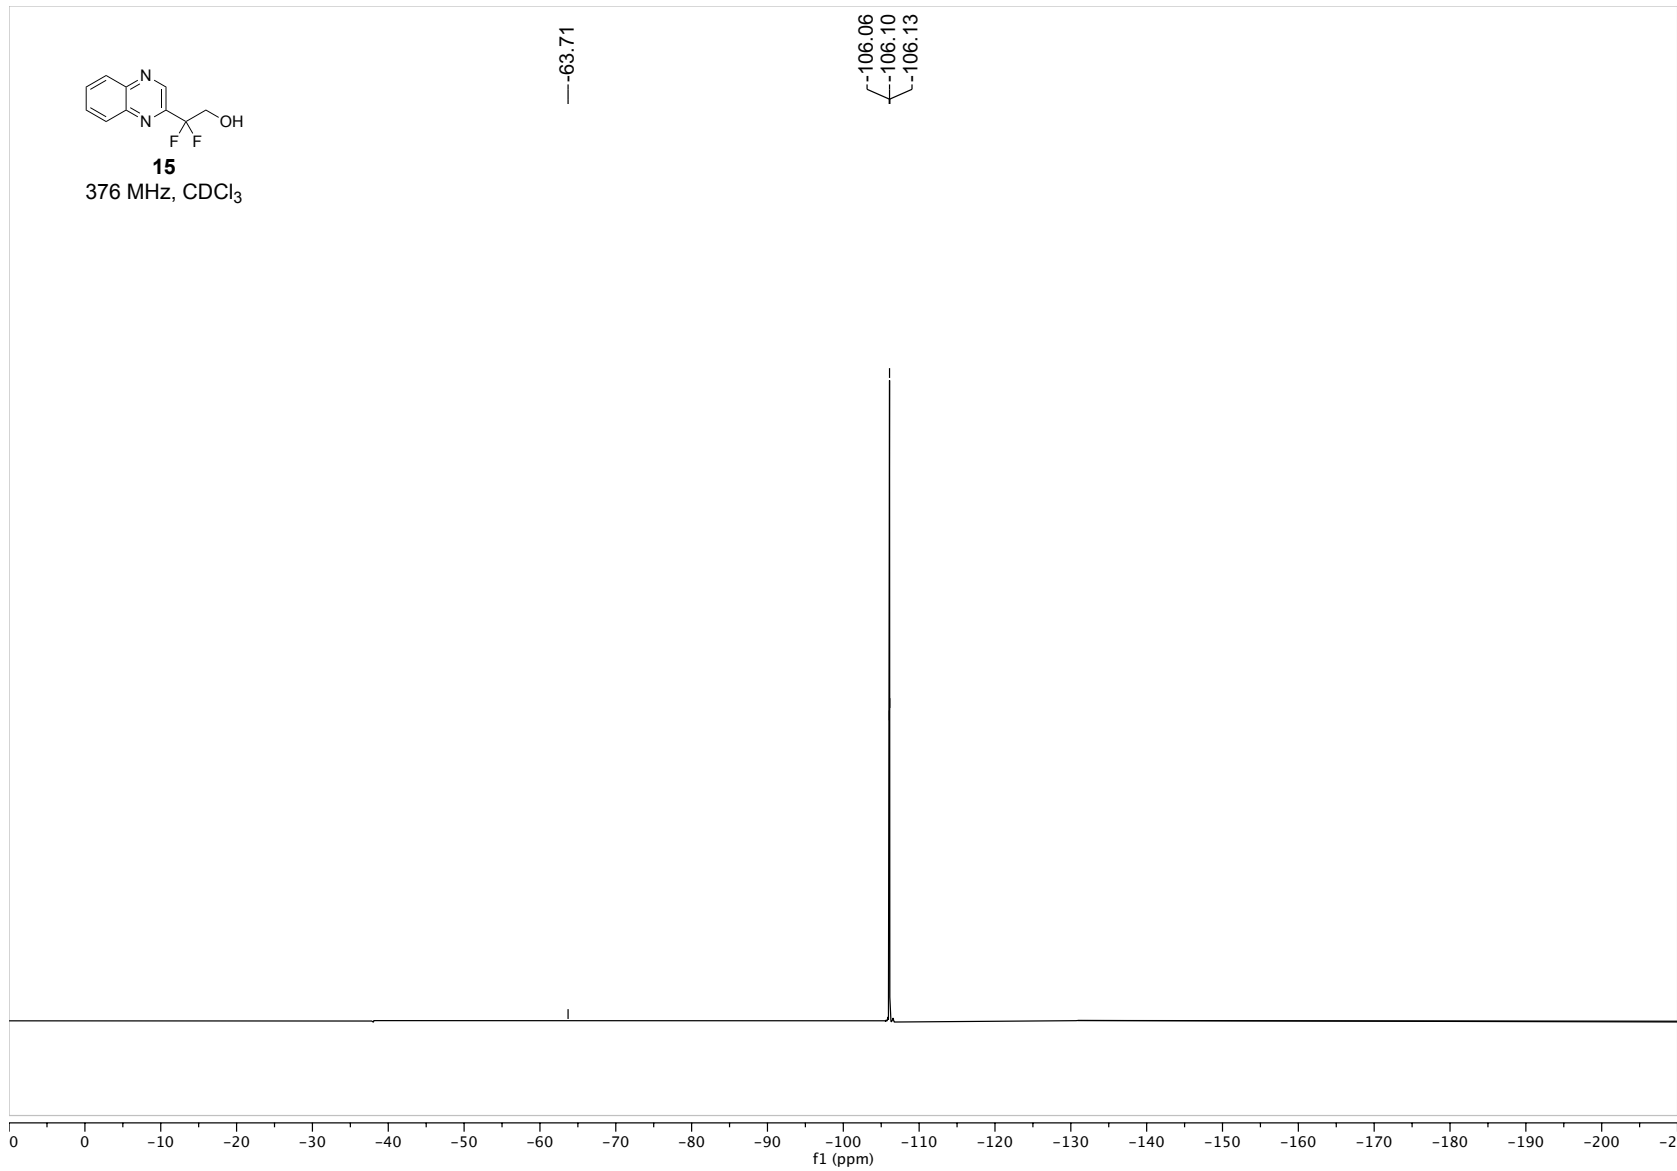

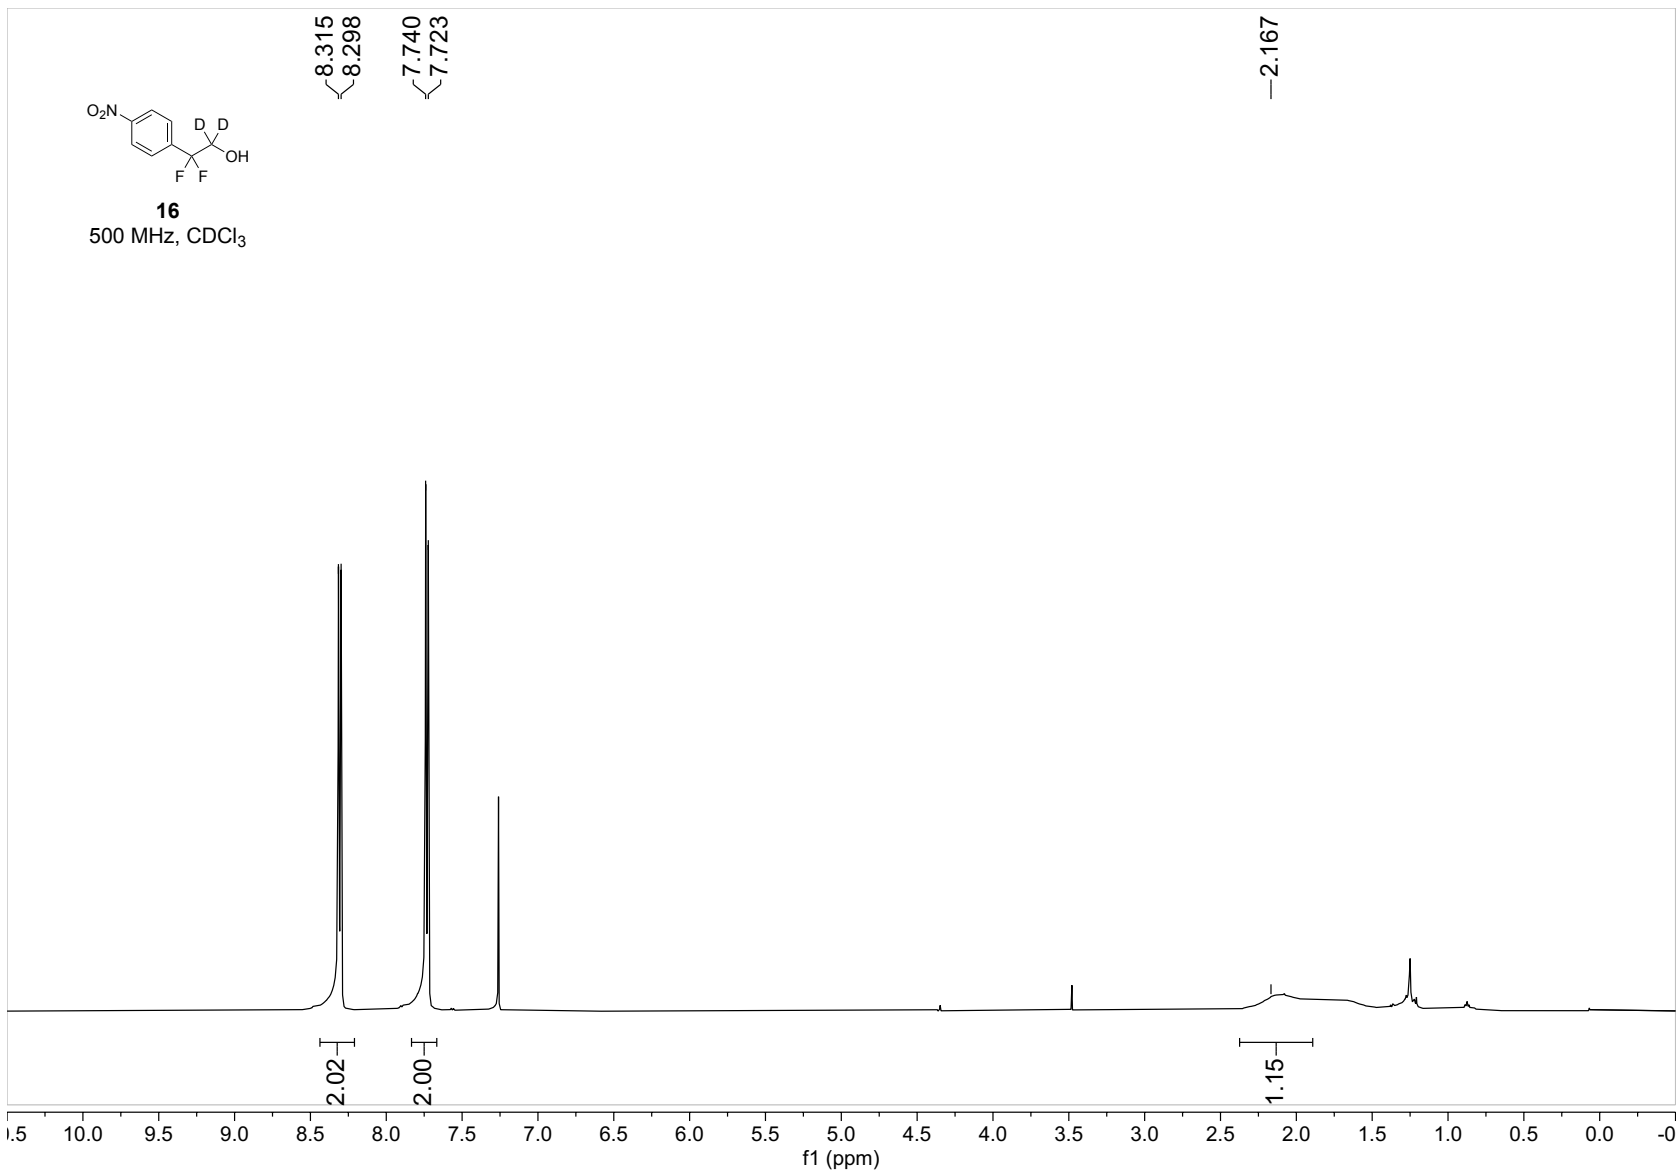

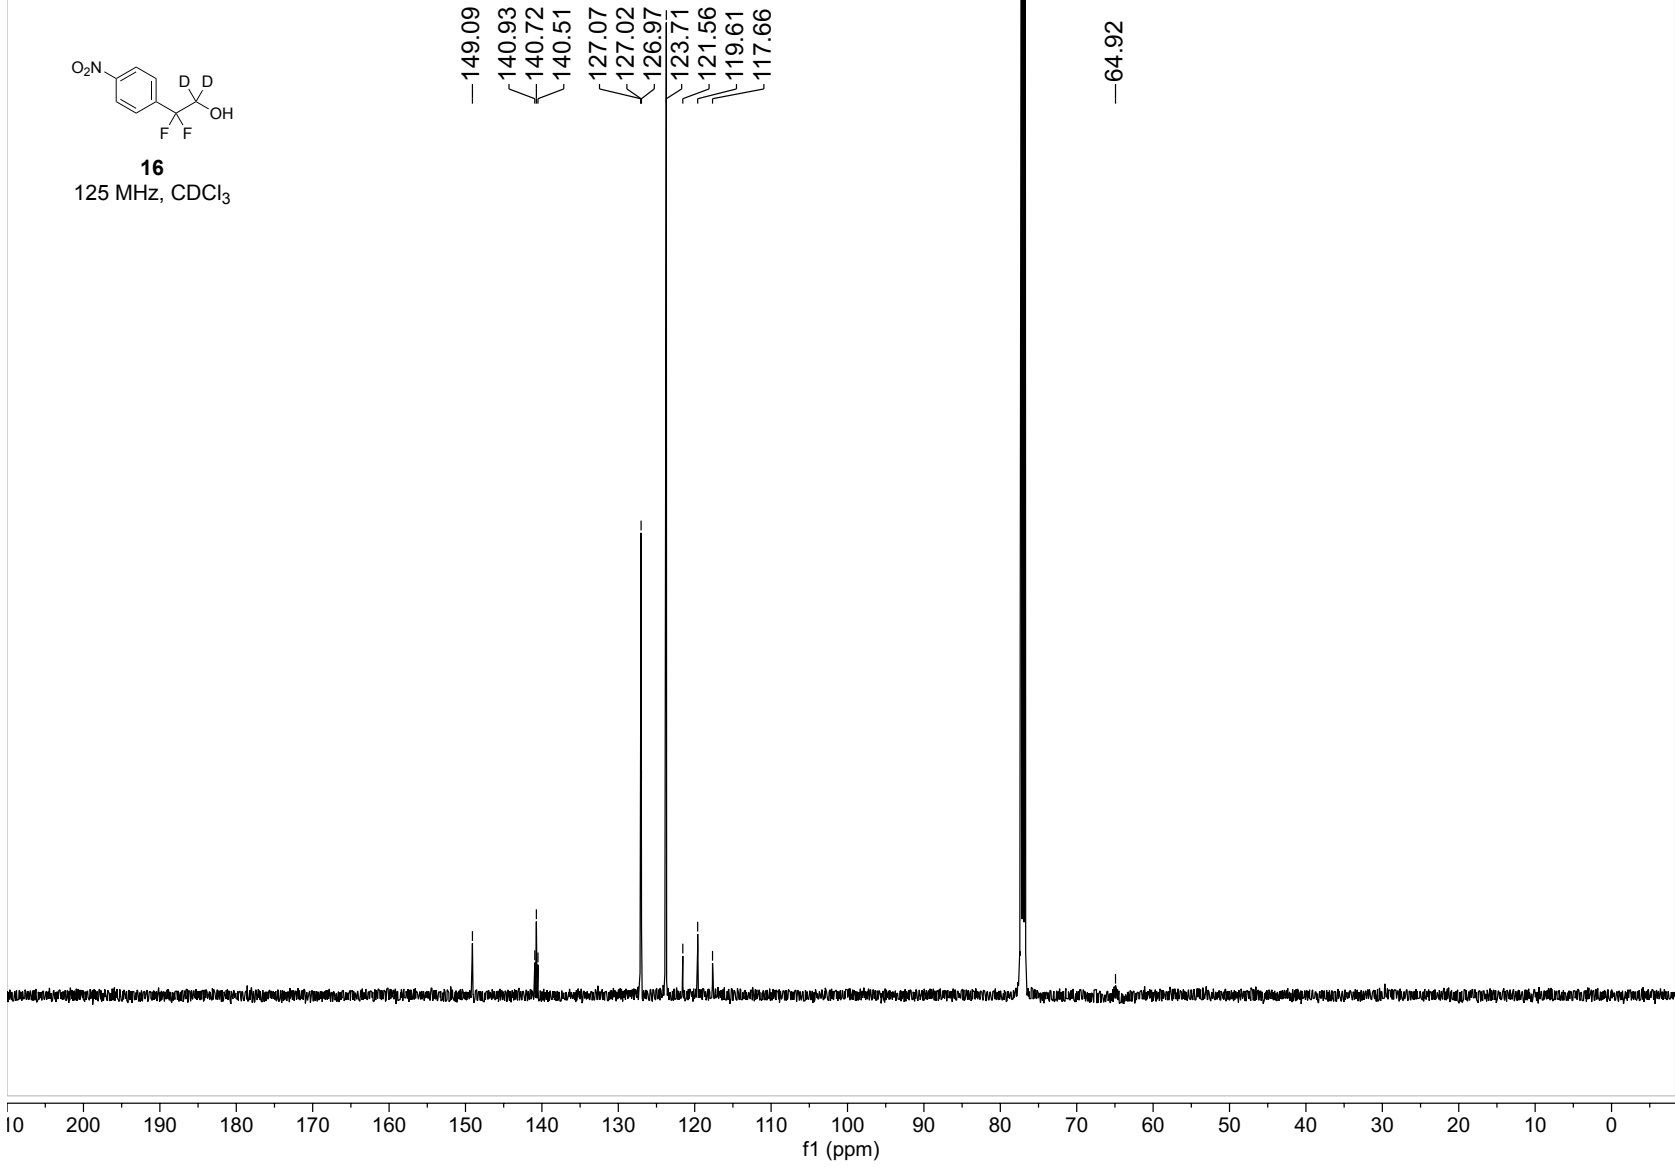

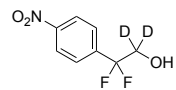

**16**  
471 MHz, CDCl<sub>3</sub>

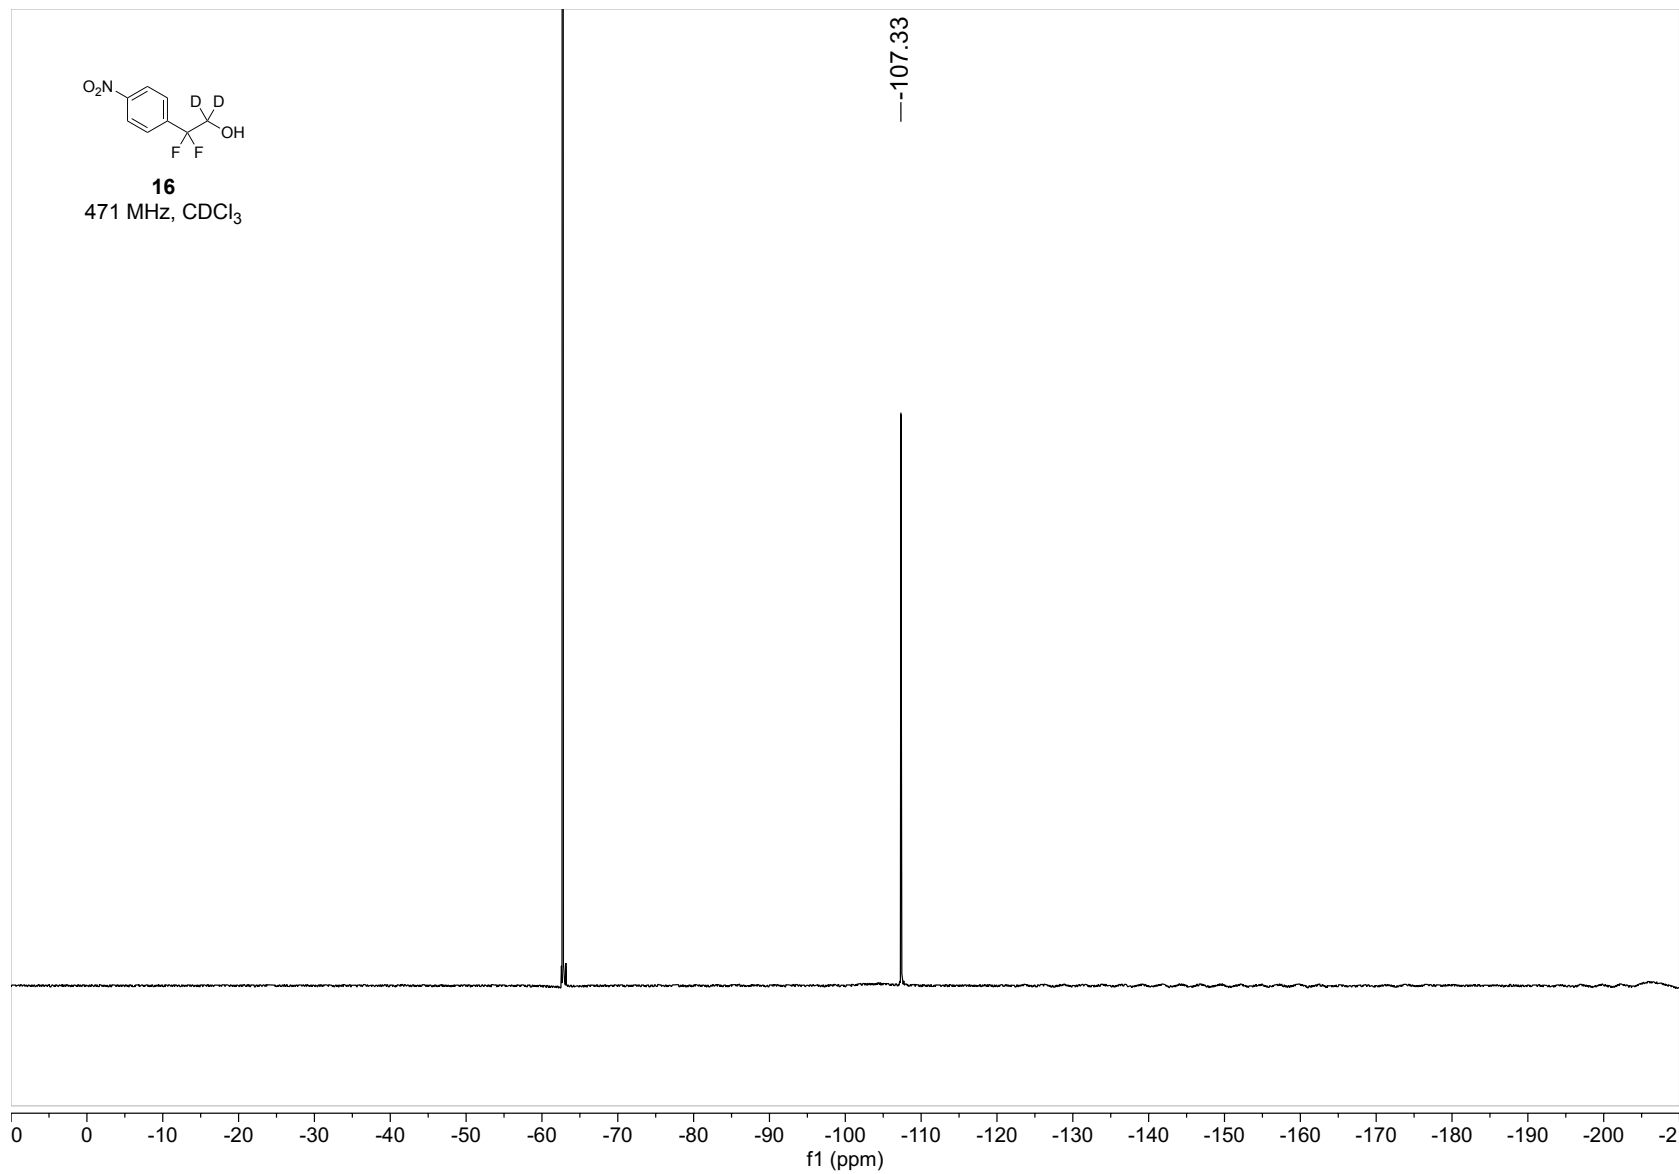



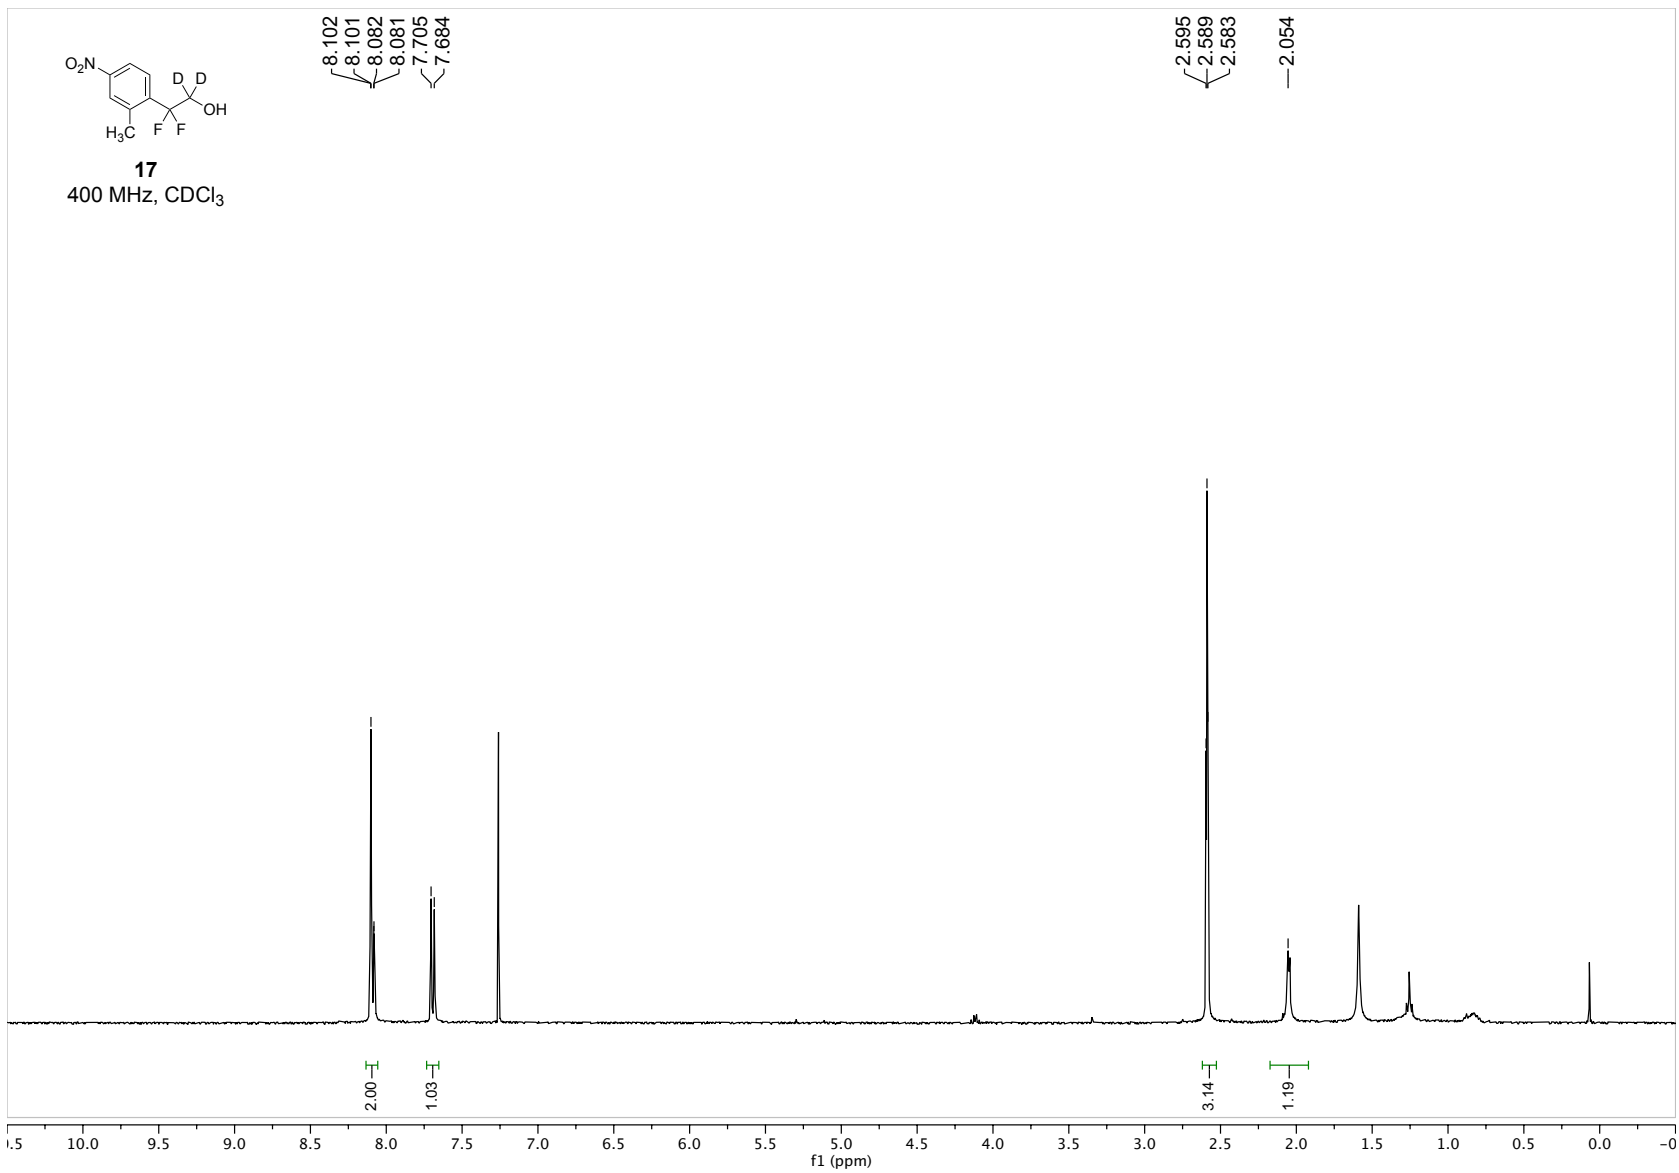

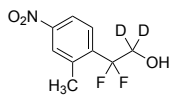

**17**  
125 MHz, CDCl<sub>3</sub>

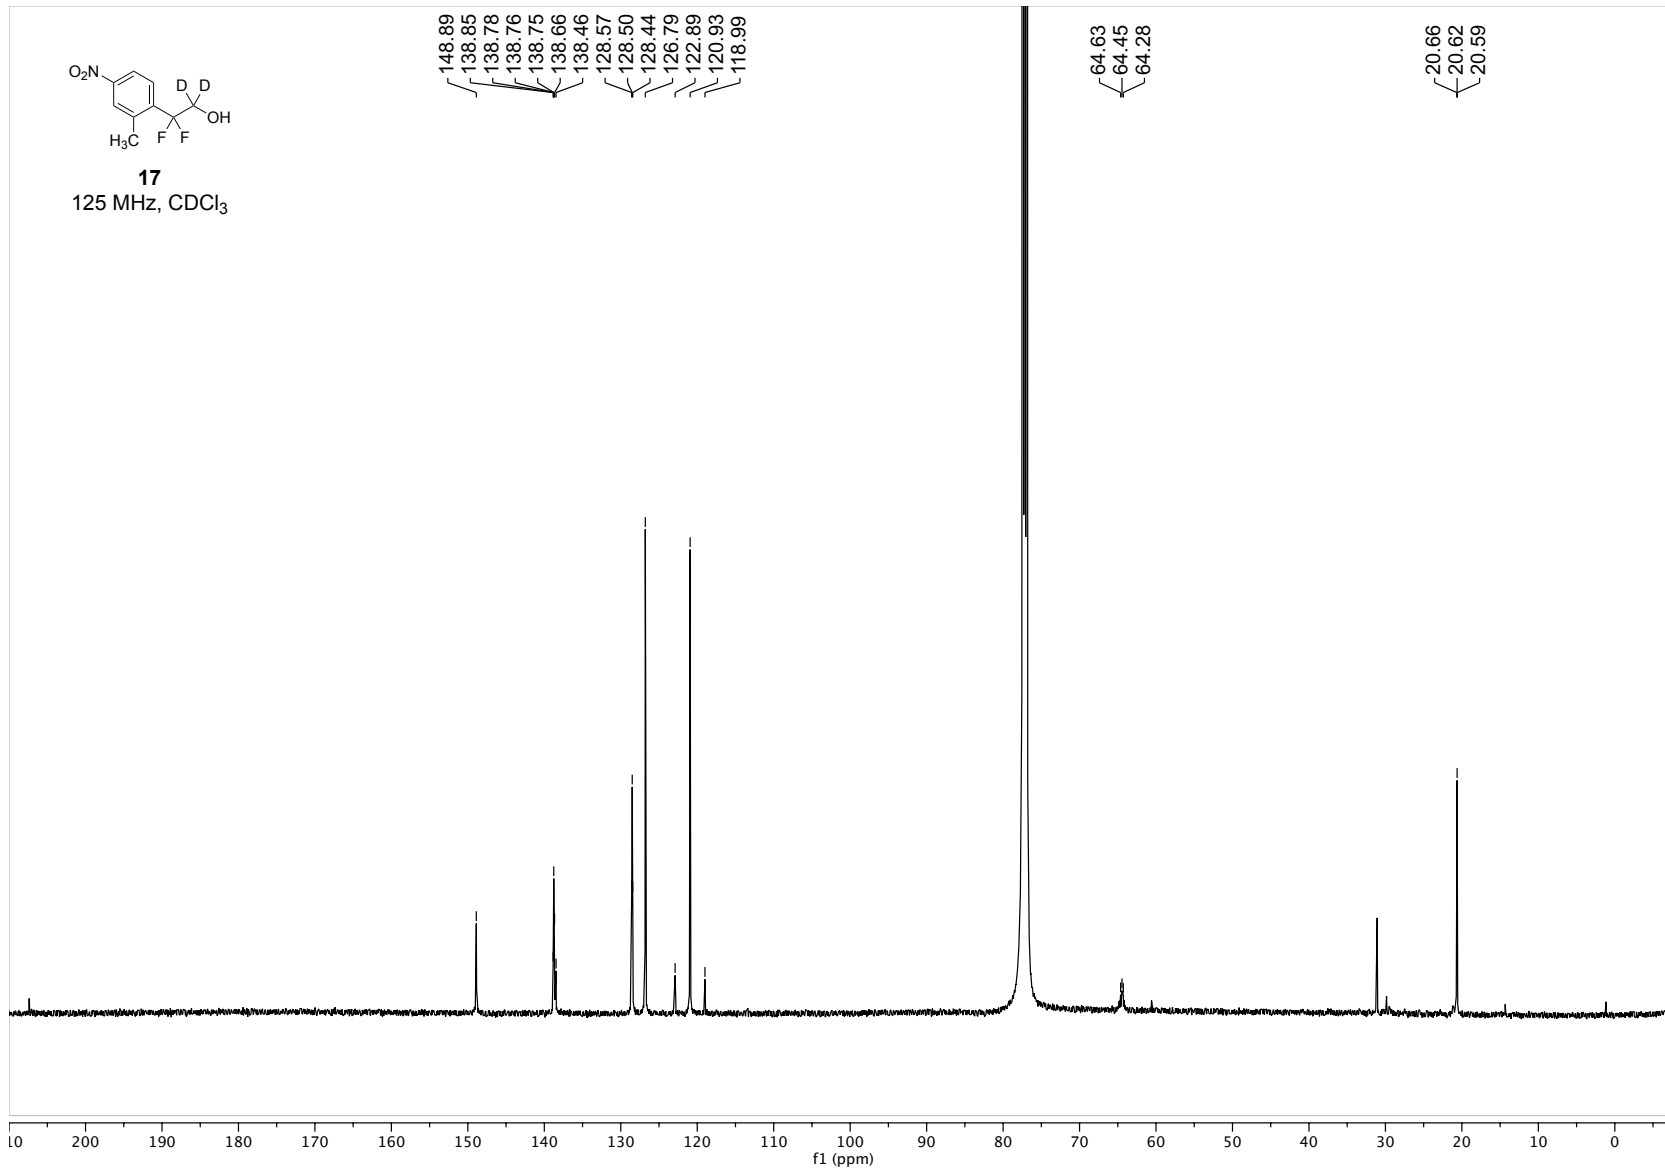

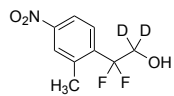

**17**  
471 MHz, CDCl<sub>3</sub>

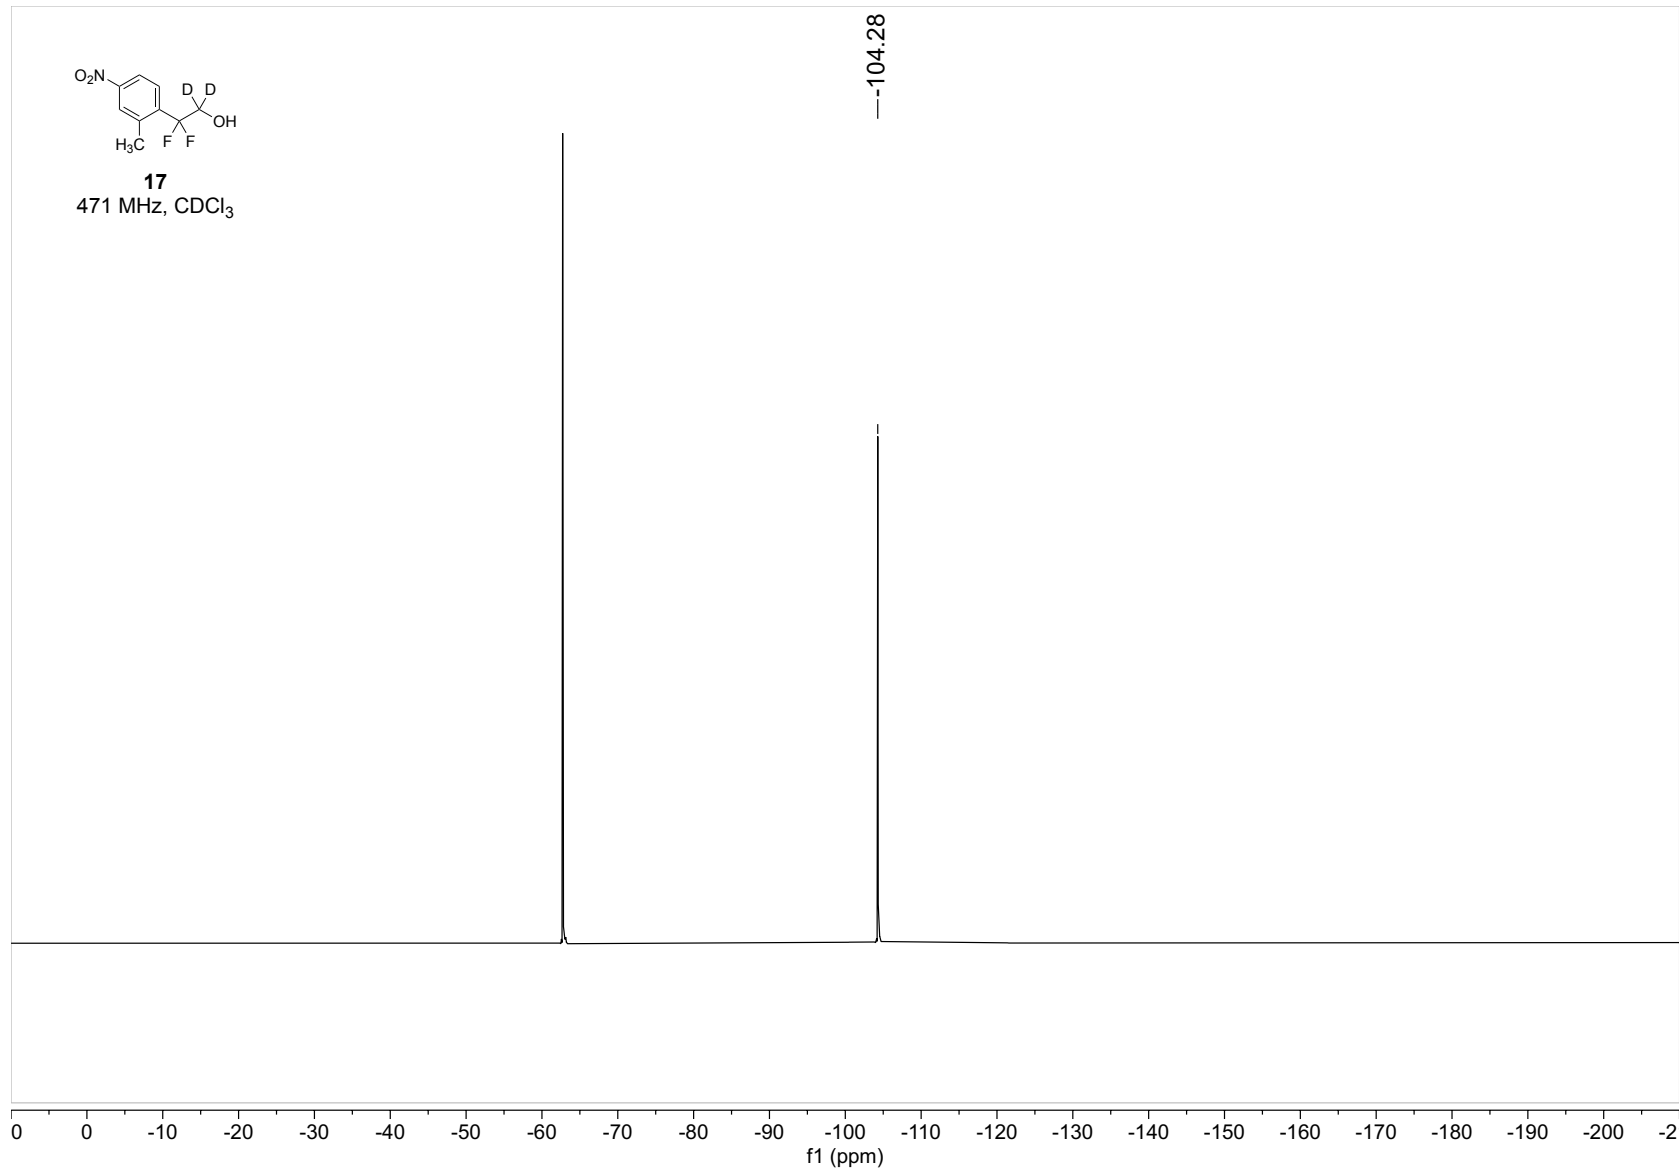

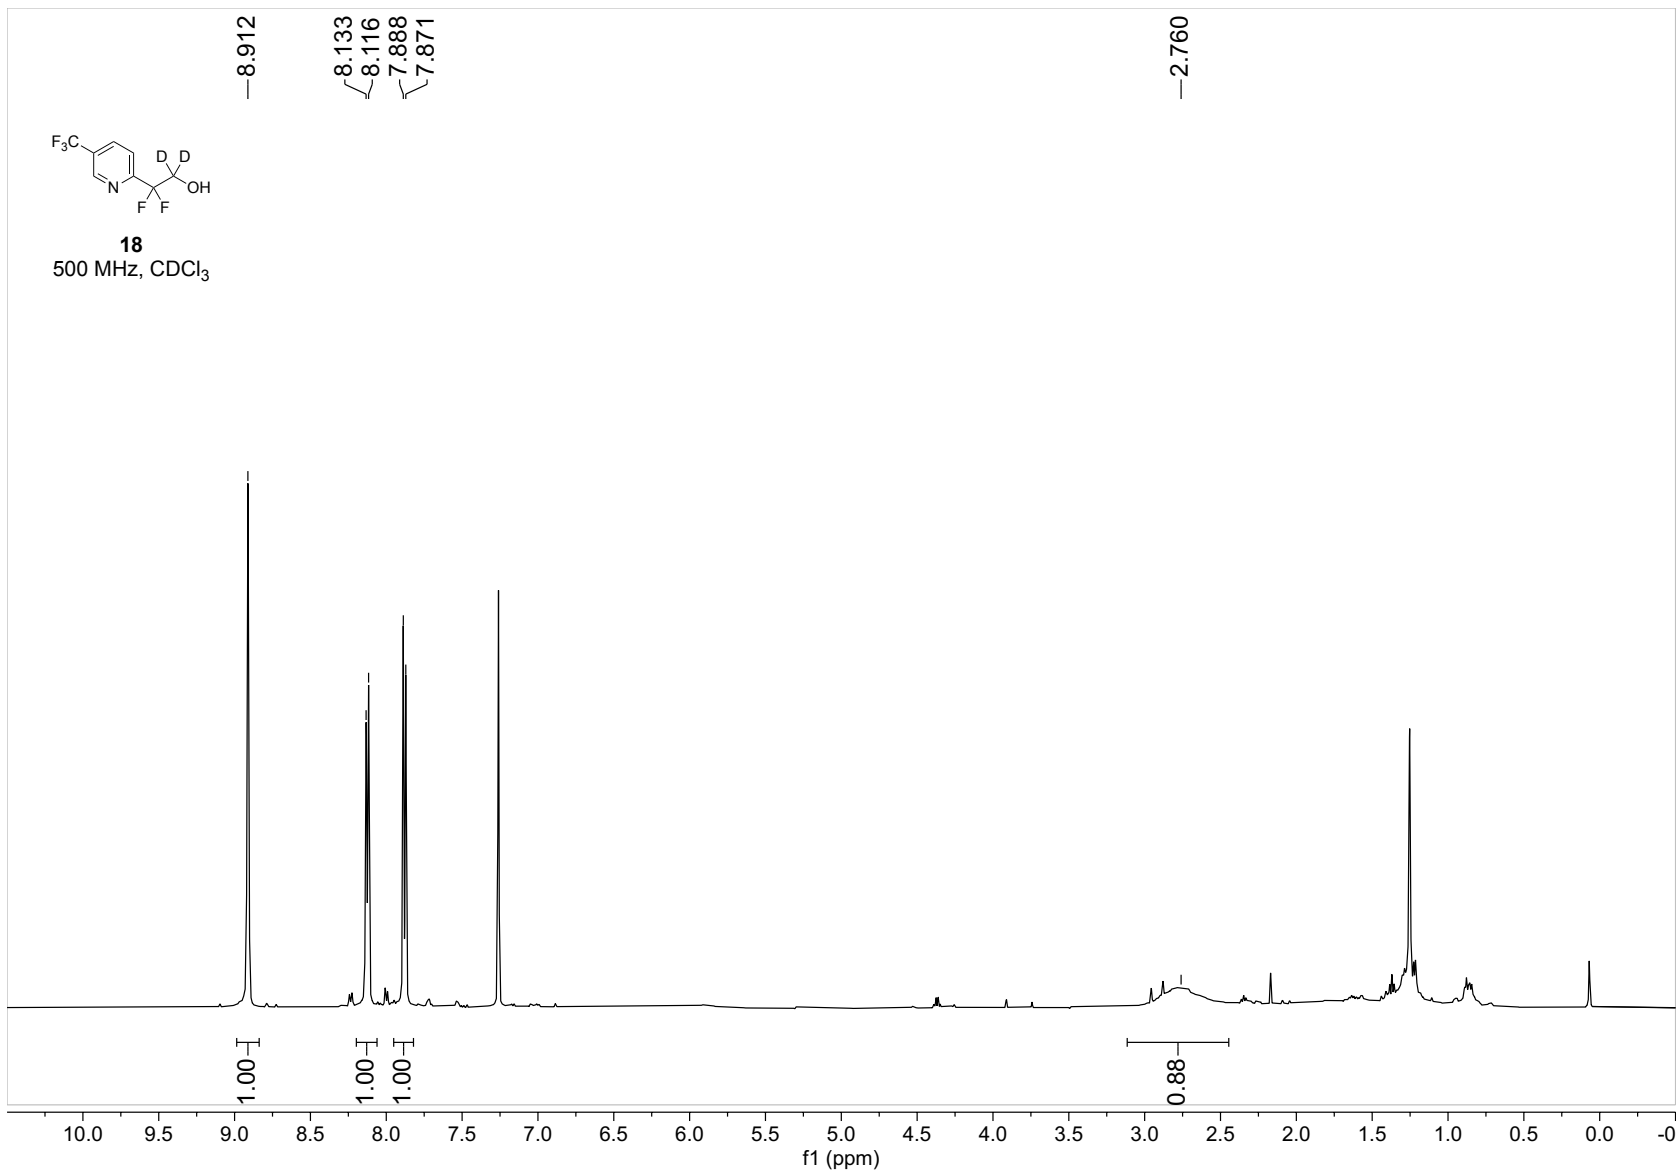

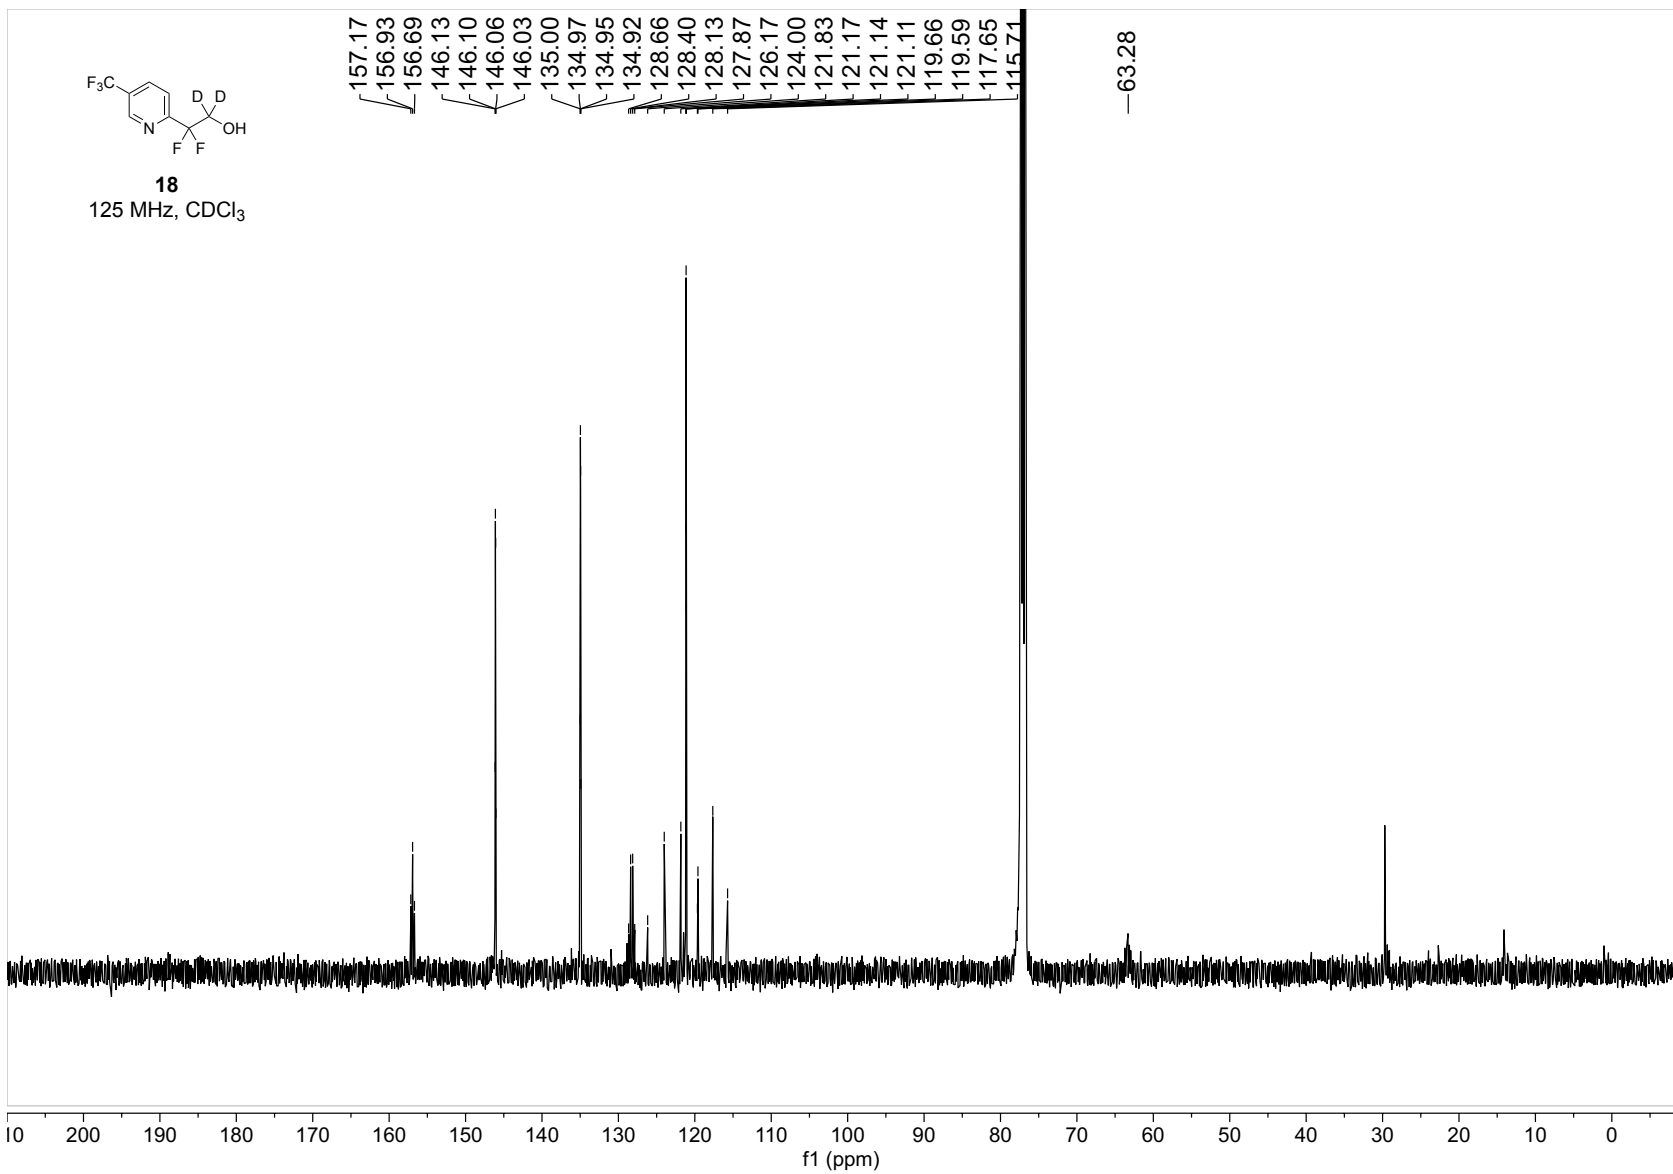

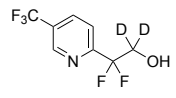

**18**  
471 MHz, CDCl<sub>3</sub>

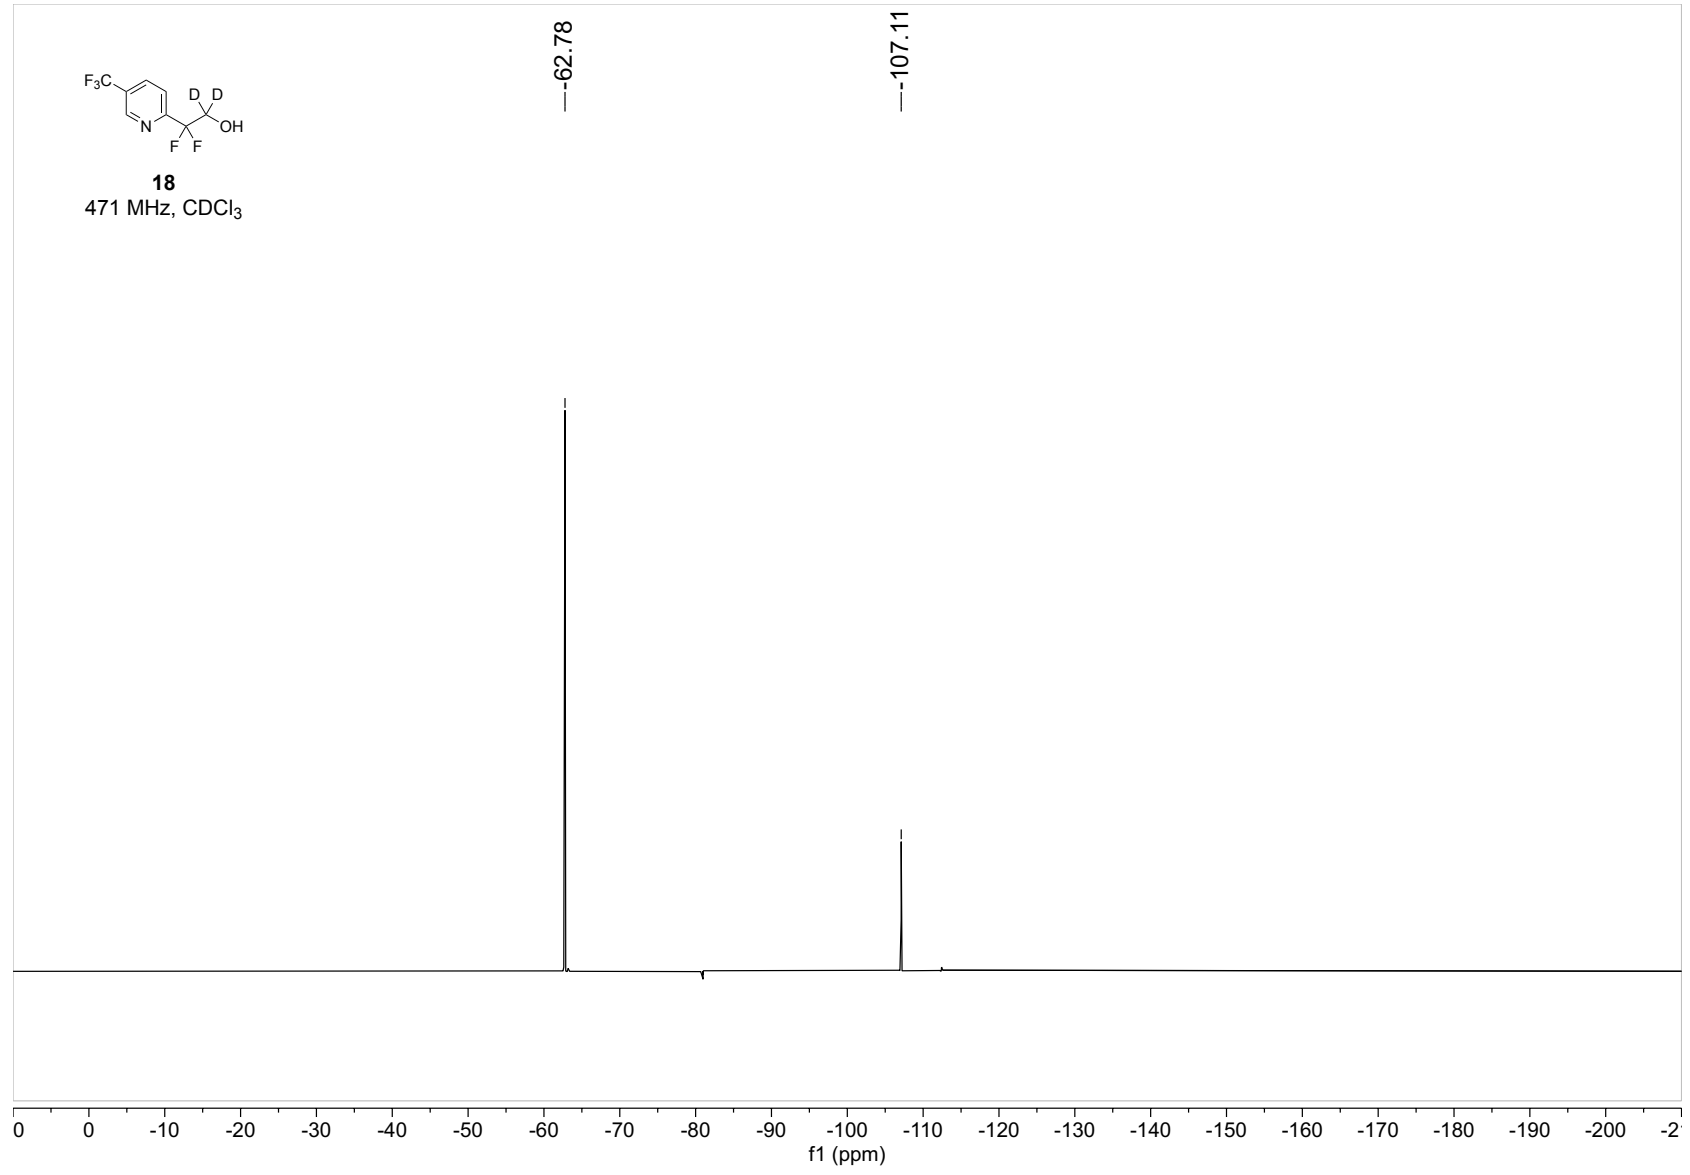

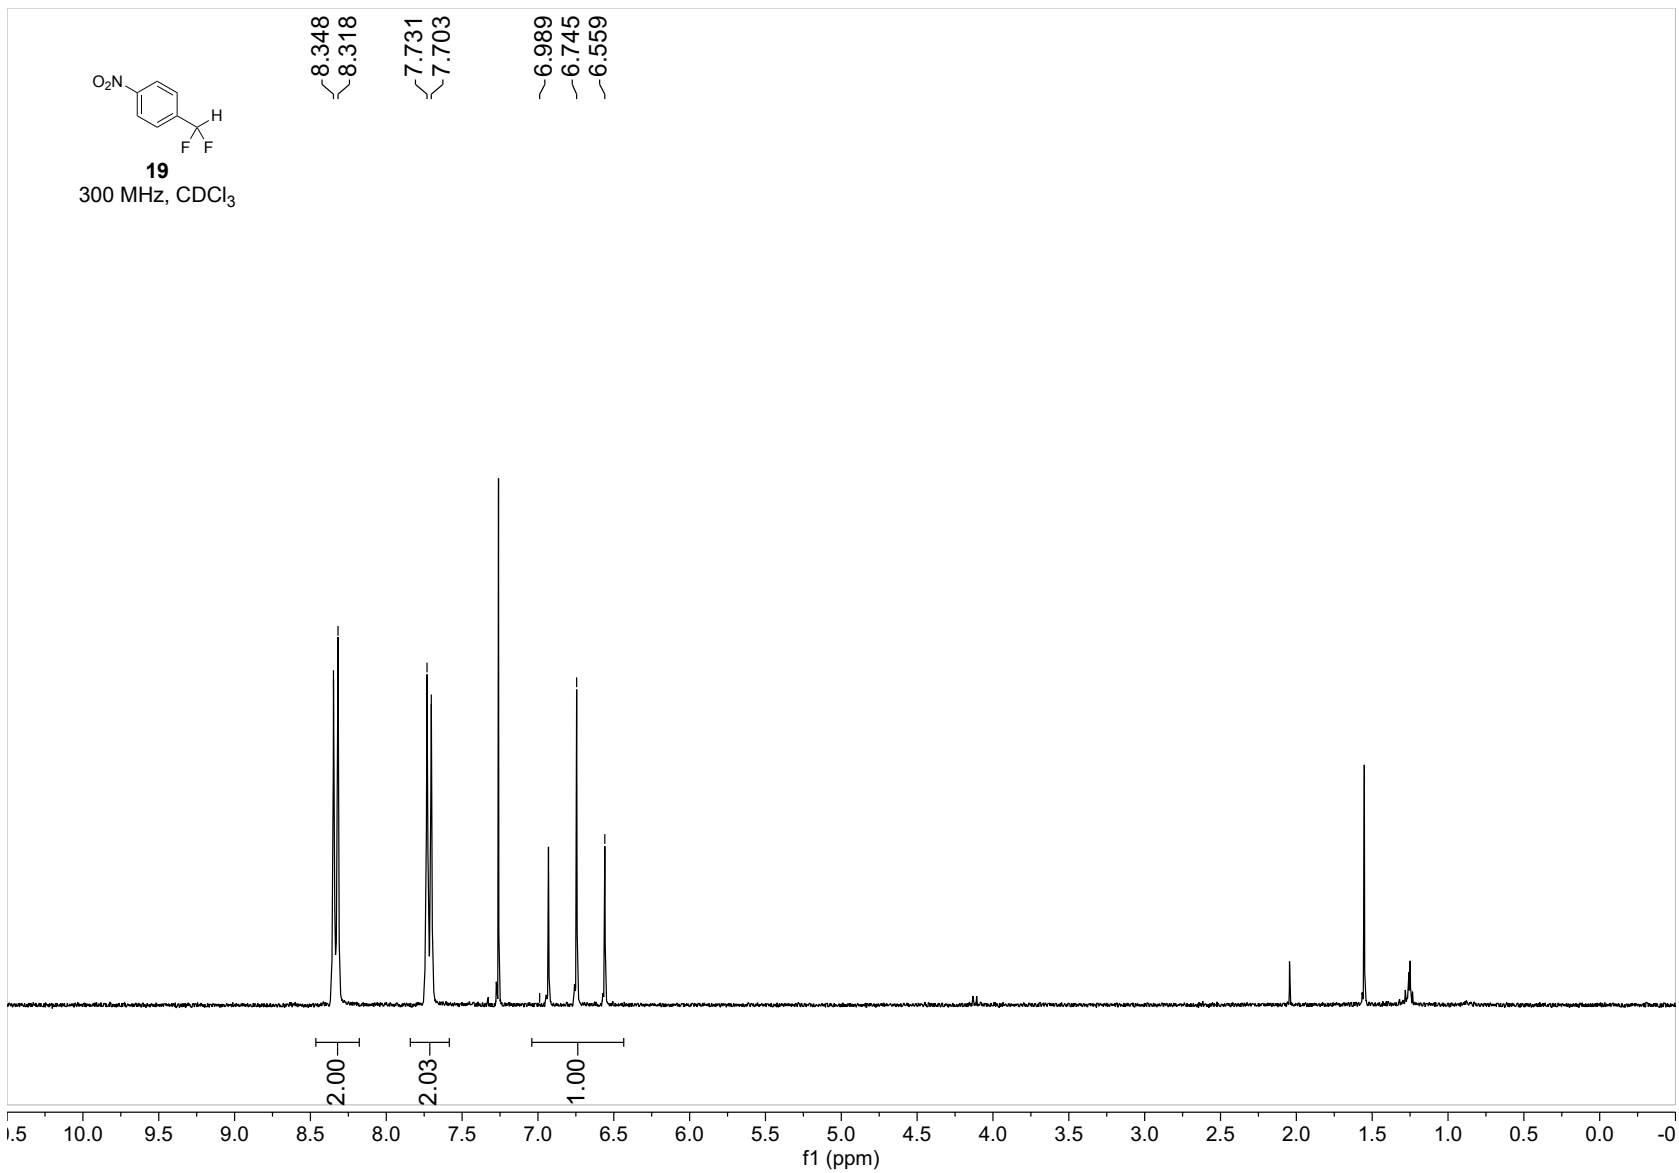

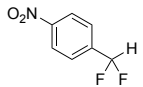

**19**  
282 MHz, CDCl<sub>3</sub>

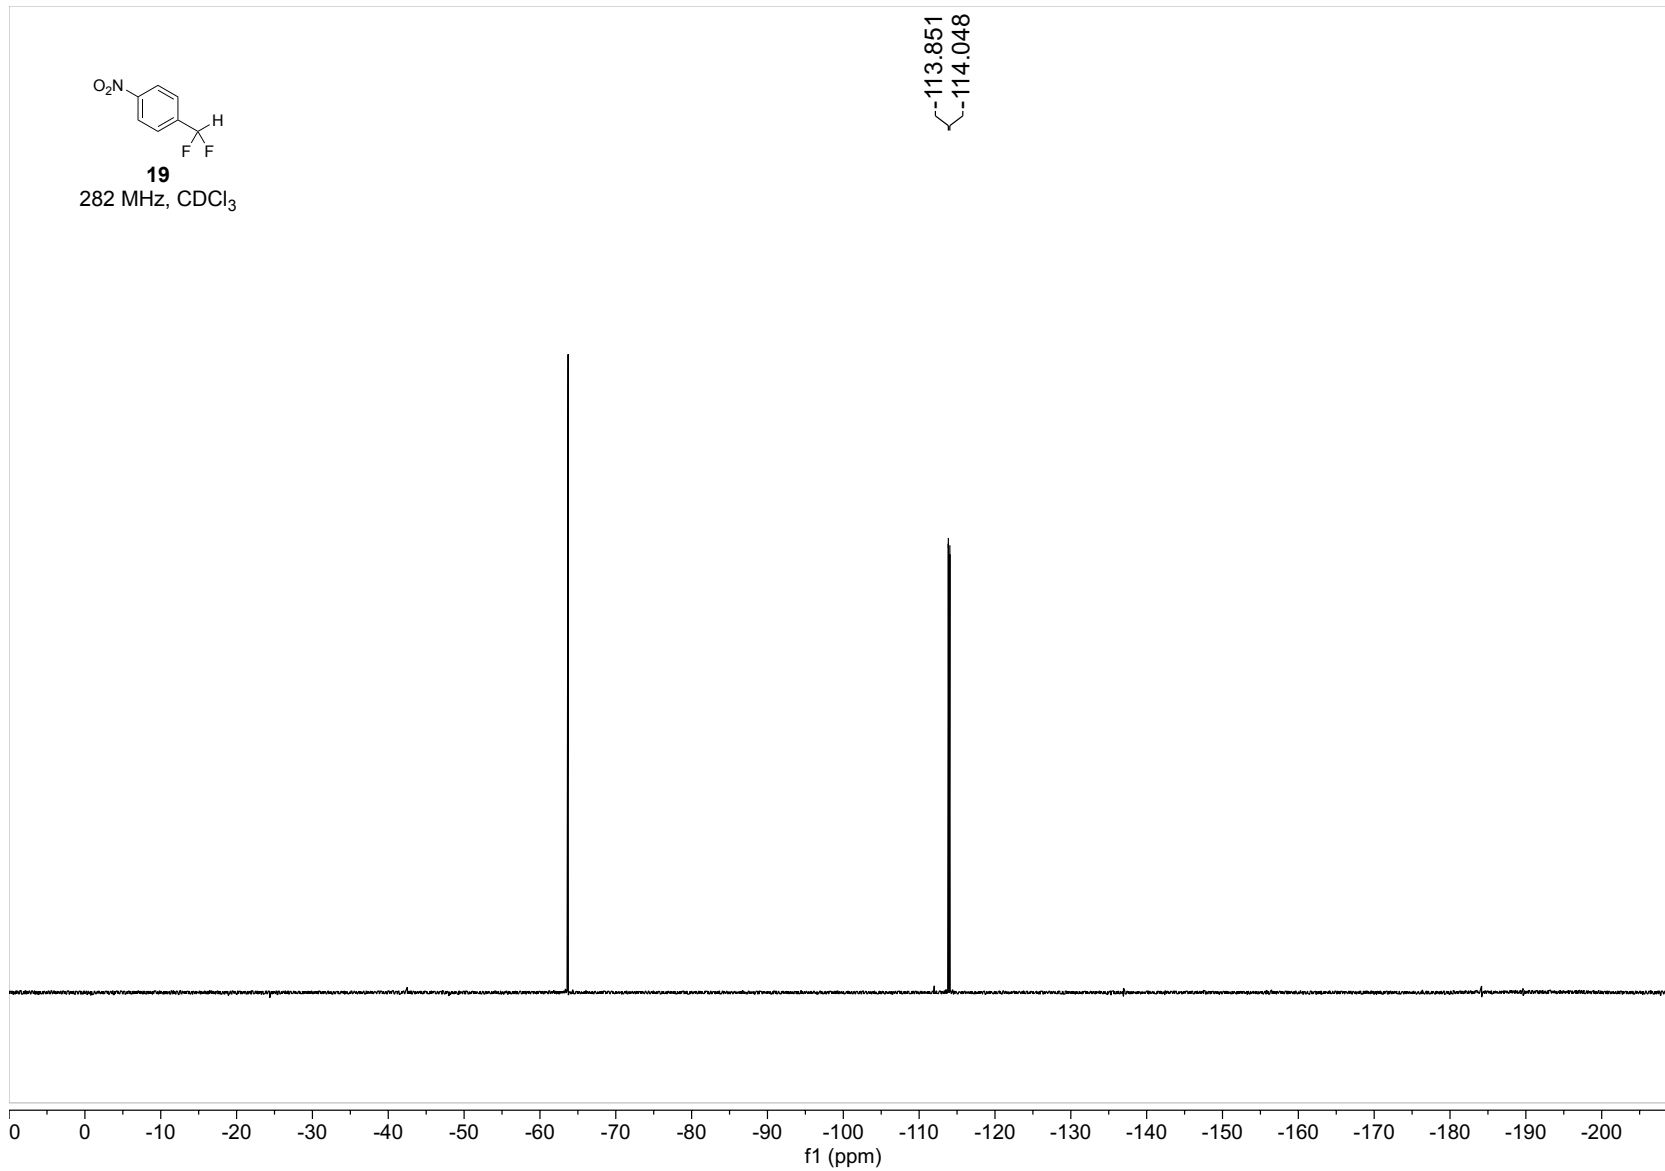



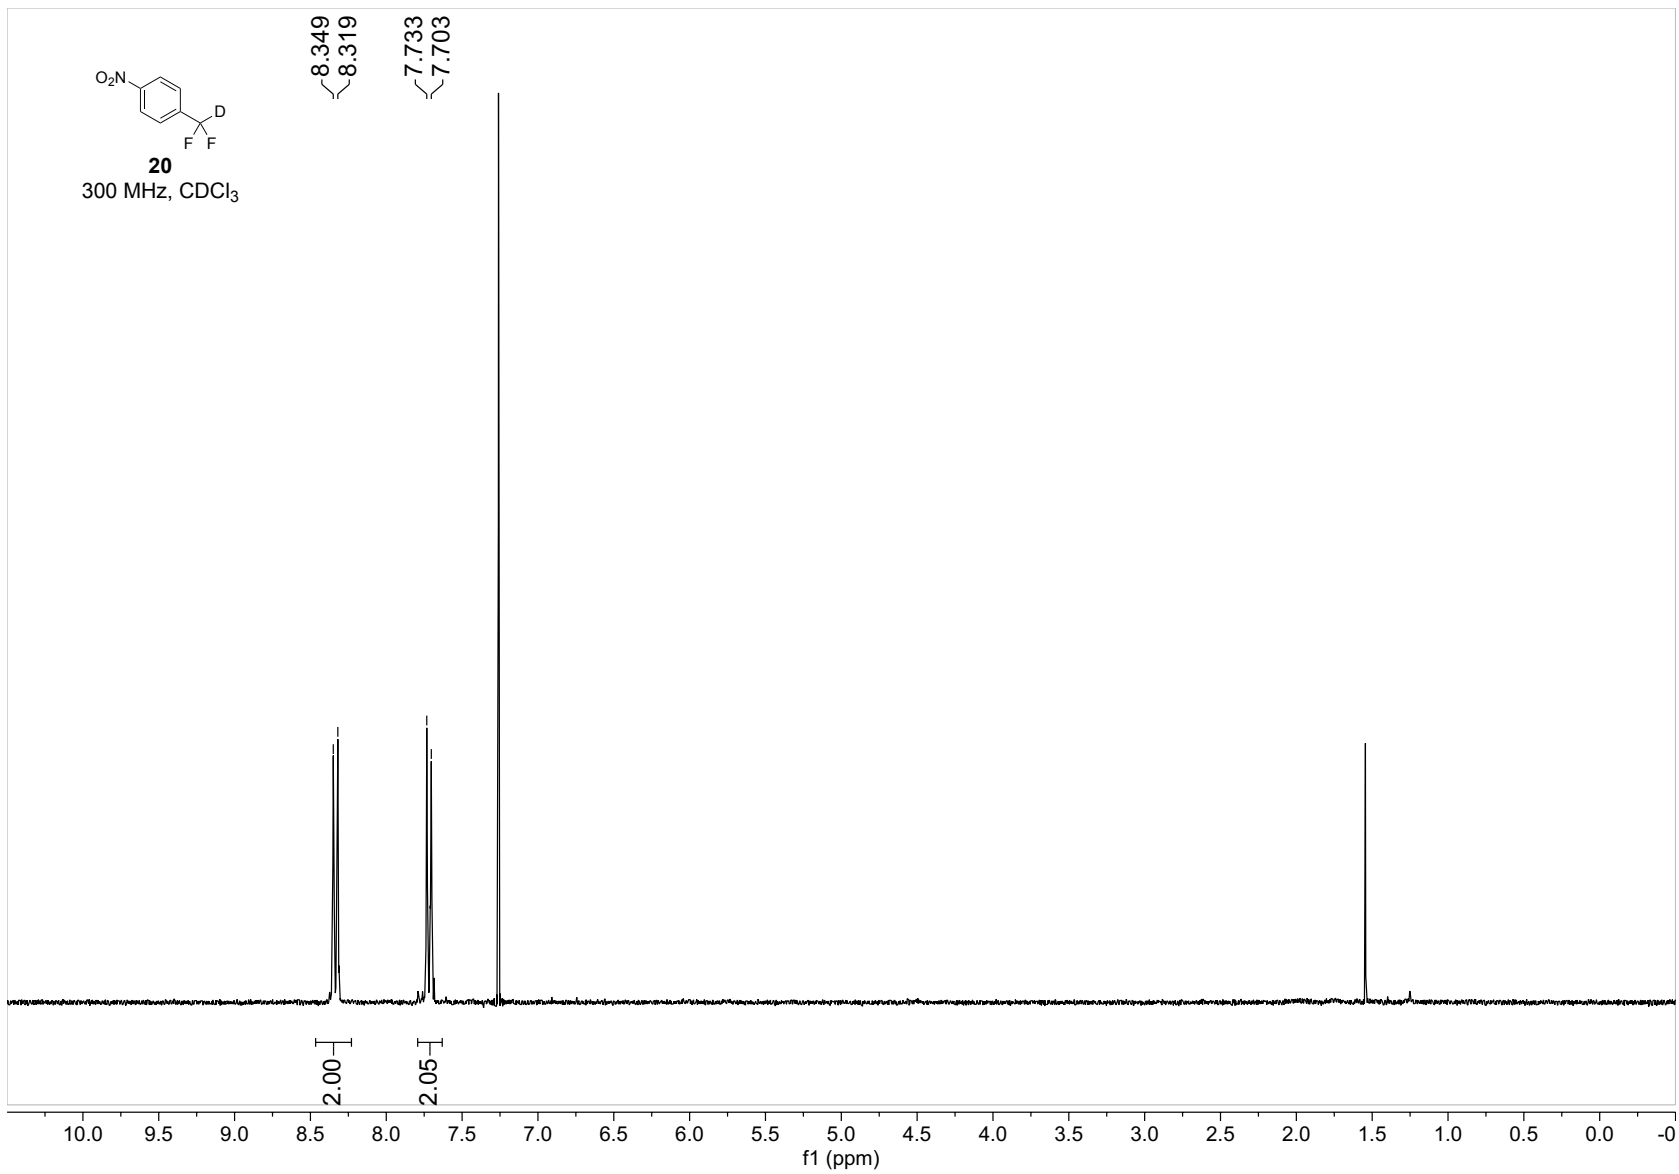

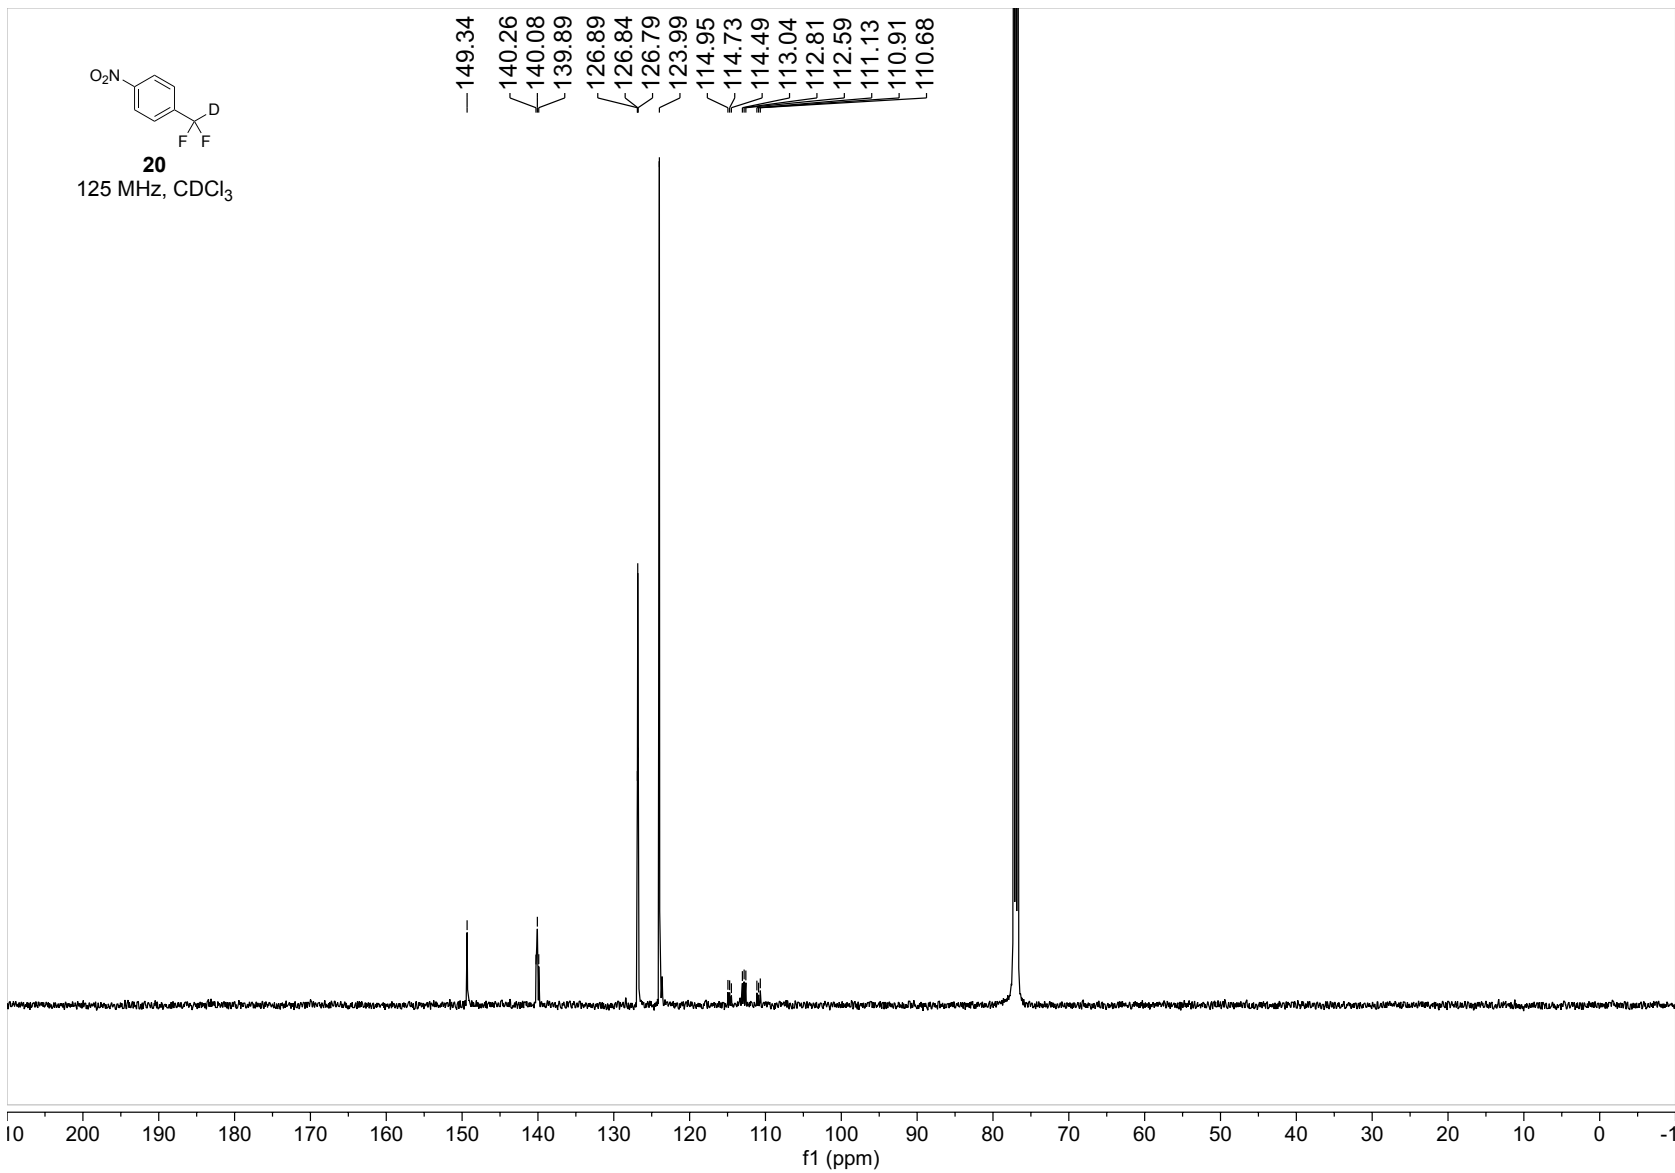

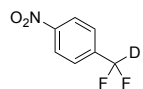

**20**  
282 MHz, CDCl<sub>3</sub>

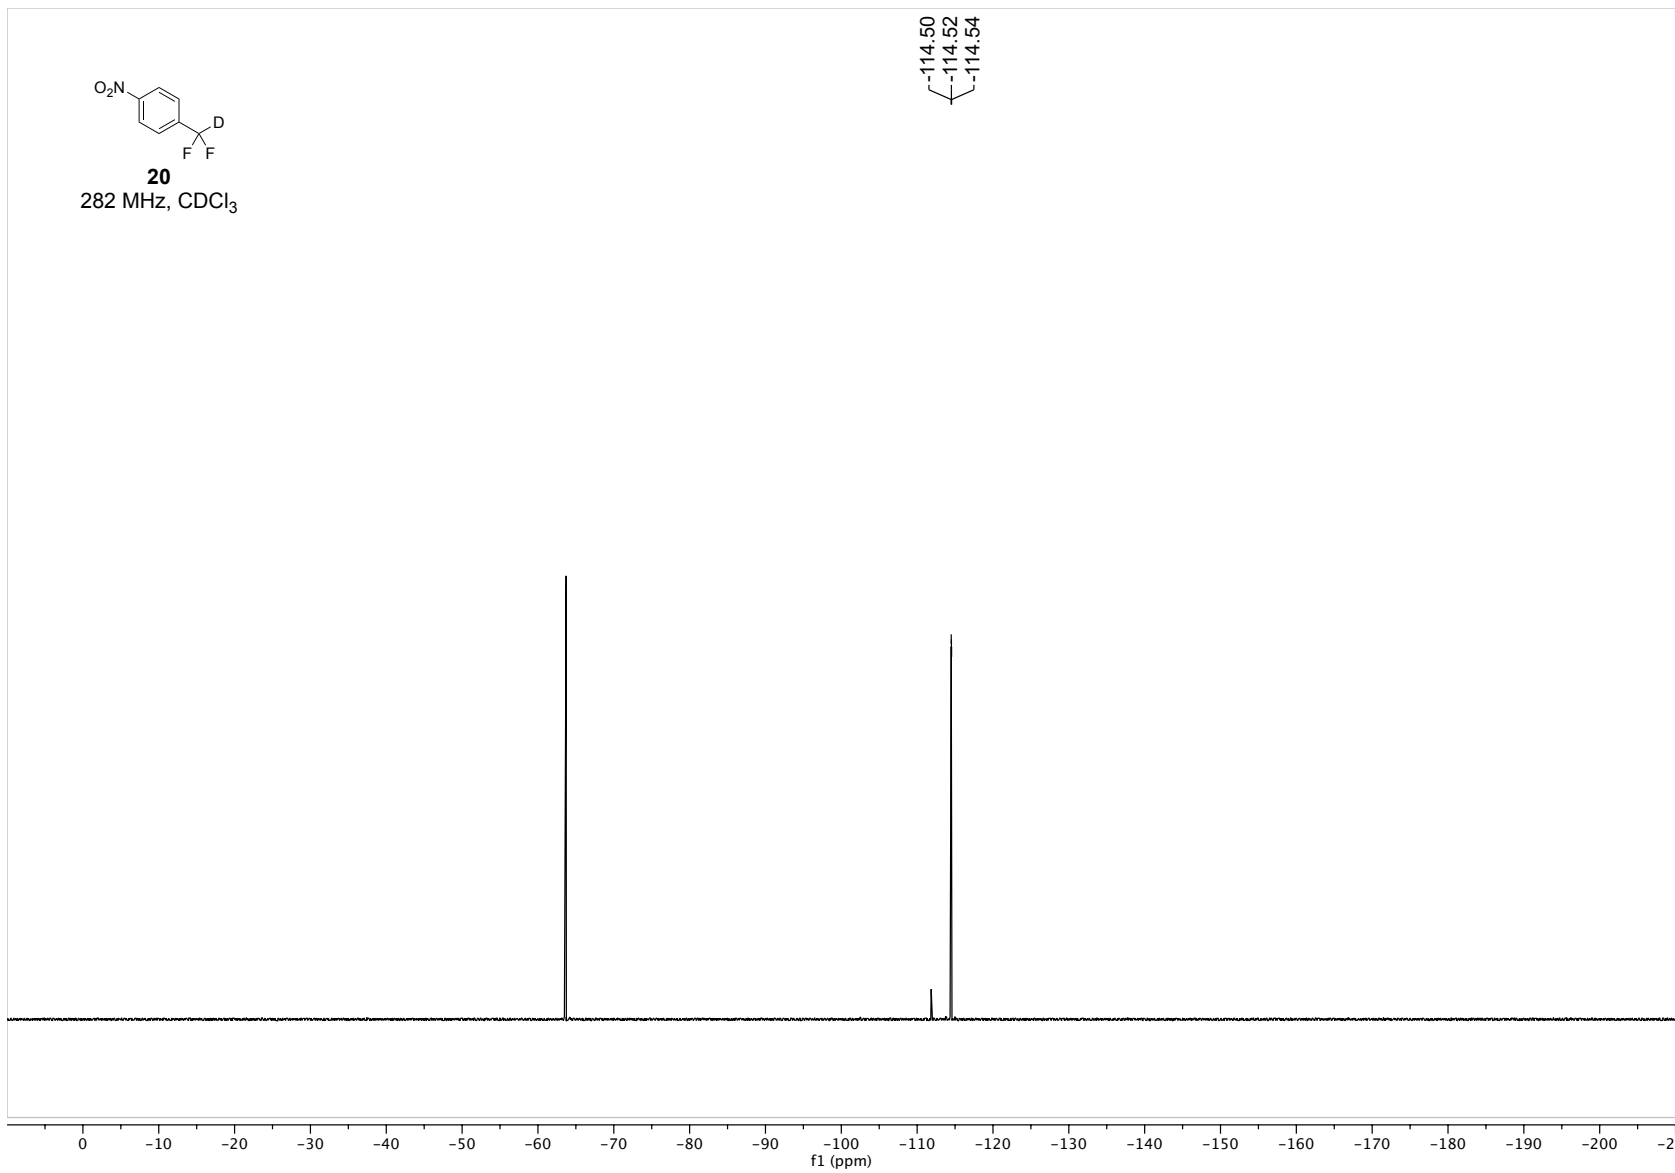

Supplement: d2cc01518h1.pdf [file d2cc01518h1.pdf]
